# Supplementary material for: Misinformation about medication during the COVID– 19 pandemic: A perspective of medical staff
Source: PubMed Central journal article supplement (PMC9612566; doi:10.1371/journal.pone.0276693), 2022-10-27
Supplement: pone.0276693.s007.pdf [file pone.0276693.s007.pdf]

Challenges in the communication process during the COVID-19 pandemic- a perspective of medical staff  
 --Manuscript Draft--

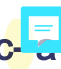

|                                |                                                                                                                                                                                                                                                                                                                                                                                                                                                                                                                                                                                                                                                                                                                                                                                                                                                                                                                                                                                                                                                                                                                                                                                                                                                                                                                                                                                                                                                                                                                                                                                                                                                                                                                                                                                                                                                                                                                                                                                                                                                                                                                                                          |
|--------------------------------|----------------------------------------------------------------------------------------------------------------------------------------------------------------------------------------------------------------------------------------------------------------------------------------------------------------------------------------------------------------------------------------------------------------------------------------------------------------------------------------------------------------------------------------------------------------------------------------------------------------------------------------------------------------------------------------------------------------------------------------------------------------------------------------------------------------------------------------------------------------------------------------------------------------------------------------------------------------------------------------------------------------------------------------------------------------------------------------------------------------------------------------------------------------------------------------------------------------------------------------------------------------------------------------------------------------------------------------------------------------------------------------------------------------------------------------------------------------------------------------------------------------------------------------------------------------------------------------------------------------------------------------------------------------------------------------------------------------------------------------------------------------------------------------------------------------------------------------------------------------------------------------------------------------------------------------------------------------------------------------------------------------------------------------------------------------------------------------------------------------------------------------------------------|
| <b>Manuscript Number:</b>      | PONE-D-22-09134R1                                                                                                                                                                                                                                                                                                                                                                                                                                                                                                                                                                                                                                                                                                                                                                                                                                                                                                                                                                                                                                                                                                                                                                                                                                                                                                                                                                                                                                                                                                                                                                                                                                                                                                                                                                                                                                                                                                                                                                                                                                                                                                                                        |
| <b>Article Type:</b>           | Research Article                                                                                                                                                                                                                                                                                                                                                                                                                                                                                                                                                                                                                                                                                                                                                                                                                                                                                                                                                                                                                                                                                                                                                                                                                                                                                                                                                                                                                                                                                                                                                                                                                                                                                                                                                                                                                                                                                                                                                                                                                                                                                                                                         |
| <b>Full Title:</b>             | Challenges in the communication process during the COVID-19 pandemic- a perspective of medical staff                                                                                                                                                                                                                                                                                                                                                                                                                                                                                                                                                                                                                                                                                                                                                                                                                                                                                                                                                                                                                                                                                                                                                                                                                                                                                                                                                                                                                                                                                                                                                                                                                                                                                                                                                                                                                                                                                                                                                                                                                                                     |
| <b>Short Title:</b>            | Challenges in the communication process during the COVID-19 pandemic                                                                                                                                                                                                                                                                                                                                                                                                                                                                                                                                                                                                                                                                                                                                                                                                                                                                                                                                                                                                                                                                                                                                                                                                                                                                                                                                                                                                                                                                                                                                                                                                                                                                                                                                                                                                                                                                                                                                                                                                                                                                                     |
| <b>Corresponding Author:</b>   | Claudiu Coman<br>Universitatea Transilvania din Brasov<br>Brasov, ROMANIA                                                                                                                                                                                                                                                                                                                                                                                                                                                                                                                                                                                                                                                                                                                                                                                                                                                                                                                                                                                                                                                                                                                                                                                                                                                                                                                                                                                                                                                                                                                                                                                                                                                                                                                                                                                                                                                                                                                                                                                                                                                                                |
| <b>Keywords:</b>               | Miscommunication; healthcare professionals; trust; Covid - 19 pandemic                                                                                                                                                                                                                                                                                                                                                                                                                                                                                                                                                                                                                                                                                                                                                                                                                                                                                                                                                                                                                                                                                                                                                                                                                                                                                                                                                                                                                                                                                                                                                                                                                                                                                                                                                                                                                                                                                                                                                                                                                                                                                   |
| <b>Abstract:</b>               | Background Healthcare professionals had to face numerous challenges during the pandemic, their professional activity being influenced not only by the virus, but also by the spread of medical misinformation. In this regard, we aimed to analyze, from the perspective of medical staff, the way medical and non - medical information about the virus was communicated during the pandemic in order to raise awareness about the way misinformation affected the medical staff. Methods and findings. The study was conducted on Romanian healthcare professionals including doctors, nurses and medical students. They were asked to answer to a questionnaire and the sample of the research includes 536 respondents. The findings revealed that most respondents stated that information about alternative treatments against the virus affected the credibility of health professionals, and that younger professionals believed to a greater extent that trust in doctors was affected. The research also showed that respondents were well informed about the drugs used in clinical trials in order to treat the virus, and that younger respondents believed that social media should be used to send official information. Among the main limitations of our study we mention the fact that we used only quantitative methods and the fact we focused only on Romanian healthcare professionals. Conclusions Healthcare professionals declared that the spread of misinformation regarding alternative treatments, affected their credibility and the relationship with their patients. Healthcare professionals had knowledge about the drugs used in clinical trials, and they acknowledged the role of social media in spreading medical misinformation. However, younger professionals also believed that social media could be used to share official information about the virus. A future research should focus on studying the opinion of Romanian and international doctors, it should use qualitative methods too and should address the issue of social media being an appropriate environment for sending official information. |
| <b>Order of Authors:</b>       | Claudiu Coman<br>Maria Cristina Bularca<br>Angela Repanovici<br>Liliana Rogozea                                                                                                                                                                                                                                                                                                                                                                                                                                                                                                                                                                                                                                                                                                                                                                                                                                                                                                                                                                                                                                                                                                                                                                                                                                                                                                                                                                                                                                                                                                                                                                                                                                                                                                                                                                                                                                                                                                                                                                                                                                                                          |
| <b>Response to Reviewers:</b>  | We took into account the comments of the editor and we uploaded again our supporting information in a zip format.<br>The platform required us to upload a version of the manuscript with track changes but we were not required to make any changes to the manuscript.<br>The comments of the editor mentioned only to upload our supporting information in zip format.                                                                                                                                                                                                                                                                                                                                                                                                                                                                                                                                                                                                                                                                                                                                                                                                                                                                                                                                                                                                                                                                                                                                                                                                                                                                                                                                                                                                                                                                                                                                                                                                                                                                                                                                                                                  |
| <b>Additional Information:</b> |                                                                                                                                                                                                                                                                                                                                                                                                                                                                                                                                                                                                                                                                                                                                                                                                                                                                                                                                                                                                                                                                                                                                                                                                                                                                                                                                                                                                                                                                                                                                                                                                                                                                                                                                                                                                                                                                                                                                                                                                                                                                                                                                                          |
| <b>Question</b>                | <b>Response</b>                                                                                                                                                                                                                                                                                                                                                                                                                                                                                                                                                                                                                                                                                                                                                                                                                                                                                                                                                                                                                                                                                                                                                                                                                                                                                                                                                                                                                                                                                                                                                                                                                                                                                                                                                                                                                                                                                                                                                                                                                                                                                                                                          |
| <b>Financial Disclosure</b>    | The authors received no specific funding for this work.                                                                                                                                                                                                                                                                                                                                                                                                                                                                                                                                                                                                                                                                                                                                                                                                                                                                                                                                                                                                                                                                                                                                                                                                                                                                                                                                                                                                                                                                                                                                                                                                                                                                                                                                                                                                                                                                                                                                                                                                                                                                                                  |

Enter a financial disclosure statement that describes the sources of funding for the work included in this submission. Review the [submission guidelines](#) for detailed requirements. View published research articles from [PLOS ONE](#) for specific examples.

This statement is required for submission and **will appear in the published article** if the submission is accepted. Please make sure it is accurate.

#### Unfunded studies

Enter: *The author(s) received no specific funding for this work.*

#### Funded studies

Enter a statement with the following details:

- Initials of the authors who received each award
- Grant numbers awarded to each author
- The full name of each funder
- URL of each funder website
- Did the sponsors or funders play any role in the study design, data collection and analysis, decision to publish, or preparation of the manuscript?
- **NO** - Include this sentence at the end of your statement: *The funders had no role in study design, data collection and analysis, decision to publish, or preparation of the manuscript.*
- **YES** - Specify the role(s) played.

\* typeset

#### Competing Interests

Use the instructions below to enter a competing interest statement for this submission. On behalf of all authors, disclose any [competing interests](#) that could be perceived to bias this work—acknowledging all financial support and any other relevant financial or non-financial competing interests.

This statement is **required** for submission and **will appear in the published article** if the submission is accepted. Please make

The authors have declared that no competing interests exist.

sure it is accurate and that any funding sources listed in your Funding Information later in the submission form are also declared in your Financial Disclosure statement.

View published research articles from [PLOS ONE](#) for specific examples.

**NO authors have competing interests**

Enter: *The authors have declared that no competing interests exist.*

**Authors with competing interests**

Enter competing interest details beginning with this statement:

*I have read the journal's policy and the authors of this manuscript have the following competing interests: [insert competing interests here]*

\* typeset

**Ethics Statement**

Enter an ethics statement for this submission. This statement is required if the study involved:

- Human participants
- Human specimens or tissue
- Vertebrate animals or cephalopods
- Vertebrate embryos or tissues
- Field research

Write "N/A" if the submission does not require an ethics statement.

General guidance is provided below. Consult the [submission guidelines](#) for detailed instructions. **Make sure that all information entered here is included in the Methods section of the manuscript.**

APPROVAL OF THE COUNCIL OF THE FACULTY OF SOCIOLOGY AND COMMUNICATION

Approval request: Nr.378/30.03.2021

Form of consent obtained: oral

**Format for specific study types**

**Human Subject Research (involving human participants and/or tissue)**

- Give the name of the institutional review board or ethics committee that approved the study
- Include the approval number and/or a statement indicating approval of this research
- Indicate the form of consent obtained (written/oral) or the reason that consent was not obtained (e.g. the data were analyzed anonymously)

**Animal Research (involving vertebrate animals, embryos or tissues)**

- Provide the name of the Institutional Animal Care and Use Committee (IACUC) or other relevant ethics board that reviewed the study protocol, and indicate whether they approved this research or granted a formal waiver of ethical approval
- Include an approval number if one was obtained
- If the study involved *non-human primates*, add *additional details* about animal welfare and steps taken to ameliorate suffering
- If anesthesia, euthanasia, or any kind of animal sacrifice is part of the study, include briefly which substances and/or methods were applied

**Field Research**

Include the following details if this study involves the collection of plant, animal, or other materials from a natural setting:

- Field permit number
- Name of the institution or relevant body that granted permission

**Data Availability**

Authors are required to make all data underlying the findings described fully available, without restriction, and from the time of publication. PLOS allows rare exceptions to address legal and ethical concerns. See the [PLOS Data Policy](#) and [FAQ](#) for detailed information.

Yes - all data are fully available without restriction

A Data Availability Statement describing where the data can be found is required at submission. Your answers to this question constitute the Data Availability Statement and **will be published in the article**, if accepted.

**Important:** Stating 'data available on request from the author' is not sufficient. If your data are only available upon request, select 'No' for the first question and explain your exceptional situation in the text box.

Do the authors confirm that all data underlying the findings described in their manuscript are fully available without restriction?

**Describe where the data may be found in full sentences. If you are copying our sample text, replace any instances of XXX with the appropriate details.**

- If the data are **held or will be held in a public repository**, include URLs, accession numbers or DOIs. If this information will only be available after acceptance, indicate this by ticking the box below. For example: *All XXX files are available from the XXX database (accession number(s) XXX, XXX).*
- If the data are all contained **within the manuscript and/or Supporting Information files**, enter the following: *All relevant data are within the manuscript and its Supporting Information files.*
- If neither of these applies but you are able to provide **details of access elsewhere**, with or without limitations, please do so. For example:

*Data cannot be shared publicly because of [XXX]. Data are available from the XXX Institutional Data Access / Ethics Committee (contact via XXX) for researchers who meet the criteria for access to confidential data.*

*The data underlying the results presented in the study are available from (include the name of the third party*

All relevant data are within the manuscript and its Supporting Information files.

|                                                                                                                                                                                                                                         |  |
|-----------------------------------------------------------------------------------------------------------------------------------------------------------------------------------------------------------------------------------------|--|
| <p><i>and contact information or URL).</i></p> <ul style="list-style-type: none"><li>• This text is appropriate if the data are owned by a third party and authors do not have permission to share the data.</li></ul> <p>* typeset</p> |  |
| Additional data availability information:                                                                                                                                                                                               |  |

1 Challenges in the communication process during the COVID-19 pandemic- a perspective of  
2 medical staff

3

4 Claudiu Coman<sup>1#a\*</sup>, Maria Cristina Bularca<sup>1</sup>, Angela Repanovici<sup>2</sup>, Liliana Rogozea<sup>3</sup>

5 1 Department of Social Sciences and Communication, Faculty of Sociology and Communication,  
6 Transilvania University of Brasov, Brasov, Romania;

7 2 Department of Product Design, Mechatronics and Environment, Faculty of Product Design and  
8 Environment, Transilvania University of Brasov, Brasov, Romania

9 3 Basic, Preventive and Clinical Sciences Department, Transilvania University of Brasov, Brasov,  
10 Romania;

11

12 #a Current address: Department of Social Sciences and Communication, Faculty of Sociology and  
13 Communication, Transilvania University of Braşov, Brasov, România

14

15 \* Corresponding author

16 E-mail: [claudiu.coman@unitbv.ro](mailto:claudiu.coman@unitbv.ro) (CC)

17

18

19

20

21

22

23

## 24 **Abstract**

25 Background. Healthcare professionals had to face numerous challenges during the pandemic,  
26 their professional activity being influenced not only by the virus, but also by the spread of  
27 medical misinformation. In this regard, we aimed to analyze, from the perspective of medical  
28 staff, the way medical and non - medical information about the virus was communicated during  
29 the pandemic in order to raise awareness about the way misinformation affected the medical  
30 staff.

31 Methods and findings. The study was conducted on Romanian healthcare professionals  
32 including doctors, nurses and medical students. They were asked to answer to a questionnaire  
33 and the sample of the research includes 536 respondents. The findings revealed that most  
34 respondents stated that information about alternative treatments against the virus affected the  
35 credibility of health professionals, and that younger professionals believed to a greater extent  
36 that trust in doctors was affected. The research also showed that respondents were well  
37 informed about the drugs used in clinical trials in order to treat the virus, and that younger  
38 respondents believed that social media should be used to send official information. Among the  
39 main limitations of our study we mention the fact that we used only quantitative methods and  
40 the fact we focused only on Romanian healthcare professionals.

41 Conclusions. Healthcare professionals declared that the spread of misinformation regarding  
42 alternative treatments, affected their credibility and the relationship with their patients.  
43 Healthcare professionals had knowledge about the drugs used in clinical trials, and they  
44 acknowledged the role of social media in spreading medical misinformation. However, younger  
45 professionals also believed that social media could be used to share official information about



46 the virus. A future research should focus on studying the opinion of Romanian and international  
47 doctors, it should use qualitative methods too and should address the issue of social media  
48 being an appropriate environment for sending official information.

## 49 **Introduction**

50 The COVID 19 pandemic generated multiple changes in the way today's society  
51 members carry out their daily activities. While many domains were affected by the spread of  
52 the virus, such as the educational system or the cultural sector, the health sector was the one  
53 that faced the most challenges, the pandemic managing to generate a tremendous global public  
54 health crisis [1].

55 Caused by severe acute respiratory syndrome coronavirus 2 (SARS-CoV-2) [2], the  
56 disease was firstly detected in December 2019, in Wuhan, China [3], and it fastly spread all over  
57 the world. The World Health Organization was informed about a pneumonia outbreak in  
58 Wuhan on December 31 2019, the number of cases continued to increase, and on March 11  
59 2020 the World Health Organization characterized COVID 19 as a pandemic [4]. Being highly  
60 contagious, the virus affected a large number of people, and as of November 27 over 61 million  
61 cases were reported [5]. Even though many companies and institutions are struggling to  
62 develop a vaccine, Pfizer, Gamaleya Research Institute, University of Oxford, and a preliminary  
63 analysis of the vaccine proposed by Pfizer showed that the vaccine is able to prevent more than  
64 90% of people from getting infected with COVID 19 [6], so far no vaccine was approved as a  
65 general and universal vaccine against COVID 19 [7].

66 Ever since the pandemic was declared, finding the right treatment for the virus has  
67 become a priority for researchers and doctors from all over the world. In this regard, large

68 number of trials started to be conducted, and in order to find an efficient drug treatment  
69 against the virus, one method that was adopted was testing and administrating to patients,  
70 drugs that were previously used for curing other viruses [8]. Thus, on March 20 2020, The  
71 World Health Organization launched the SOLIDARITY clinical trial, a trial that monitored the  
72 effects on patients infected with COVID 19, of specific drugs that proven to be effective in the  
73 treatment of other diseases: remdesivir, interferon beta, chloroquine and hydroxychloroquine -  
74 previously used for Malaria, as well as drugs used on HIV patients: lopinavir and ritonavir [9].  
75 However, according to the interim results published on October 15 2020 by WHO, even though  
76 those drugs were taught to have positive effects on treating COVID 19, they had little influence  
77 or no influence at all on mortality in general, on the need and initiation of ventilation and on  
78 the recovery process [10].

79 With the development of many trials and programs meant to find a cure for COVID 19  
80 and with the use of diverse drug combinations, another major problem arose: misinformation  
81 and fake news about the virus, its treatment or methods to combat it. In this regard, along with  
82 the pandemic, people also had to face an epidemic of information, described by the general  
83 director of WHO as an „infodemic” [11]. In other words, information about COVID 19 began to  
84 be spread by people on every available communication channel, both in the online and offline  
85 environment. However, very often and especially on social media, the information was poorly  
86 communicated, it was distorted and there usually wasn't enough scientific evidence to  
87 demonstrate its validity [12].

88 Taking into account the previously mentioned aspects the paper addresses the issues of  
89 drugs tested and used for the treatment of COVID 19 and how information about COVID 19 was

90 communicated in the offline and online environment. The purpose of the paper is to analyze,  
91 from the perspective of medical staff, the way medical and non - medical information about the  
92 virus was communicated during the pandemic in order to raise awareness about the way  
93 misinformation affected medical staff. Thus, the paper aims at finding an answer to three  
94 research questions: (1) to what extent information about alternative treatments affected the  
95 credibility of medical staff? (2) What is the knowledge of medical staff about the type of drugs  
96 that had positive effects on treating the disease and about alternative treatments? (3) How  
97 satisfied is the medical staff with the way medical and non-medical information was  
98 communicated online and offline during the pandemic? (4) What is the perception of medical  
99 staff about the role of social media in spreading misinformation about the virus? (5) What  
100 aspects of the professional activity of the medical staff were affected most by the COVID – 19  
101 pandemic?

102 Hence, considering the purpose of our paper and the research questions, we believed it  
103 was necessary to analyze the literature on the drugs used to treat COVID – 19, on the role of  
104 social media platforms in spreading fake information about the virus and potential treatments,  
105 and on the way the pandemic influenced the credibility of doctors and their relationship with  
106 their patients.

## 107 **Literature review**

### 108 **Information on drugs used to treat COVID 19**

109 Before analyzing the way information about the virus was communicated in the online  
110 environment, it is important to take a look at the drugs used to treat the disease. Hence, one of  
111 the most important issues that appeared with the COVID 19 pandemic, was finding the right

112 treatment for the virus. In this regard, researchers started to develop many experimental trials  
113 and used diversified drug combinations in order to treat patients with COVID 19. However,  
114 information that was communicated about the effectiveness of certain drugs was often  
115 contradictory.

116 Chloroquine and hydroxychloroquine are two drugs that were tested and included in  
117 many trials. Both drugs were previously used to treat malaria but they also have antiviral  
118 effects on viruses like HIV since they have the ability to prevent the virus to enter in the host  
119 cells [13]. Even though they have similar compounds, chloroquine is taught to have more  
120 negative effects than hydroxychloroquine [14], and hydroxychloroquine is considered safer due  
121 to the fact that it can be tolerated better for a longer period of time [15].

122 While some studies show positive effects of hydroxychloroquine in inhibiting the  
123 infection with the virus in vitro [16, 17], other studies found no influence of the drug on  
124 mortality rate or time spent by patients in the hospital [18]. However, when  
125 hydroxychloroquine was combined with other drugs such as azithromycin, it showed beneficial  
126 effects in treating patients with COVID 19 [19].

127 Nonetheless the findings regarded the effectiveness of these drugs were contrasting.  
128 For example, on March 28 2020 the Food and Drug Administration (FDA) issued an Emergency  
129 Use Authorization for using hydroxychloroquine in treating people suffering from COVID 19  
130 [20], and in June 15 2020, the FDA retracted the authorization stating that the trials in which  
131 the drug was involved showed that the drug had no effect on the faster recovery of patients or  
132 on decreasing chances of death [21]. Even more, on 5th June 2020 the UK trial, Randomised  
133 Evaluation of COVID 19 THERAPY (RECOVERY), also stopped testing the drug on patients

134 because the results showed no benefits in improving the conditions of hospitalized patients  
135 with COVID 19 [22].

136 Studies were carried out with other drugs such as lopinavir/ritonavir, an antiviral drug  
137 used in the treatment of HIV [23]. While in concentration of 4 µg/ml and 50 µg/ml, the drug  
138 showed positive effects against the virus in vitro [24], a study on 199 patients, from which 99  
139 received the drug and the other 100 did not receive the drug, revealed that lopinavir/ritonavir  
140 had no benefits when it comes to diminishing mortality or improving the state of patients with  
141 severe symptoms [25].

142 Controversial discussions also involved the use of Ibuprofen, a Non-steroidal anti-inflammatory  
143 drug that is used to treat fever, or inflammation [26]. Since the pandemic was declared there  
144 has been a preoccupation regarding ibuprofen and its role in making people more vulnerable to  
145 contacting the virus. Thus, right after the declaration of the pandemic, in a letter addressed to  
146 The Lancet Journal, researchers pointed out that ibuprofen could make people with diabetes,  
147 cardiac disease or hypertension more likely to get infected with virus and have severe  
148 symptoms [27]. However, while firstly, WHO recommended people who are infected with the  
149 virus not to take ibuprofen, only one day after that recommendation, on 18 March 2020, WHO  
150 corrected its statement and mentioned that it "does not recommend against ibuprofen" [28].  
151 Even more, a study focusing on the use of ibuprofen showed that the drug does not make  
152 patients feel worse [29] and another study that analyzed the use of ibuprofen and paracetamol  
153 of 403 COVID 19 confirmed patients revealed that compared to paracetamol, ibuprofen did not  
154 aggravated the clinical state of the patients [30].

155           While other drugs failed to show beneficial effects on the treatment of COVID 19, drugs  
156 like dexamethasone, which is included in the UK RECOVERY trial, revealed positive effects on  
157 people suffering from COVID 19: the drug lowered the risk of death in patients on ventilators  
158 from 40% to 28% and in patients who were in need of oxygen, from 25% to 20%, but did not  
159 influence the state of patients who did not need oxygen [31, 32].

160           Another highly tested drug was Remdesivir, an antiviral drug produced by Gilead  
161 Sciences that was previously used in treating Ebola [33]. The information regarding its positive  
162 effects on treating COVID 19 is also contradictory. A study conducted from February 6 2020  
163 until March 12 2020, on 237 patients, showed that the drug did not bring any benefits for  
164 people that had severe symptoms of COVID 19 [34], while a more recent study revealed that  
165 Remdesivir had a more positive effect in reducing the time of recovery in patients with COVID  
166 19 that showed signs of respiratory issues, than it had the placebo effect [35]. However, the  
167 FDA approved on October 22 2020, the use of Remdesivir in the case of adults and also children  
168 aged 12 or older who have at least 44 kilograms, who are infected with the virus and need to be  
169 treated in the hospital [36], and as of November 20 2020, FDA allows, in emergency cases, the  
170 use of Remdesivir in combination with Baricitinib, for adults and children aged two or older that  
171 require oxygen and treatment in the hospital [37].

## 172 **Social media and COVID 19 misinformation**

173           Together with the health crisis, the COVID 19 pandemic generated an information crisis,  
174 often described as an infodemic, that is represented by the spread of fake news, misguided and  
175 false information, especially in the online environment [38].

176 In this context, social media plays an essential role in disseminating information. Social  
177 media consists of internet based channels that provide people with the opportunity to interact,  
178 communicate in asynchronous way and in real time, with either small or large audiences where  
179 value is derived from user generated content [39]. Social media comprises multiple social  
180 networks, which according to Boyd and Ellison, offer users the possibility to create profiles that  
181 are public, or semi-public, to create a list of people with whom they can interact and share  
182 information and to view the list of connections that other users make [40].

183 Social media channels are often used in time of crisis not only by citizen, but also by  
184 official authorities, emergency services, because they can facilitate communication and the  
185 spread of valuable information that can contribute to surpassing the crisis [41]. Social networks  
186 like Facebook, Whatsapp, Twitter, Instagram can function as sources that have the ability to  
187 confirm or complete the information communicated by the authorities, while also receiving  
188 feedback from the public [42]. Thus, sending messages through social media channels is a  
189 strategy that can help authorities obtain feedback on certain proposals regarding public health  
190 policies [43]. Even more, a study regarding the influence of social media on the way people  
191 protect their health during the pandemic, showed that social media can have positive impact on  
192 increasing awareness about public health and protection against the virus [44].

193 However, during the pandemic, while authorities can use social media to keep the  
194 public informed, a major issue generated by social media, that public health representatives  
195 have to face, is the spread of fake news [45].

196 Fake news are represented by fabricated information designed in the form of news  
197 communicated by the media that do not share the same process of organization and do not

198 have the same intent, and fake news are related to misinformation: information that is false or  
199 misleading, and disinformation: a type of false information whose aim is to deceive people [46].

200 Thus, the internet became a favorable environment for spreading conspiracy theories or  
201 false information about alternative treatment for the virus. Since people were stressed and  
202 frightened by the uncertainty of the situation, they started to consider reasonable and valid any  
203 information that presented explanations in regards to the virus [47]. Thus, when referring to  
204 health information, false news often undermine the credibility of official sources, they create  
205 confusion among people and favor the faster spread of the virus [48].

206 Misinformation during the pandemic can negatively influence peoples' health because  
207 false information is not easy to recognize, because it can determine people to change their  
208 behavior in a way that is harmful to their health and those around them. Thus, since the  
209 pandemic was declared, false information has been spread about the origin of the virus, about  
210 what caused it, how it spreads and what treatment is efficient for eliminating it [49]. However,  
211 a study focusing on the WhatsApp platform showed that when the information on social media  
212 is shared by trusted sources, it can increase knowledge about the virus and encourage people  
213 to adopt preventive behavior [50].

214 During the time of crisis, on platforms like WhatsApp or Facebook, more and more false  
215 news and unverified information about the virus began to be shared. With millions of users  
216 worldwide, WhatsApp became one of the platforms where most fake news were shared by  
217 forwarding messages to many users [51], while Facebook was characterized as the core,  
218 epicenter of misinformation [52].



219           When it comes to health misinformation on social media, the most discussed subjects  
220 are alternative cures involving certain food or drinks, hygiene related actions and treatment  
221 drugs. Thus, among the most “recommended” practices for preventing or curing COVID were  
222 drinking hot water every 15 minutes in order for the virus to go into the stomach, eating garlic,  
223 taking vitamin C or even pointing a hairdryer to the nostrils because the heat could eliminate  
224 the virus [53].

225 False news that circulated on social media regarding the virus also involve the idea that the  
226 virus was created on purpose in a lab, three in ten Americans considering true this information  
227 [54].

228           However, many other unverified methods were shared and the most forwarded  
229 messages on WhatsApp presented information about the fact that if people hold their breath  
230 for ten seconds without coughing then they are not infected with the virus, about the idea that  
231 at temperatures of 30-35 Celsius degrees the virus will die, messages about the release of the  
232 vaccine or about drugs allegedly recommended by Chinese doctors that could be efficient in  
233 eliminating the virus [55].

234           Nonetheless, misinformation became a major issue in the context of the pandemic, but  
235 also a subject of interest for researchers. A study focusing on the spread of fake news showed  
236 that most news reconfigure and twist the original information thus creating a different context,  
237 and that most of them contain false information about public authorities and health  
238 organizations [56].

239 Another study found that people who tend to rely on their intuition or who possess little  
240 scientific knowledge about certain subjects, encountered difficulties in differentiating true and

241 false information [57]. Thus, misleading or unverified information can negatively influence the  
242 way people behave. For example, people in USA who died after they consumed chloroquine  
243 may have used the drug because news about it mentioned that it could treat and eliminate the  
244 virus [58]. Even more, a study concerning misinformation on Facebook revealed that posts  
245 made from verified accounts contained more false information than the accounts that were not  
246 verified [59], while other study conducted from 23 April 2020 to 27 April 2020, focused on  
247 perception about contradictory information and stated that 73% of participants mentioned  
248 they observed or were exposed to contrasting messages usually communicated by politicians or  
249 health experts [60].

250         Apart from influencing peoples' beliefs or health practices, COVID 19 fake news also  
251 influenced the activity of health professionals. Social media managed to increase the level of  
252 trust in information that comes from people's personal opinions rather than professionals [61],  
253 and doctor's credibility is often affected. In order to improve these situations, doctors must be  
254 willing to use social media not just to send messages, but to actively communicate with people,  
255 to offer feedback, to share their experiences and rectify and clarify the fake news presented on  
256 social media [62].

257         Among action from health professionals, in order to combat COVID 19 fake news, social  
258 media networks as well as public authorities must implement some strategies. For example, the  
259 government of United Kingdom developed collaboration programs between its rapid response  
260 teams and social media platforms, and Taiwan introduced greater fines for news that were  
261 proven to be false [63]. Moreover, even though some social networks such as Facebook or  
262 Twitter already implemented algorithms to identity and remove fake accounts [64], or to

263 correct information [65], they should further develop efficient strategies in order to validate the  
264 information that people share [66].

265  
266

## 267 **The influence of the pandemic on doctors' credibility and relationship** 268 **with patients**

269 The way information regarding the virus was communicated online and offline during the  
270 pandemic played an essential role in the process of maintaining trust in health professionals. In  
271 this regard, a previous longitudinal study conducted in Poland revealed that trust in physicians  
272 has declined from 2018 – 2020, and emphasized the idea that the decrease may be caused by  
273 the health problems that people had to cope with during the pandemic and the problems with  
274 the healthcare system of the country [67]. In Romanian context, a previous study showed that  
275 the communication process of the healthcare system was poor and confusing, and that public  
276 health authorities at national level focused more on global information about the virus, while  
277 local authorities failed to succeed in providing their “share of information” [68]. Another study,  
278 which focused on analyzing the online communication of Public Health Agencies from Italy,  
279 United States and Sweden, revealed that compared to Sweden and the United States, agencies  
280 from Italy collaborated more with other organizations, and that overall, the communication  
281 process of the agencies was coordinated by their members, that agencies also communicated  
282 with governments, but they rarely collaborated with political or non-governmental  
283 organizations [69]. Hence, while trust in the government and communication from authorized  
284 organizations is essential, the importance of trusting the professionals is highlighted by a study  
285 conducted in Thailand, which showed that in the cases in which people have low levels of trust

286 in the government, trust in professionals can have a positive influence on the adoption of  
287 protective measures at the individual level [70].

288 Furthermore, another previous study conducted in Poland, revealed that information  
289 can have the power to influence the level of trust that people have in the healthcare system  
290 and in healthcare professionals, suggesting that an increase of trust in hospitals, may be  
291 associated with a decrease of trust in physicians [71].

292 While focusing on studying people's response to non- pharmaceutical interventions,  
293 conspiracy theories and alternative treatments, a study conducted in Finland showed that the  
294 level of trust people have in the system implemented in order to provide information about the  
295 virus, has an essential role in the way people react to the official measures recommended.  
296 Hence, most participants in the study were between 40 and 60 years of age, and the study  
297 emphasized that people who were less willing to comply with the non-pharmaceutical  
298 interventions implemented by the government, tended to believe more in conspiracies and had  
299 low levels of trust in the sources which provided information about the virus [72].

300 Another study, which focused on examining the relationship between trust in the  
301 healthcare system and people's choice of seeking medical help when they experienced COVID –  
302 19 symptoms, concluded that high levels of trust in the healthcare system can increase the  
303 probability of asking for medical help when people first notice COVID – 19 symptoms [73].

304 Taking into account the aspects mentioned above, we can infer that peoples' trust in  
305 doctors was affected during the pandemic. In this regard, in the context of misinformation, one  
306 of the reasons why people lost trust in doctors may be the fact that, besides using social media  
307 for communicating information, for networking or for interacting with patients, many medical

308 or dental practitioners used social media to express their professional opinions about the virus,  
309 opinions which were not validated and which later proven to be inaccurate [74]. In other words,  
310 health professionals may have contributed to the spread of misinformation, and such behavior  
311 can contribute to the decrease of trust in medical processes and in healthcare professionals  
312 [75]. Other researchers who focused on examining medical misinformation, found that most  
313 doctors (94.2%) stated that patients had medical misinformation, and the subjects about they  
314 had the most inaccurate information were represented by COVID – 19 vaccines, COVID – 19  
315 origin, treatment or essential oils [76]. Furthermore, a previous study discovered that trust in  
316 doctors increased with age, and communication difficulties decreased, and that trust in doctors  
317 decreased while the level of education and communication difficulties increased [77].

318 Hence, while acknowledging that the pandemic influenced the trust in medical  
319 professionals, another aspect that was negatively influenced was the relationships between  
320 doctors and their patients. A study which focused on examining the doctor – patient interaction  
321 from the perspective of both groups of people, revealed differences in the respondents’  
322 opinions. Thus, most doctors stated that they still make eye contact (72%) and that they still  
323 show patients empathy, but only few patients declared that their doctors made eye contact  
324 (56,8%) or showed them empathy (43,2%) [78].

## 325 **Methods and materials**

### 326 **Sampling and data collection procedures**

327 The present study was conducted on Romanian healthcare professionals including doctors,  
328 nurses and medical students. The questionnaire was administered online, the data was  
329 collected through the help of Google forms, and was disseminated on groups of healthcare

330 professionals and students on platforms such as Facebook and WhatsApp, during the period  
331 April 2021– June 2021. The data we collected was firstly exported to Microsoft Excel, and then  
332 it was analyzed with IBM Statistical Package for the Social Sciences, version 20. At the beginning  
333 of the questionnaire, the respondents were informed about the purpose of the study, about  
334 the fact that they were allowed to withdraw at any time, and they were asked to give their  
335 consent for participating in the study. The average time needed to complete the questionnaire  
336 was 15 minutes, and the research received approval from The Council of the Faculty of  
337 Sociology and Communication, approval request Nr.378/30.03.2021.

338         The sample of our study comprises 536 respondents. Out of the 536 respondents, 460  
339 (85.8%) were female and 76 (14.2%) were male. A total of 411 respondents live in the urban  
340 area (76.7%), while 125 (23.3%) live in the rural area. Most respondents (286, 53.4%) are  
341 between 18 and 35 years of age, 142 respondents (26.5%) are between 36 and 50 years of age,  
342 102 respondents (19.0%) are between 51 and 65 years of age, and 6 of them (1.1) are over 65  
343 years of age. When it comes to the professional degree of the respondents, most of them are  
344 students at a university nursing program (122, 22.8%), and medical students (120, 22.4%).  
345 However, a total of 102 respondents (19.0%) are senior specialists medical – doctors, and 70  
346 (13.1%) are nurses who have a higher education diploma. When it comes to the respondents  
347 field of specialization, most of them (70.5%) operate in the field of general medicine, while  
348 others are family doctors (10.4%), pediatricians (3%), dentists or oncologists (1.9%), surgeons of  
349 doctors who are specialized in internal medicine (1.5%), or infectious disease doctors,  
350 radiologists or cardiologists (1.1%). Furthermore, most of the respondents (77.2%) stated that  
351 they did not work a unit with COVID – 19 patients while few of them (22.8%) stated that they

352 worked in such a unit at the time the research was conducted. Thus, all the characteristics of  
 353 the sample are presented in Table 1.

354 **Table 1.** Sample characteristics (n = 536).

|                         | <b>Category</b>                                | <b>Count</b> | <b>Percentage</b> |
|-------------------------|------------------------------------------------|--------------|-------------------|
| Gender                  | Female                                         | 460          | 88.8%             |
|                         | Male                                           | 76           | 14.2%             |
| Living environment      | Urban                                          | 411          | 76.7%             |
|                         | Rural                                          | 125          | 23.3%             |
| Age                     | 18-35 years old                                | 286          | 53.4%             |
|                         | 36-50 years old                                | 142          | 26.5%             |
|                         | 51 -65 years old                               | 102          | 19.0%             |
|                         | Over 65 years old                              | 6            | 1.1%              |
| Professional degree     | Senior specialist medical - doctor             | 102          | 19.0%             |
|                         | Specialist medical - doctor                    | 46           | 8.6%              |
|                         | Resident                                       | 28           | 5.2%              |
|                         | Nurse with higher education diploma            | 70           | 13.1%             |
|                         | Nurse with other studies than higher education | 48           | 9.0%              |
|                         | Medical student                                | 120          | 22.4%             |
|                         | Student at university nursing program          | 122          | 22.8%             |
|                         |                                                |              |                   |
| Field of specialization | General medicine                               | 378          | 70.5%             |
|                         | Family doctor                                  | 56           | 10.4%             |
|                         | Pediatrics                                     | 16           | 3%                |
|                         | Stomatology                                    | 10           | 1.9%              |
|                         | Oncology                                       | 10           | 1.9%              |
|                         | Surgery                                        | 8            | 1.5%              |
|                         | Internal medicine                              | 8            | 1.5%              |
|                         | Virology/ infectious disease doctor            | 6            | 1.1%              |
|                         | Cardiology                                     | 6            | 1.1%              |
|                         | Radiology                                      | 6            | 1.1%              |

|                          | Other | 32  | 6%    |
|--------------------------|-------|-----|-------|
| Works in a unit          | Yes   | 122 | 22.8% |
| with COVID – 19 patients | No    | 414 | 77.2% |

355

356

### 357 **The research instrument**

358 In order to conduct the research we used a quantitative method while having a questionnaire  
359 as an instrument. In this regard, we developed a questionnaire which comprises four sections:  
360 A. Influence of the pandemic on the professional activity of medical staff (items A1 to A4), B.  
361 Perception about the authorities' communication process (items B1 to B11), C. Perception  
362 about the communication of non- validated treatments (items C1 to C20), and D.  
363 Sociodemographic questions (items D1 – D9), such as: gender, age, living environment,  
364 professional degree, field of specialization. The sociodemographic questions were used in order  
365 to identify different or similar attitudes between specific groups. The questionnaire can be  
366 found in “S1.Appendix English version of the questionnaire”, and in “S2. Appendix Romanian  
367 version of the questionnaire.” Before disseminating the questionnaire, the instrument was  
368 tested on 30 doctors who work in the field of cardiology and general medicine. The  
369 respondents understood clearly the questions and did not report any issue in the process of  
370 answering them. Hence, the questionnaire comprises close ended and open ended questions  
371 (Items A1, A4,B3, B11, C19, C20, D2, D5, D6,) dihotomic questions as well as questions whose  
372 answers were measured on a 7 point Likert scale. For example, item A2 measured the extent to  
373 which the respondents considered that the pandemic influenced the way they carried out their



374 professional activity (1- “to an extremely little extent, 7 “to an extremely great extent”), or item  
375 B2 measure the respondents’ level of agreement with statements regarding the way authorities  
376 communicated during the pandemic (1 – “strongly disagree, 7-“ strongly agree”).

377

## 378 **Data analysis**

379 Data was analyzed with IBM Statistical Package for the Social Sciences, version 20. In order to  
380 analyze the data and identify differences and similarities between the attitudes of certain  
381 groups, t tests for independent samples were performed. The t test were performed among  
382 groups: male/female, working in unit with COVID – 19 patients/ not working in unit with COVID  
383 – 19 patients, urban/rural area, and professional degree: medical staff/students. Hence, in  
384 order to be able to analyze the results depending on professional degree, we computed the  
385 variable of professional degree which had the following values: senior specialist medical –  
386 doctor, specialist medical – doctor, resident, nurse with higher education diploma, nurse with  
387 other studies than higher education, medical student, student at university nursing program, in  
388 a new variable. Thus, doctors, nurses and residents, were integrated in a new group called  
389 “medical staff”, while medical students and students at university nursing programs were  
390 integrated in the group “students”. Moreover, for a better understanding of the way some  
391 variables correlate with each other, (for example: respondents satisfaction with the way  
392 authorities communicated during the pandemic and age, respondents’ opinion about the way  
393 misinformation about alternative treatments influenced doctors’ credibility and age), we also  
394 calculated the Pearson coefficient.

395 **Results**

396 **1) To what extent information about alternative treatments affected**  
397 **the credibility of medical staff?**

398  
399 The results of our research revealed that respondents were of the opinion that information  
400 about alternative treatments for COVID -19 affected the credibility of healthcare professionals.  
401 Hence, most respondents (32.5%), stated that trust in healthcare professionals was affected to  
402 a an extremely great extent by the information about alternative treatments, many of them  
403 declared that credibility was affected to a very great extent (23.1%), and to a great extent  
404 (21.3%) (Table 1).

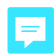

**Table 1.** The extent to which information about alternative treatments affected trust in physicians

|                                            | Frequency | Percent | Valid Percent | Cumulative Percent |
|--------------------------------------------|-----------|---------|---------------|--------------------|
| Valid to an extremely little extent        | 14        | 2.6     | 2.6           | 2.6                |
| to a very little extent                    | 10        | 1.9     | 1.9           | 4.5                |
| to a little extent                         | 42        | 7.8     | 7.8           | 12.3               |
| nor to a little, neither to a great extent | 58        | 10.8    | 10.8          | 23.1               |
| to a great extent                          | 114       | 21.3    | 21.3          | 44.4               |
| to a very great extent                     | 124       | 23.1    | 23.1          | 67.5               |
| to an extremely great extent               | 174       | 32.5    | 32.5          | 100.0              |
| Total                                      | 536       | 100.0   | 100.0         |                    |

405  
406 Furthermore, the Pearson correlation performed between the extent to which  
407 respondents believed that information about alternative treatments affected people’s trust in  
408 doctors and the age of the respondents, revealed a weak, negative and statistically significant  
409 correlation between the two variables ( $r(534) = -.155, p=0.001$ ) (Table 2). Hence, as the age of

410 the medical staff decreases, the extent to which they believe the credibility of doctors was  
 411 affected increases. In other words, compared to older healthcare professionals, younger  
 412 healthcare professionals tend to believe more that information about alternative treatments  
 413 affected trust in doctors. One possible explanation for this result can be that younger people  
 414 tend to be fonder of keeping up with trends and being up to date, and in this context, it is  
 415 possible that they came into contact more frequently with information about certain  
 416 alternative treatments for COVID – 19, this making them more aware about the way such  
 417 treatments can undermine doctor’s credibility.

**Table 2.** Pearson correlation between information about alternative treatments and age

|                                                                                                | C14. The extent to which information about alternative treatments affected trust in physicians | D2. Age |
|------------------------------------------------------------------------------------------------|------------------------------------------------------------------------------------------------|---------|
| C14. The extent to which information about alternative treatments affected trust in physicians | Pearson Correlation                                                                            | 1       |
|                                                                                                | Sig. (2-tailed)                                                                                | -.155** |
|                                                                                                | N                                                                                              | .000    |
| D2. Age                                                                                        | Pearson Correlation                                                                            | 536     |
|                                                                                                | Sig. (2-tailed)                                                                                | -.155** |
|                                                                                                | N                                                                                              | 1       |
|                                                                                                |                                                                                                | .000    |
|                                                                                                |                                                                                                | 536     |

\*\* . Correlation is significant at the 0.01 level (2-tailed).

418  
 419 In order to observe if there any differences in the opinion of the respondents depending  
 420 on certain variables including, age, gender, or living environment, we performed t tests for  
 421 independent samples. The results of the significant t tests (Table 3), showed that students  
 422 believed to a greater extent (M= 5.60, SD=1.49), that information about alternative treatments  
 423 negatively affects the credibility of doctors, than the medical staff (M=5.33, SD=1.54). Also,  
 424 respondents who declared they worked in a unit without COVID – 19 patients (M=5.53,

SD=1.49), were more of the opinion that information about alternative cures affected trust in health professionals, than respondents who worked in a unit with COVID – 19 patients (M=5.19, SD=1.61). One possible explanation would be that, doctors who interacted with COVID – 19 patients may have observed that when being put in the situation to receive medical care in the hospital, patients still had faith and trust in doctors. Moreover, another explanation is that respondents who did not come into contact with COVID – 19 patients were not that close with the situation and thus they might have had a more distorted perception about the situation than those professionals who interacted with COVID – 19 patients. Moreover, the results of the research also showed that female respondents (M=5.51, SD=1.48), believed more than male respondents (M=5.10, SD=1.70), that trust in healthcare professionals was affected by the information about alternative treatments.

**Table 3.** Significant t-test results: comparisons between variables

|                                                                             | Group                          | N   | Mean | S. D. | t     | df  | p   | t-test for Equality of Means |                       |           |       |
|-----------------------------------------------------------------------------|--------------------------------|-----|------|-------|-------|-----|-----|------------------------------|-----------------------|-----------|-------|
|                                                                             |                                |     |      |       |       |     |     | Mean Difference              | Std. Error Difference | CI4 Lower | Upper |
| Information about alternative treatments _ Professional degree <sup>1</sup> | Medical staff                  | 294 | 5.33 | 1.54  | -2.04 | 534 | .04 | -.27                         | .13                   | -.52      | -.01  |
|                                                                             | Student                        | 242 | 5.60 | 1.49  |       |     |     |                              |                       |           |       |
| Information about alternative treatments _working unit                      | Unit with COVID -19 patients   | 122 | 5.19 | 1.61  | -2.13 | 534 | .03 | -.33                         | .15                   | -.64      | -.02  |
|                                                                             | Unit without COVID 19 patients | 414 | 5.53 | 1.49  |       |     |     |                              |                       |           |       |
| Information about alternative treatments _gender                            | Male                           | 76  | 5.10 | 1.70  | -2.16 | 534 | .03 | -.40                         | .18                   | -.77      | -.03  |
|                                                                             | Female                         | 460 | 5.51 | 1.48  |       |     |     |                              |                       |           |       |

437 <sup>1</sup>Index variable from the professional degrees of respondents. Student: medical student and student at university  
438 nursing program, Medical Staff: Senior specialist medical – doctor, Specialist medical – doctor, Resident, Nurse  
439 with higher education diploma, Nurse with other studies than higher education  
440

441 **2) What is the knowledge of medical staff about the type of drugs that**  
442 **had positive effects on treating the disease and about alternative**  
443 **treatments?**  
444

445 Considering the type of drugs which were known to have positive effects on treating the virus,  
446 the research revealed that type of drug about which the respondents have heard it had positive  
447 effects against the virus was Dexamethasone (46.6%), closely followed by Remdesivir (40.5%)  
448 and Azithromicin (38.4%). However, some of the respondents also mentioned Chloroquine,  
449 Hydroxychloroquine (23.1%), Ibuprofen (19.8%), Tocilizumab (15.9%), and Favipiravir (13.8%) as  
450 drugs known to have positive effects when dealing with COVID – 19 (Table 4). Hence, the  
451 research showed that the medical staff had knowledge about the type of drugs tested or used  
452 against the virus, which were taught to be efficient in treating the disease.

453 **Table 4.** Drugs known to have positive effects in treating the virus: the perception of medical  
454 staff

|                                        | Frequency | Valid percent |
|----------------------------------------|-----------|---------------|
| Amoxicillin                            | 36        | 6.7%          |
| Azithromicin                           | 206       | 38.4%         |
| Chloroquine,<br>Hydroxychloroquine     | 124       | 23.1%         |
| Dexamethasone                          | 250       | 46.6%         |
| Doxycycline                            | 32        | 6.0%          |
| Favipiravir                            | 74        | 13.8%         |
| Ibuprofen                              | 106       | 19.8%         |
| Lopinavir/Ritonavir                    | 56        | 10.4%         |
| Oseltamivir, Peramivir<br>or Zanamivir | 32        | 6.0%          |
| Remdesivir                             | 217       | 40.5%         |
| Tocilizumab                            | 85        | 15.9%         |

|            |    |      |
|------------|----|------|
| Umifenovir | 17 | 3.2% |
|------------|----|------|

455

456 In the context of respondents’ perception about alternative methods of preventing and treating  
 457 the virus, the findings show that, most of them stated that they heard about the fact that  
 458 alcohol consumption can prevent the infection with the virus (24.3%), that drinking warm water  
 459 every 15 minutes may help eliminate the virus (21.3%), but also that pointing the hot air of the  
 460 hairdryer to the nostrils leads to the elimination of the virus (16.8%) (Table 5).

**Table 5.** Medical staff’s knowledge about alternative methods of preventing and treating the virus

|                                                                        | Frequency | Percent | Valid Percent | Cumulative Percent |
|------------------------------------------------------------------------|-----------|---------|---------------|--------------------|
| drinking alcohol helps you eliminate the virus                         | 79        | 14.7    | 14.7          | 14.7               |
| drinking alcohol prevents the infection with the virus                 | 130       | 24.3    | 24.3          | 39.0               |
| rinsing the nostrils with disinfectant eliminates the virus            | 81        | 15.1    | 15.1          | 54.1               |
| Valid drinking hot water every 15 minutes eliminates the virus         | 114       | 21.3    | 21.3          | 75.4               |
| pointing hot air to the nostrils leads to the elimination of the virus | 90        | 16.8    | 16.8          | 92.2               |
| other                                                                  | 42        | 7.8     | 7.8           | 100.0              |
| Total                                                                  | 536       | 100.0   | 100.0         |                    |

461

462 **3) How satisfied is the medical staff with the way medical and non-**  
 463 **medical information was communicated during the pandemic?**

464

465 The findings of the study revealed that respondents were mostly dissatisfied with the way  
 466 medical and non – medical information was communicated during the pandemic. Hence, the

467 sum of the responses with negative valences of the study participants (extremely dissatisfied,  
 468 very dissatisfied and dissatisfied), showed that 238 of them, (44.4%) were dissatisfied with the  
 469 process of sending medical and non- medical information, while the sum of the positive  
 470 responses (satisfied, very satisfied, extremely satisfied) showed that 162 of them (30.2%),  
 471 were satisfied with the communication process (Table 6). In other words, the study highlighted  
 472 that respondents registered mostly low level of satisfaction with the way information was sent  
 473 during the pandemic.

474

**Table 6.** The level of satisfaction with the way information about drugs used to treat the virus were communicated at national level

|                                        | Frequency | Percent | Valid Percent | Cumulative Percent |
|----------------------------------------|-----------|---------|---------------|--------------------|
| extremely dissatisfied                 | 52        | 9.7     | 9.7           | 9.7                |
| very dissatisfied                      | 76        | 14.2    | 14.2          | 23.9               |
| dissatisfied                           | 110       | 20.5    | 20.5          | 44.4               |
| Nor dissatisfied,<br>neither satisfied | 136       | 25.4    | 25.4          | 69.8               |
| satisfied                              | 108       | 20.1    | 20.1          | 89.9               |
| very satisfied                         | 30        | 5.6     | 5.6           | 95.5               |
| Extremely satisfied                    | 24        | 4.5     | 4.5           | 100.0              |
| Total                                  | 536       | 100.0   | 100.0         |                    |

475

476 Furthermore, in the context of the medical staff's satisfaction with the way information  
 477 about drugs used to treat the virus was communicated at national level, the research showed  
 478 that as age of the respondents decreases, the level of satisfaction increases ( $r(534) = -.091$ ,  
 479  $p=0.035$ ) (Table 7). Thus, according to this result, it can be inferred that younger people were  
 480 more satisfied than older people, with how information about drugs used to treat the virus was  
 481 communicated.

**Table 7.** Pearson Correlation: satisfaction with the way information about drugs used to treat the virus was communicated and age

|                                                                                                 |                     | B10. Satisfaction with the way information about drugs used to treat the virus was communicated | D2. Age |
|-------------------------------------------------------------------------------------------------|---------------------|-------------------------------------------------------------------------------------------------|---------|
| B10. Satisfaction with the way information about drugs used to treat the virus was communicated | Pearson Correlation | 1                                                                                               | -.091*  |
|                                                                                                 | Sig. (2-tailed)     |                                                                                                 | .035    |
|                                                                                                 | N                   | 536                                                                                             | 536     |
| D2. Age                                                                                         | Pearson Correlation | -.091*                                                                                          | 1       |
|                                                                                                 | Sig. (2-tailed)     | .035                                                                                            |         |
|                                                                                                 | N                   | 536                                                                                             | 536     |

\*. Correlation is significant at the 0.05 level (2-tailed).

482

483

Moreover, when asked to evaluate the efficiency of the communication strategies

484

adopted by authorities in order to send information about the virus, most respondents stated

485

that the strategies were effective. Thus, the sum of the responses with negative valences shows

486

that 144 of them (26, 9%) described the communication strategies as inefficient, while 266 of

487

them (49, 6%) described them as efficient (Table 8). One interesting result of the analysis, was

488

that, when trying to examine if the responses of the study participants about the efficiency of

489

communication strategies differ depending on certain variables such as working unit, gender,

490

working unit, living environment, the analysis found no differences between the responses of

491

males and females, of people working in units without COVID – 19 patients and people not

492

working in units with COVID – 19 patients, or in people from the rural and urban area.



**Table 8.** Perception about the efficiency of communication strategies adopted by authorities

|                                          | Frequency | Percent | Valid Percent | Cumulative Percent |
|------------------------------------------|-----------|---------|---------------|--------------------|
| Extremely inefficient                    | 22        | 4.1     | 4.1           | 4.1                |
| very inefficient                         | 38        | 7.1     | 7.1           | 11.2               |
| inefficient                              | 84        | 15.7    | 15.7          | 26.9               |
| Valid nor efficient, neither inefficient | 126       | 23.5    | 23.5          | 50.4               |
| efficient                                | 134       | 25.0    | 25.0          | 75.4               |
| very efficient                           | 80        | 14.9    | 14.9          | 90.3               |
| extremely efficient                      | 52        | 9.7     | 9.7           | 100.0              |
| Total                                    | 536       | 100.0   | 100.0         |                    |

493

494 In the context of the information about drugs tested and used in the treatment against COVID –  
 495 19, the results showed that students believe to a greater extent that such information was  
 496 communicated in a coherent manner (M=4.05, SD=1.63), than the medical staff (M=3.79,  
 497 SD=1.53) (t(534)= -2.05, p<0.05) (Table 9.). Hence, one possible explanation for this result  
 498 would be that, due the experience and knowledge of the medical staff, people who were  
 499 already working in the healthcare system, such people have greater expectations from  
 500 authorities when it comes to sending medical information, than medical students.

501 **Table 9. Significant t test for information about drugs used to treat the virus and professional**

502 **degree**

|                                                                                                              | Group         | N   | Mean | S. D. | t     | df  | p   | t-test for Equality of Means |                       |          |       |
|--------------------------------------------------------------------------------------------------------------|---------------|-----|------|-------|-------|-----|-----|------------------------------|-----------------------|----------|-------|
|                                                                                                              |               |     |      |       |       |     |     | Mean Difference              | Std. Error Difference | Lower CI | Upper |
| Information about drugs tested and used to treat the disease <sup>1</sup> _ Professional degree <sup>2</sup> | Medical staff | 294 | 3.79 | 1.53  | -2.05 | 534 | .03 | -.28                         | .13                   | -.55     | -.01  |
|                                                                                                              | Student       | 242 | 4.05 | 1.63  |       |     |     |                              |                       |          |       |

503 <sup>1</sup> The extent to which respondents believe that information about drugs tested and used to treat the virus  
 504 was communicated in a coherent manner  
 505 <sup>2</sup> Index variable from the professional degrees of respondents. Student: medical student and student at  
 506 university nursing program, Medical Staff: Senior specialist medical – doctor, Specialist medical – doctor,  
 507 Resident, Nurse with higher education diploma, Nurse with other studies than higher education  
 508

509 **(4) What is the perception of medical staff about the role of social**  
 510 **media in spreading misinformation about the virus?**

511  
 512 The results of the research revealed that respondents were inclined to believe more that social  
 513 media was a proper environment for spreading fake medical information during the pandemic.  
 514 By analyzing the information from Table 10, it can be observed that the sum of the responses  
 515 with negative valences (4.5%) (to an extremely little extent, to a very little extent and to a little  
 516 extent) is much lower than the sum of the responses with positive valences (89.9%) ( to an  
 517 extremely great extent, to a very great extent, to a great extent). Hence, most participants of  
 518 the study believe that social media platforms favored the transmission of fake medical news  
 519 during the pandemic. Furthermore, when trying to find differences in the responses of the  
 520 participants depending on age, gender, living environment, professional degree or working unit  
 521 (with COVID – 19 patients or without COVID – 19 patients), we observed that their responses  
 522 did not differ depending on such variables. Thus, it can be inferred that, regardless of age,  
 523 gender, living environment, professional degree or working unit, respondents’ perception was  
 524 that social media had a role in spreading fake medical information.

**Table 10.** Perception about the extent to which social media contributed to the spread of medical fake news

|       | Frequency                     | Percent | Valid Percent | Cumulative Percent |
|-------|-------------------------------|---------|---------------|--------------------|
| Valid | to an extremely little extent | 2       | .4            | .4                 |
|       | to a very little extent       | 10      | 1.9           | 2.2                |
|       | to a little extent            | 12      | 2.2           | 4.5                |

|                                               |     |       |       |       |
|-----------------------------------------------|-----|-------|-------|-------|
| nor to a little, neither<br>to a great extent | 30  | 5.6   | 5.6   | 10.1  |
| to a great extent                             | 62  | 11.6  | 11.6  | 21.6  |
| to a very great extent                        | 88  | 16.4  | 16.4  | 38.1  |
| to an extremely great<br>extent               | 332 | 61.9  | 61.9  | 100.0 |
| Total                                         | 536 | 100.0 | 100.0 |       |

525  
526           However, even though respondents were of the opinion that social media was an  
527 environment in which was sent fake medical information, some of them still believe that social  
528 media platforms are appropriate for sending official information about the virus. Thus,  
529 considering the results from Table 11, the sum of responses with positive valences (40.3%) is  
530 almost equal to the sum of responses with negative valences (45.1%) meaning that the opinions  
531 of the study participants were divided when it comes to sending official information about the  
532 virus on social media.

**Table 11.** Perception about the extent to which social media represents an appropriate environment for sharing official COVID – 19 information

|                                                       | Frequency | Percent | Valid Percent | Cumulative Percent |
|-------------------------------------------------------|-----------|---------|---------------|--------------------|
| to an extremely little<br>extent                      | 86        | 16.0    | 16.0          | 16.0               |
| to a very little extent                               | 78        | 14.6    | 14.6          | 30.6               |
| to a little extent                                    | 52        | 9.7     | 9.7           | 40.3               |
| Valid   nor to a little, neither<br>to a great extent | 78        | 14.6    | 14.6          | 54.9               |
| to a great extent                                     | 72        | 13.4    | 13.4          | 68.3               |
| to a very great extent                                | 74        | 13.8    | 13.8          | 82.1               |
| to an extremely great<br>extent                       | 96        | 17.9    | 17.9          | 100.0              |
| Total                                                 | 536       | 100.0   | 100.0         |                    |

533  
534           A factor which showed a weak but statistically significant influence on respondents' opinion  
535 about sending COVID – 19 official information on social media was age. Hence, the results of

536 the Pearson correlation ( $r(534) = -.175, p=0.000$ ), showed that as age decreases, the extent to  
 537 which respondents believed that social media is an environment in which official information  
 538 about the virus should be communicated decreases (Table 12). In other words, younger  
 539 respondents believed to a greater extent than older respondents that official information  
 540 should also be communicated on social media. One possible explanation for this results would  
 541 be that young people gather most of their information from online sources, and they also  
 542 engage more with social media platforms, and thus it is possible that they would also like to see  
 543 official and important information on such platforms.

**Table 12. Person correlation between the extent to which social media represents an appropriate environment for sharing official COVID – 19 info and age**

|                                                                                                                 |                     | C1. The extent to which social media represents an appropriate environment for sharing official COVID – 19 info | D2. Age |
|-----------------------------------------------------------------------------------------------------------------|---------------------|-----------------------------------------------------------------------------------------------------------------|---------|
| C1. The extent to which social media represents an appropriate environment for sharing official COVID – 19 info | Pearson Correlation | 1                                                                                                               | -.175** |
|                                                                                                                 | Sig. (2-tailed)     |                                                                                                                 | .000    |
|                                                                                                                 | N                   | 536                                                                                                             | 536     |
|                                                                                                                 | Pearson Correlation | -.175**                                                                                                         | 1       |
| D2. Age                                                                                                         | Sig. (2-tailed)     | .000                                                                                                            |         |
|                                                                                                                 | N                   | 536                                                                                                             | 536     |

\*\* . Correlation is significant at the 0.01 level (2-tailed).

544  
 545 Furthermore, when dividing the study participants in medical staff (doctors, nurses) and  
 546 students (medical students or students at the university nursing programs), we found that  
 547 students ( $M=4.31, SD=2.11$ ) believed to a greater extent than the medical staff ( $M= 3.88,$   
 548  $SD=2.07$ ) that official information about the virus should also be sent on social media ( $t(534) = -$

2.36,  $p < 0.05$ ) (Table 13). Next, when dividing the sample by living environment, participants living in the urban area ( $M=4.19$ ,  $SD=2.10$ ) were inclined more than those living in the rural area ( $M=3.72$ ,  $SD=2.05$ ), to believe that official information could also be sent on social media ( $t(534) = 2.23$ ,  $p < 0.05$ ) (Table 13).

**Table 13. Significant t tests for sharing official information on social media professional degree and living environment**

|                                                                         | Group         | N   | Mean | S. D. | t     | df  | p   | t-test for Equality of Means |                       |       |       |
|-------------------------------------------------------------------------|---------------|-----|------|-------|-------|-----|-----|------------------------------|-----------------------|-------|-------|
|                                                                         |               |     |      |       |       |     |     | Mean Difference              | Std. Error Difference | Lower | Upper |
| Official information on social media _ Professional degree <sup>1</sup> | Medical staff | 294 | 3.88 | 2.07  | -2.36 | 534 | .01 | -.42                         | .18                   | -.78  | -.07  |
|                                                                         | Student       | 242 | 4.31 | 2.11  |       |     |     |                              |                       |       |       |
| Official information on social media _ living environment               | Urban area    | 411 | 4.19 | 2.10  | 2.23  | 534 | .02 | .47                          | .21                   | .05   | .89   |
|                                                                         | Rural area    | 125 | 3.71 | 2.05  |       |     |     |                              |                       |       |       |

<sup>1</sup>Index variable from the professional degrees of respondents. Student: medical student and student at university nursing program, Medical Staff: Senior specialist medical – doctor, Specialist medical – doctor, Resident, Nurse with higher education diploma, Nurse with other studies than higher education

### **(5) What aspects of the professional activity of the medical staff were affected most by the COVID – 19 pandemic?**

The findings of our research showed that most respondents stated that the patient – doctor relationship was most affected by the pandemic (38.4%). However, a smaller percent of respondents declared that the working schedule was the most affected (26.9%), or the collaboration with their peers (23.9%) (Table 14).

**Table 14. The aspect of professional life which was most influenced by the pandemic**

| Frequency | Percent | Valid Percent | Cumulative Percent |
|-----------|---------|---------------|--------------------|
|-----------|---------|---------------|--------------------|

|       |                               |     |       |       |       |
|-------|-------------------------------|-----|-------|-------|-------|
|       | patient – doctor relationship | 206 | 38.4  | 38.4  | 38.4  |
|       | work schedule                 | 144 | 26.9  | 26.9  | 65.3  |
| Valid | collaboration with peers      | 128 | 23.9  | 23.9  | 89.2  |
|       | other                         | 58  | 10.8  | 10.8  | 100.0 |
|       | Total                         | 536 | 100.0 | 100.0 |       |

566  
567 Furthermore, taking into account the group of medical staff (doctors, nurses) and the group of  
568 students ( medical students and students at university nursing program), the results revealed  
569 that the most respondents who stated that the patient- doctor relationship was affected most  
570 by the pandemic was the group of medical staff (144 compared to 62) (Table 15). One possible  
571 explanation for this result is that, by being in constant contact with their patients, doctors and  
572 nurses were more inclined to perceive that the relation with their patients has deteriorated  
573 during the pandemic.

574  **Table 15.** Main aspect of professional life influenced by the pandemic \*  
professional degree - Cross tabulation

|                                                                 |                               | Professional degree <sup>1</sup> |         | Total |
|-----------------------------------------------------------------|-------------------------------|----------------------------------|---------|-------|
|                                                                 |                               | Medical staff                    | Student |       |
| A3. Main aspect of professional life influenced by the pandemic | patient – doctor relationship | 144                              | 62      | 206   |
|                                                                 | work schedule                 | 70                               | 74      | 144   |
|                                                                 | collaboration with peers      | 62                               | 66      | 128   |
|                                                                 | other                         | 18                               | 40      | 58    |
| Total                                                           |                               | 294                              | 242     | 536   |

575 <sup>1</sup>Index variable from the professional degrees of respondents. Student: medical student and student at university  
576 nursing program, Medical Staff: Senior specialist medical – doctor, Specialist medical – doctor, Resident, Nurse  
577 with higher education diploma, Nurse with other studies than higher education

578  
579  
580

## 581 **Discussion**

582 During the COVID – 19 pandemic, one of the major issues people had to face, was the spread of  
583 misinformation about the virus, its origins and its treatment. In this regard, we analyzed the  
584 perception of medical staff (including doctors, nurses, medical students and students in the  
585 university nursing program) about the way medical and non – medical information was  
586 communicated during the pandemic. In the context of the so called infodemic [11], and the  
587 effects of misinformation on people’s trust in doctors, most participants of our study declared  
588 that the information about alternative treatments for the virus affected the credibility of health  
589 professionals. Hence, from this point of view, our study is in line with previous studies which  
590 highlighted the fact that lately, trust in physician decreased [67], and which suggested that  
591 social media managed to determine people to trust the personal opinions of other people  
592 rather than the opinion of the professionals [61]. Furthermore, since other researchers pointed  
593 out that many medical practitioners used social media to express professional opinions that  
594 were later found inaccurate [74], and thus they may have contributed to the spread of  
595 misinformation [75], we argue that the credibility of physicians might have also been affected  
596 by this type of behavior.

597 An interesting result of our research showed that as the age of medical staff decreases,  
598 the extent to which they believe that information about alternative treatments affects doctors’  
599 credibility increases. Hence, younger healthcare professionals believed to a greater extent than  
600 older healthcare professionals, that information about alternative treatments affected  
601 negatively people’s trust in doctors. This results might have as possible explanation, the fact  
602 that younger people tend to spend more time on social media platforms, and they may have

603 interacted more than older professionals, with misinformation about the virus, this making  
604 them more able to be aware of the negative effects of fake news. Moreover, the type of unit in  
605 which the respondents worked, was a factor which influenced the opinion of the respondents,  
606 our findings showing that, the medical staff who did not work in unit with COVID -19 patients,  
607 believed to a greater extent than those who worked in such units, that information about  
608 alternative treatments negatively influenced doctors' credibility. Given this result we argue that  
609 is it possible for those professionals who did not interact with COVID -19 patients, and who thus  
610 were more distant from the situation, to have a more distorted image regarding the way  
611 people's levels of trust in them changed in the context of the pandemic.

612         Considering the role of social media in spreading misinformation, our study is in line  
613 with previous studies which support the idea that such channels favored the communication of  
614 fake news during the pandemic [49, 50, 51]. In this regard, regardless of age, professional  
615 degree or living environment, most healthcare professionals who participated in our study were  
616 of the opinion that social media contributed to the spread of misinformation. However, our  
617 study also showed that when it comes to communicating official information on social media,  
618 younger respondents (students) believed to a greater extent than older respondents (doctors,  
619 nurses), that such channels should be used to send official information about the virus. Taking  
620 into account these results, the fact that healthcare professionals acknowledge that social media  
621 favors the spread of misinformation, and that many of them still believe they should be used in  
622 order to communicate official information, shows that at personal level, professionals were not  
623 affected that much by misinformation, them being able to differentiate more easily between  
624 real and fake news. In other words, we argue that while people in general were negatively



625 influenced by the fake news they read on social media, as it was shown in previous studies  
626 which highlighted that people trusted the information on social networks, they shared un-  
627 validated information and had trouble with differentiating real from fake news [57, 79] or that  
628 exposure to health misinformation may influence people's intention to engage in certain  
629 behaviors [80], healthcare professionals may be less influenced by fake news, due to their  
630 knowledge.

631         Considering the knowledge of medical staff about the type of drugs that had positive  
632 effects on treating the virus, the findings of the research showed that the respondents had  
633 opinions which were in line with the results found in other studies. Hence, according to the  
634 research, most respondents stated that the drug which was known to have positive effects  
635 against the virus was Dexamethasone (46.6%), it being followed by Remdesivir (40.5%). Thus,  
636 positive effects of Dexamethasone were also highlighted by studies [31, 32], while study [35]  
637 showed positive effects of Remdesivir.

638         In the context of medical staff's knowledge about alternative treatments, most  
639 respondents declared they had heard about the fact that alcohol can prevent the infection, that  
640 warm water drunk every 15 minutes, and the hot air from the hairdryer pointed to the nostrils  
641 can help eliminate the virus. From this point of view, our study is in line with a previous study  
642 [53], which also described these methods.

643         When it comes to the respondents' level of satisfaction about the way medical and non  
644 – medical information was communicated during the pandemic, generally, the research  
645 revealed that most respondents were dissatisfied with the communication process. In the case  
646 of communication strategies adopted by authorities, the results showed that most respondents

647 were satisfied with them. However, in the context of sending information about the drugs used  
648 to treat the disease, the research showed that younger healthcare professionals were more  
649 satisfied with the communication process than older healthcare professionals. This results  
650 might be due to the fact that physicians with more experience have higher expectations from  
651 authorities than students.

652 Another area on which we focused our research was the professional activity of the  
653 medical staff during the pandemic. In this regard, our findings revealed that, according to the  
654 respondents of our study, the aspect that was mostly affected by the pandemic was the doctor-  
655 patient relationship. Hence, our research is in line with other studies [78], which showed that  
656 the pandemic affected the way doctors interacted with their patients.

657 Furthermore, on the basis of the results of our study we argue that not only the process  
658 of vaccination created ethical issues, but also the process of communication [81]. Thus, these  
659 ethical issues were perceived by the medical staff and they would require a further examination  
660 in order to be able to create communication guides which can be regarded as essential  
661 instruments not only for the research process of the medical staff and healthcare professionals  
662 with management positions, but also for their current medical activity [82,83].

## 663 **Conclusions**

664 During the pandemic, healthcare professionals did not have to deal only with challenges  
665 regarding their health and the health of their patients, but also with the problems created by  
666 the spread of medical misinformation. In this regard, besides fighting the pandemic, physician  
667 also had to fight the so called infodemic. Fake news spread on social media about various  
668 alternative treatments for the virus and the opinions of certain professionals about treatment

669 methods which later proven to be inaccurate negatively influenced the credibility of doctors.  
670 Hence, according to the results of our research, generally, the medical staff (doctors, nurses,  
671 medical students, students at university nursing program), believed that information about  
672 alternative treatments affected people's trust in doctors, but younger healthcare professionals  
673 and those working in units without COVID - 19 patients believed to a greater extent than older  
674 healthcare professionals and people working in units with COVID – 19 patients that fake news  
675 about treatments for the virus affected the credibility of doctors.

676 Furthermore, regardless of age, age, gender, living environment, professional degree or  
677 working unit, the medical staff acknowledged the role of social media in spreading fake news,  
678 but when it comes to using social media in order to communicate official information, younger  
679 healthcare professionals were more inclined to believe that such networks were appropriate  
680 for the communication of official information. This results can suggest that while professionals  
681 were aware of the role of social media in spreading medical misinformation and in affecting  
682 trust in doctors, due to their knowledge, at personal level they were less affected by that type  
683 of information, many of them believing that social media should also be used for sending  
684 official information.

685 In the context of the drugs used to treat the virus, the results pointed out that the  
686 medical staff had knowledge about the drugs known to have positive effects in treating the  
687 virus, their perception being in line with previous studies which focused on this matter.  
688 Moreover, the medical staff was aware of the alternative treatments which were promoted on  
689 social media, the method of drinking alcohol in order to prevent the infection being the method  
690 that most of the respondents have heard about.

691           When it comes to the influence of the pandemic on the professional activity of the  
692 medical staff, the respondents declared that the aspect which was most affected was the  
693 doctor – patient relationship. In this regard, we argue that, by influencing peoples’ trust in  
694 doctors, the medical fake news spread during the pandemic, implicitly had a role in  
695 deteriorating the relation between doctors and their patients.

696           Therefore, the healthcare professionals were generally dissatisfied with the way medical  
697 and non – medical information was communicated during the pandemic, but younger  
698 professionals were satisfied than older professionals. Overall, the medical staff believed that  
699 fake news managed to undermine doctors’ credibility that social media platforms favor the  
700 spread of such news, and they had knowledge about the drugs which were known to have  
701 positive effects on the virus and about the alternative treatments.

702           Taking into account the results of the research, the paper has some theoretical and  
703 practical implications. From a theoretical point of view, the paper contributes to the literature  
704 on the matter of fake news and its influence on the trust of healthcare professionals, a strength  
705 of the paper being the fact that it analyzed the opinions of medical staff (doctors, nurses,  
706 medical students and students at university nursing program). From a practical point of view,  
707 the paper brings awareness to the phenomenon of fake news regarding medical treatments  
708 and the negative influence it has on doctors’ credibility. Another practical implication refers to  
709 the fact that the paper brings attention to the issue of using social media as a mean to  
710 communicate official information, many healthcare professionals, especially the younger ones,  
711 stating that such networks could be appropriate for sharing official information. Furthermore,  
712 by highlighting that the most affected aspect of the professional activity of doctors was the

713 relationship with their patients, the study also shows that actions need to be taken in order to  
714 restore people's trust in doctors and improve the process of communication between them.  
715 Hence, on the basis of the findings and implications of the study, we further discuss limitations  
716 and future research directions.

717

## 718 **Limitations and future research directions**

719 While our study proved relevant information regarding the perception of healthcare  
720 professionals about the way medical and non – medical information was communicated in time  
721 of the pandemic, it also has some limitations.

722 One limitation is represented by the fact that the perception of healthcare professionals  
723 was studied only by using quantitative methods. In this regard, a future research should focus  
724 on obtaining information from doctors while using qualitative methods too. Next, the study was  
725 conducted only on Romanian healthcare professionals, and thus, a future research should take  
726 into consideration a comparison between the opinions of professionals from different  
727 countries. Another limitation is represented by the fact that we only asked respondents to state  
728 the aspect which was most influenced by the pandemic, but we did not asked them to offer  
729 detail about other type of challenges encountered. Thus, a future research should focus on  
730 analyzing the extent to which aspects of the professional activity of doctors were affected, and  
731 on analyzing more deeply the challenges they had to face during the pandemic.

732 Furthermore, since our research revealed that many respondents believed that social  
733 media platforms could be appropriate for sharing official information, we draw attention to a  
734 problem that can arise in this context. Since people know that such platforms favor the spread

735 of fake news, if we encourage the use of social media in order to communicate official  
736 information, don't we risk to discredit that information as it is possible for people to consider  
737 that such information is fake too? We believe that this issue should be taken into account and  
738 studied in a future research.

## 739 **Author Contributions**

740 Conceptualization: Claudiu Coman, Maria Cristina Bularca

741 Data curation: Claudiu Coman, Liliana Rogoza, Angela Repanovici, Maria Cristina Bularca

742 Formal analysis: Maria Cristina Bularca, Claudiu Coman

743 Investigation: Claudiu Coman, Maria Cristina Bularca, Angela Repanovici, Liliana Rogoza

744 Methodology: Maria Cristina Bularca, Claudiu Coman

745 Project administration: Claudiu Coman, Liliana Rogoza, Angela Repanovici

746 Resources: Maria Cristina Bularca, Liliana Rogoza, Angela Repanovici

747 Supervision: Claudiu Coman, Liliana Rogoza, Angela Repanovici

748 Writing – original draft: Maria Cristina Bularca, Claudiu Coman

749 Writing – review & editing: Maria Cristina Bularca, Claudiu Coman, Liliana Rogoza, Angela  
750 Repanovici

751

752

753

## 754 **References**

- 755 **1.** Sanders JM, Monogue ML, Jodlowski TZ, Cutrell J. B.Pharmacologic Treatments for  
756 Coronavirus Disease 2019 (COVID-19): A Review. *JAMA*. 2020; 323(18):1824–1836.  
757 doi:10.1001/jama.2020.6019
- 758 **2.** Shereen MA, Khan S, Kazmi A, Bashir N, Siddique R. COVID-19 infection: Origin, transmission,  
759 and characteristics of human coronaviruses. *J Adv Res*. 2020; 24:91-98 doi:  
760 10.1016/j.jare.2020.03.005
- 761 **3.** Kristina SA, Herliana N, Hanifah S. The perception of role and responsibilities during covid-19  
762 pandemic: A survey from Indonesian pharmacists. *Int J Pharm Res*, 2020; 12(2). doi:  
763 10.31838/ijpr/2020.SP2.369
- 764 **4.** World Health Organization (WHO). Timeline of WHO's response to COVID-19. [Internet].  
765 World Health Organization. 2020 June 29 [cited 2020 Nov 27] Available from:  
766 <https://www.who.int/news/item/29-06-2020-covidtimeline>
- 767 **5.** European Centre for Disease Prevention and Control. COVID-19 situation update worldwide,  
768 as of 27 November 2020 [Internet]. European Centre for Disease Prevention and Control. 2020  
769 June 29 [cited 2021 Nov 25] Available from: [https://www.ecdc.europa.eu/en/geographical-](https://www.ecdc.europa.eu/en/geographical-distribution-2019-ncov-cases)  
770 [distribution-2019-ncov-cases](https://www.ecdc.europa.eu/en/geographical-distribution-2019-ncov-cases).
- 771 **6.** British Broadcasting Corporation. COVID vaccine: First 'milestone' vaccine offers 90%  
772 protection. [Internet]. 2020 Nov 9 [cited 2020 Nov 27] Available from:  
773 <https://www.bbc.com/news/health-54873105>.
- 774 **7.** Kommenda N, Jones FH. COVID vaccine tracker: when will a coronavirus vaccine be ready?  
775 [Internet]. The Guardian. 2020 Nov 10 [cited 2020 Nov 27] Available from:

776 <https://www.theguardian.com/world/ng-interactive/2020/nov/10/covid-vaccine-tracker-when->  
777 [will-a-coronavirus-vaccine-be-ready](https://www.theguardian.com/world/ng-interactive/2020/nov/10/covid-vaccine-tracker-when-will-a-coronavirus-vaccine-be-ready)

778 **8.** Ahsan W, Javed S, Al Bratty M, Alhazmi HA, Najmi A. Treatment of SARS-CoV-2: How far have  
779 we reached? *Drug Discov Ther.* 2020; 14(2):67-72. doi: 10.5582/ddt.2020.03008

780 **9.** Kupferschmidt K, Cohen J. Race to find COVID-19 treatments accelerates. *Science.* 2020;  
781 367(6485): 1412-1413. doi: 10.1126/science.367.6485.1412

782 **10.** World Health Organization (WHO). Solidarity clinical trial for COVID-19 treatments  
783 [Internet]. World Health Organization 2019. [cited 2020 Nov 27] Available from:  
784 [https://www.who.int/emergencies/diseases/novel-coronavirus-2019/global-research-on-novel-](https://www.who.int/emergencies/diseases/novel-coronavirus-2019/global-research-on-novel-coronavirus-2019-ncov/solidarity-clinical-trial-for-covid-19-treatments)  
785 [coronavirus-2019-ncov/solidarity-clinical-trial-for-covid-19-treatments](https://www.who.int/emergencies/diseases/novel-coronavirus-2019/global-research-on-novel-coronavirus-2019-ncov/solidarity-clinical-trial-for-covid-19-treatments)

786 **11.** Zarocostas J. How to fight an infodemic. *The Lancet.* 2020; 395(10225):676. doi:  
787 10.1016/S0140-6736(20)30461-X

788 **12.** Tuccori M, Convertino I, Ferraro S, Cappello E, Valdiserra G, Focosi D et al. The Impact of the  
789 COVID-19 “Infodemic” on Drug-Utilization Behaviors: Implications for Pharmacovigilance. *Drug*  
790 *Saf.* 2020;43:699–709 doi:10.1007/s40264-020-00965-w

791 **13.** Rosa SGV, Santos WC. Clinical trials on drug repositioning for COVID-19 treatment. *Rev*  
792 *Panam Salud Publica.* 2020; 44: e40 doi: 10.26633/RPSP.2020.40

793 **14.** Sahraei Z, Shabani M, Shokouhi S, Saffaei A. Aminoquinolines against coronavirus disease  
794 2019 (COVID-19): chloroquine or hydroxychloroquine. *Int J Antimicrob Agents.* 2020;  
795 105945(10.1016) doi:10.1016/j.ijantimicag.2020.105945



796 **15.** White NJ, Watson JA, Høglund RM, Chan XHS, Cheah PY, Tarning J. COVID-19 prevention  
797 and treatment: A critical analysis of chloroquine and hydroxychloroquine clinical pharmacology.  
798 PLoS Med. 2020; 17(9): e1003252. doi:10.1371/journal.pmed.1003252

799 **16.** Liu J, Cao R, Xu M, Wang X, Zhang H, Hu H. et al. Hydroxychloroquine, a less toxic derivative  
800 of chloroquine, is effective in inhibiting SARS-CoV-2 infection in vitro. *Cell Discov.* 2020; 6(16)  
801 doi:10.1038/s41421-020-0156-0 .

802 **17.** Wang M, Cao R, Zhang L, Yang X, Liu J, Xu M. et.al. Remdesivir and chloroquine effectively  
803 inhibit the recently emerged novel coronavirus (2019-nCoV) in vitro. *Cell Res.* 2020; 30:269–  
804 271. doi:10.1038/s41422-020-0282-0

805 **18.** Davidescu EI, Odajiu I, Bunea T, Sandu G, Stratan L, Aramă V. et.al. Treatment with  
806 hydroxychloroquine in patients with covid-19. Experience of a neurology  
807 department. *Farmacia.* 2020; 68(4): 597-605. doi:10.31925/farmacia.2020.4.3

808 **19.** Gautret P, Lagier JC, Parola P, Meddeb L, Mailhe M, Doudier B. et.al. Hydroxychloroquine  
809 and azithromycin as a treatment of COVID-19: results of an open-label non-randomized clinical  
810 trial. *Int. J. Antimicrob. Agents.* 2020; 105949. doi:10.1016/j.ijantimicag.2020.105949.

811 **20.** Thomson K, Nachlis H. Emergency Use Authorizations During the COVID-19  
812 Pandemic: Lessons From Hydroxychloroquine for Vaccine Authorization and  
813 Approval. *JAMA.* 2020; 324(13):1282–1283. doi:10.1001/jama.2020.16253.

814 **21.** U.S Food & Drug Administration. FDA cautions against use of hydroxychloroquine or  
815 chloroquine for COVID-19 outside of the hospital setting or a clinical trial due to risk of heart  
816 rhythm problems. [Internet]. Food and Drug Administration. 2020 Jul 1 [cited 2020 Nov 27]

817 Available from: <https://www.fda.gov/drugs/drug-safety-and-availability/fda-cautions-against->  
818 [use-hydroxychloroquine-or-chloroquine-covid-19-outside-hospital-setting-or](https://www.fda.gov/drugs/drug-safety-and-availability/fda-cautions-against-use-hydroxychloroquine-or-chloroquine-covid-19-outside-hospital-setting-or) .

819 **22.** Recovery. No clinical benefit from use of hydroxychloroquine in hospitalized patients with  
820 COVID-19. [Internet]. Recovery 2020 June 5 [cited 2020 Nov 27] Available from:  
821 <https://www.recoverytrial.net/news/statement-from-the-chief-investigators-of-the->  
822 [randomised-evaluation-of-covid-19-therapy-recovery-trial-on-hydroxychloroquine-5-june-2020-](https://www.recoverytrial.net/news/statement-from-the-chief-investigators-of-the-randomised-evaluation-of-covid-19-therapy-recovery-trial-on-hydroxychloroquine-5-june-2020-no-clinical-benefit-from-use-of-hydroxychloroquine-in-hospitalised-patients-with-covid-19)  
823 [no-clinical-benefit-from-use-of-hydroxychloroquine-in-hospitalised-patients-with-covid-19](https://www.recoverytrial.net/news/statement-from-the-chief-investigators-of-the-randomised-evaluation-of-covid-19-therapy-recovery-trial-on-hydroxychloroquine-5-june-2020-no-clinical-benefit-from-use-of-hydroxychloroquine-in-hospitalised-patients-with-covid-19) .

824 **23.** Naveed M, Uddin S, Abdullah KS, Ishaq SE, Ahmad T. Various Evidence-Based Hypothetical  
825 and Experimental Treatment Approaches and Their Effectiveness against COVID-19 Worldwide:  
826 A Comprehensive Literature Review. *EJMO* 2020; 4(4):265–285. doi:  
827 10.14744/ejmo.2020.52538

828 **24.** Chu C M, Cheng VCC, Hung IFN, Wong MML, Chan KH, Chan KS, et.al. Role of  
829 lopinavir/ritonavir in the treatment of SARS: initial virological and clinical findings. *Thorax*.  
830 2004; 59(3):252-256. doi:10.1136/thorax.2003.012658

831 **25.** Cao B, Wang Y, Wen D, Liu W, Wang J, Fan G, et al. A trial of lopinavir-ritonavir in adults  
832 hospitalized with severe covid-19. *N. Engl . J. Med.* 2020; 382(19): 1787-1799.  
833 doi:10.1056/NEJMoa2001282

834 **26.** Vosu J, Britton P, Howard-Jones A, Isaacs D, Kesson A, Khatami A, et al. Is the risk of  
835 ibuprofen or other non-steroidal anti-inflammatory drugs increased in COVID-19?. *J Paediatr*  
836 *Child Health.* 2020; 56(10): 1645-1646. doi:10.1111/jpc.15159

837 **27.** Fang L, Karakiulakis G, Roth M. Are patients with hypertension and diabetes mellitus at  
838 increased risk for COVID-19 infection? *Lancet Respir Med.* 2020; 8(4):e21.8 doi:10.1016/S2213-  
839 2600(20)30116-8

840 **28.** Science alert. Updated: WHO Now Doesn't Recommend Avoiding Ibuprofen For COVID-19  
841 Symptoms [Internet]. Science alert 2020 Mar 17 [cited 2020 Nov 27]. Available from:  
842 [https://www.sciencealert.com/who-recommends-to-avoid-taking-ibuprofen-for-covid-19-](https://www.sciencealert.com/who-recommends-to-avoid-taking-ibuprofen-for-covid-19-symptoms)  
843 [symptoms](https://www.sciencealert.com/who-recommends-to-avoid-taking-ibuprofen-for-covid-19-symptoms)

844 **29.** Esba LCA, Alqahtani RA, Thomas A, Shamas N, Alswaidan L, Mardawi G. Ibuprofen and  
845 NSAID Use in COVID-19 Infected Patients Is Not Associated with Worse Outcomes: A  
846 Prospective Cohort Study. *Infect Dis Ther.* 2020; 1-16. doi:10.1007/s40121-020-00363-w

847 **30.** Rinott E, Kozer E, Shapira Y, Bar-Haim A, Youngster I. Ibuprofen use and clinical outcomes in  
848 COVID-19 patients. *Clin Microbiol Infect.* 2020; 26(9):1259.e5-1259.e7.  
849 doi:10.1016/j.cmi.2020.06.003

850 **31.** Roberts M. Coronavirus: Dexamethasone proves first life-saving drug. [Internet]. British  
851 Broadcasting Corporation 2020 June 16 [cited 2020 Nov 27] Available from:  
852 <https://www.bbc.com/news/health-53061281>.

853 **32.** Horby P, Lim WS, Emberson JR, Mafham M, Bell JL, Linsell L, et al.. Dexamethasone in  
854 hospitalized patients with Covid-19-preliminary report. *N. Engl. J. Med.* 2020.  
855 doi:10.1056/nejmoa2021436

856 **33.** Lu CC, Chen MY, Lee WS, Chang YL. Potential therapeutic agents against COVID-19: What we  
857 know so far. *J Chin Med Assoc.* 2020; 83(6):534-536. doi: 10.1097/JCMA.0000000000000318

858 **34.** Wang Y, Zhang D, Du G, Du R, Zhao J, Jin Y, et al. Remdesivir in adults with severe COVID-19:  
859 a randomised, double-blind, placebo-controlled, multicentre trial. *The Lancet*. 2020;  
860 395(10236):1569-1578. doi:10.1016/S0140-6736(20)31022-9

861 **35.** Beigel JH, Tomashek KM, Dodd LE, Mehta AK, Zingman BS, Kalil AC. et al. Remdesivir for the  
862 treatment of Covid-19. *N. Engl. J. Med.* 2020.  
863 <https://www.nejm.org/doi/10.1056/NEJMoa2007764>

864 **36.** U.S Food and Drug Administration. FDA Approves First Treatment for COVID-19 [Internet].  
865 Food and Drug Administration 2020 Oct 22 [cited 2020 Nov 27] Available from:  
866 [https://www.fda.gov/news-events/press-announcements/fda-approves-first-treatment-covid-](https://www.fda.gov/news-events/press-announcements/fda-approves-first-treatment-covid-19)  
867 [19](https://www.fda.gov/news-events/press-announcements/fda-approves-first-treatment-covid-19).

868 **37.** U.S Food and Drug Administration. Coronavirus (COVID-19) Update: November 20, 2020  
869 [Internet]. Food and Drug Administration 2020 Nov 20 [cited 2020 Nov 27] Available from:  
870 [https://www.fda.gov/news-events/press-announcements/coronavirus-covid-19-update-](https://www.fda.gov/news-events/press-announcements/coronavirus-covid-19-update-november-20-2020)  
871 [november-20-2020](https://www.fda.gov/news-events/press-announcements/coronavirus-covid-19-update-november-20-2020).

872 **38.** Glasdam S, Stjernswärd S. Information about the COVID-19 pandemic—a thematic analysis of  
873 different ways of perceiving true and untrue information. *SSHOP*. 2020; (2)1: 100090.  
874 <https://doi.org/10.1016/j.ssaho.2020.100090>

875 **39.** Caleb TC, Hayes RA. Social Media: Defining, Developing, and Divining. *Atl J Commun*.2015;  
876 23:1: 46-65. <https://doi.org/10.1080/15456870.2015.972282>

877 **40.** Boyd DM, Ellison NB.Social network sites: Definition, history, and scholarship. *J Comput*  
878 *Mediat Commun*. 2007; 13(1): 210-230. <https://doi.org/10.1111/j.1083-6101.2007.00393.x>

- 879 **41.** Reuter C, Stieglitz S, Imran M. Social media in conflicts and crises *Behav. Inf. Technol.*  
880 2020; 39(3): 241-251. <https://doi.org/10.1080/0144929X.2019.1629025>
- 881 **42.** Vasconcellos-Silva PR, Castiel LD. COVID-19, fake news, and the sleep of communicative  
882 reason producing monsters: the narrative of risks and the risks of narratives. *Cad Saude Publica.*  
883 2020); 36(7): e00101920. <https://doi.org/10.1590/0102-311x00101920>
- 884 **43.** Pulido CM, Ruiz-Eugeni L, Redondo-Sama G, Villarejo-Carballido B. A New Application of  
885 Social Impact in Social Media for Overcoming Fake News in Health. *Int. J. Environ. Res. Public*  
886 *Health.* 2020; 17(7):2430. <https://doi.org/10.3390/ijerph17072430>
- 887 **44.** Al-Dmour H, Salman A, Abuhashesh M, Al-Dmour R. Influence of social media platforms on  
888 public health protection against the COVID-19 pandemic via the mediating effects of public  
889 health awareness and behavioral changes: integrated model. *J. Medical Internet Res.*  
890 2020; 22(8):e19996.
- 891 **45.** Wong JEL, Leo YS, Tan CC. COVID-19 in Singapore—Current Experience: Critical Global Issues  
892 That Require Attention and Action. *JAMA.* 2020; 323(13):1243–  
893 1244. doi:10.1001/jama.2020.2467
- 894 **46.** Lazer DM, Baum MA, Benkler Y, Berinsky AJ, Greenhill KM, Menczer F, et al. The science of  
895 fake news. *Science.* 2018; 359(6380):1094-1096. DOI: 10.1126/science.aao2998
- 896 **47.** Moscadelli A, Albora G, Biamonte MA, Giorgetti D, Innocenzio M, Paoli S, et al. Fake News  
897 and Covid-19 in Italy: Results of a Quantitative Observational Study. *Int. J. Environ. Res. Public*  
898 *Health.* 2020; 17:5850
- 899 **48.** Mian A, Khan S. Coronavirus: The spread of misinformation. *BMC Medicine.* 2020; 18(1):1-2  
900 doi:10.1186/s12916-020-01556-3 \

901 **49.** Pan American Health Organization. Understanding the infodemic and misinformation in the  
902 fight against covid-19. [Internet]. Pan American Health Organization 2020 May 1 [cited 2020  
903 Nov 27] Available from: [https://www.paho.org/en/documents/understanding-infodemic-and-](https://www.paho.org/en/documents/understanding-infodemic-and-misinformation-fight-against-covid-19)  
904 [misinformation-fight-against-covid-19](https://www.paho.org/en/documents/understanding-infodemic-and-misinformation-fight-against-covid-19).

905 **50.** Bowles J, Larreguy H, Liu, S. Countering misinformation via WhatsApp: Preliminary evidence  
906 from the COVID-19 pandemic in Zimbabwe. *PloS one*. 2020; 15(10): e0240005.  
907 <https://doi.org/10.1371/journal.pone.0240005>

908 **51.** Ittefaq M, Hussain SA, Fatima M. COVID-19 and social-politics of medical misinformation on  
909 social media in Pakistan. *Media Asia*. 2020; 47(1-2): 75-80.  
910 <https://doi.org/10.1080/01296612.2020.1817264>

911 **52.** The National Law Review. There's a Fake News Pandemic. Could COVID-19 and Trademarks  
912 be the Cure? [Internet]. The National Law Review 2020 Jul 7 [cited 2020 Nov 27] Available from:  
913 [https://www.natlawreview.com/article/there-s-fake-news-pandemic-could-covid-19-and-](https://www.natlawreview.com/article/there-s-fake-news-pandemic-could-covid-19-and-trademarks-be-cure)  
914 [trademarks-be-cure](https://www.natlawreview.com/article/there-s-fake-news-pandemic-could-covid-19-and-trademarks-be-cure)

915 **53.** O'connor C, Murphy M. Going Viral: Doctors Must Combat Fake News in the Fight against  
916 Covid-19. *Ir Med J*. 2020; 113(5): 85-85.

917 **54.** Pew Research Center. Nearly three-in-ten Americans believe COVID-19 was made in a lab.  
918 [Internet]. Pew research center 2020 April 8 [cited 2020 Nov 27] Available from:  
919 [https://www.pewresearch.org/fact-tank/2020/04/08/nearly-three-in-ten-americans-believe-](https://www.pewresearch.org/fact-tank/2020/04/08/nearly-three-in-ten-americans-believe-covid-19-was-made-in-a-lab/)  
920 [covid-19-was-made-in-a-lab/](https://www.pewresearch.org/fact-tank/2020/04/08/nearly-three-in-ten-americans-believe-covid-19-was-made-in-a-lab/)

921 **55.** Health Analytics Asia. 50 Fake ‘frequently forwarded’ COVID-19 WhatsApp messages.  
922 [Internet]. Health Analytics Asia 2020 April 2 [cited 2020 Nov 27] Available from:  
923 <https://www.ha-asia.com/50-fake-frequently-forwarded-covid-19-whatsapp-messages/>

924 **56.** Brennen JS, Simon F, Howard PN, Nielsen RK. Types, sources, and claims of COVID-19  
925 misinformation. *Reuters Institute*. 2020; 7: 1-13.

926 **57.** Pennycook G, McPhetres J, Zhang Y, Lu JG, Rand DG. Fighting COVID-19 misinformation on  
927 social media: Experimental evidence for a scalable accuracy-nudge intervention. *Psychol*.  
928 2020; 31(7): 770-780. <https://doi.org/10.1177/0956797620939054>

929 **58.** Barua Z, Barua S, Aktar S, Kabir N, Li M. Effects of misinformation on COVID-19 individual  
930 responses and recommendations for resilience of disastrous consequences of  
931 misinformation. *Prog Disaster Science*. 2020; 8: 100119. doi:10.1016/j.pdisas.2020.100119

932 **59.** Ahmed N, Shahbaz T, Shamim A, Khan KS, Hussain SM, Usman A. The COVID-19 Infodemic:  
933 A Quantitative Analysis Through Facebook. *Cureus*. 2020; 12(11): e11346. doi:  
934 10.7759/cureus.11346

935 **60.** Nagler RH, Vogel RI, Gollust SE, Rothman AJ, Fowler EF, Yzer MC. Public perceptions of  
936 conflicting information surrounding COVID-19: Results from a nationally representative survey  
937 of US adults. *PloS one*. 2020; 15(10): e0240776. doi:10.1371/journal.pone.0240776

938 **61.** Orso D, Federici N, Copetti R, Vetrugno L, Bove T. Infodemic and the spread of fake news in  
939 the COVID-19-era. *Eur J Emerg Med*. 2020; 27(5):327-328. doi:10.1097/MEJ.0000000000000713

940 **62.** McNab C. What social media offers to health professionals and citizens. *Bull World Health*  
941 *Organ*. 2009; 87(8):566. doi:10.2471/blt.09.066712

- 942 **63.** Ma X, Vervoort D, Luc JG. When misinformation goes viral: access to evidence-based  
943 information in the COVID-19 pandemic. *J. Glob. Health. Sci.* 2020; 2(1):e13  
944 doi:10.35500/jghs.2020.2.e13
- 945 **64.** Tasnim S, Hossain MM, Mazumder H. Impact of rumors and misinformation on COVID-19 in  
946 social media. *J Prev Med Public Health.* 2020; 53(3):171-174.
- 947 **65.** Bode L, Vraga EK. See something, say something: Correction of global health misinformation  
948 on social media. *J Health Commu.* 2018; 33(9):1131-1140.  
949 doi:10.1080/10410236.2017.1331312
- 950 **66.** Chou WYS, Oh A, Klein WM. Addressing health-related misinformation on social  
951 media. *Jama.* 2018; 320(23): 2417-2418. doi:10.1001/jama.2018.16865.
- 952 **67.** Stasiuk K, Polak M, Dolinski D, Maciuszek J. The credibility of health information sources as  
953 predictors of attitudes toward vaccination—the results from a longitudinal study in  
954 Poland. *Vaccines.* 2021; 9(8):933 doi: 10.3390/vaccines9080933
- 955 **68.** Cernicova-Buca M, Palea A. An appraisal of communication practices demonstrated by  
956 romanian district public health authorities at the outbreak of the COVID-19  
957 pandemic. *Sustainability.* 2021; 13(5): 1-19, doi: 10.3390/su13052500
- 958 **69.** Tagliacozzo S, Albrecht F, Ganapati NE. International Perspectives on COVID-19  
959 Communication Ecologies: Public Health Agencies' Online Communication in Italy, Sweden, and  
960 the United States. *Am Behav Sci.* 2021; 65(7), 934-955 doi: 10.1177/0002764221992832
- 961 **70.** Saechang O, Yu J, Li Y. Public trust and policy compliance during the COVID-19 pandemic:  
962 The role of professional trust. *Healthcare.* 2021; 9 (2):1-13 doi: 10.3390/healthcare9020151.



963 **71.** Lewandowski R, Goncharuk AG, Cirella GT. Restoring patient trust in healthcare: medical  
964 information impact case study in Poland. *BMC Health Serv. Res.* 2021; 21(1):1-11 doi:  
965 10.1186/s12913-021-06879-2

966 **72.** Soveri A, Karlsson LC, Antfolk J, Lindfelt M, Lewandowsky S. Unwillingness to engage in  
967 behaviors that protect against COVID-19: the role of conspiracy beliefs, trust, and endorsement  
968 of complementary and alternative medicine. *BMC Public Health.* 2021; 21(1): 1-12 doi:  
969 10.1186/s12889-021-10643-w

970 **73.** Antinyan A, Bassetti T, Corazzini L, Pavesi F. Trust in the health system and COVID-19  
971 treatment. *Front. Psychol.* 2021; 12:1-14 doi:10.3389/fpsyg.2021.643758

972 **74.** Law RW, Kanagasingam S, Choong KA. Sensationalist social media usage by doctors and  
973 dentists during Covid-19. *Digit. Health.* 2021; 7:1-12 doi: 10.1177/20552076211028034

974 **75.** Leonard MB, Pursley DM, Robinson LA, Abman SH, Davis JM. The importance of  
975 trustworthiness: lessons from the COVID-19 pandemic. *Pediatr. Res.* 2021; 1-4  
976 doi:10.1038/s41390-021-01866-z

977 **76.** Wood JL, Lee GY, Stinnett SS, Southwell BG. A Pilot Study of Medical Misinformation  
978 Perceptions and Training Among Practitioners in North Carolina (USA). *INQUIRY: The Journal of*  
979 *Health Care Organization, Provision, and Financing,* 2021; 58:1-6 doi:  
980 10.1177/00469580211035742

981 **77.** Gopichandran V, Sakthivel K. Doctor-patient communication and trust in doctors during  
982 COVID 19 times—A cross sectional study in Chennai, India. *Plos One.* 2021: 16(6), 1-11 doi:  
983 10.1371/journal.pone.0253497

- 984 **78.** Nwoga HO, Ajuba, MO, Ezeoke UE. Effect of COVID-19 on doctor-patient relationship. *Int J*  
985 *Community Med Public Health.* 2020; 7(12): 2394-6040, doi: 10.18203/2394-  
986 6040.ijcmph20205136
- 987 **79.** Rocha YM, de Moura GA, Desidério GA, de Oliveira CH, Lourenço FD, de Figueiredo NLD. The  
988 impact of fake news on social media and its influence on health during the COVID-19 pandemic:  
989 A systematic review. *J. Public Health.* 2021; 1-10 doi:10.1007/s10389-021-01658-z
- 990 **80.** Greene CM, Murphy G. Quantifying the effects of fake news on behavior: Evidence from a  
991 study of COVID-19 misinformation. *J Exp Psychol Appl.* 2021 Dec;27(4):773-784. doi:  
992 10.1037/xap0000371.
- 993 **81.** Rogozea LM, Sechel G, Bularca MC, Coman C, Cocuz ME. Who's Getting Shots First? Dealing  
994 With the Ethical Responsibility for Prioritizing Population Groups in Vaccination. *Am J Ther.*  
995 2021 Jun 22;28(4):e478-e487. doi: 10.1097/MJT.0000000000001400. PMID: 34228653.
- 996 **82.** Rogozea L, Purcaru D, Leașu F, Nemet C. Biomedical research - opportunities and ethical  
997 challenges. *Rom J Morphol Embryol.* 2014;55(2 Suppl):719-22. PMID: 25178352.
- 998 **83.** Olimid AP, Rogozea LM, Olimid DA. Ethical approach to the genetic, biometric and health  
999 data protection and processing in the new EU General Data Protection Regulation (2018). *Rom J*  
1000 *Morphol Embryol.* 2018;59(2):631-636. PMID: 30173275.

## 1001 **Supporting information**

- 1002 S1 Appendix English version of the questionnaire  
1003 (docx)
- 1004 S2 Appendix Romanian version of the questionnaire  
1005 (docx)

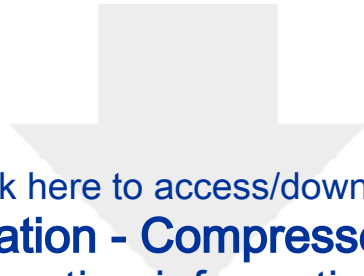

[Click here to access/download](#)

**Supporting Information - Compressed/ZIP File Archive**  
Supporting information.zip

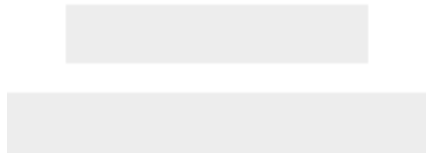

1 Challenges in the communication process during the COVID-19 pandemic- a perspective of  
2 medical staff

3

4 Claudiu Coman<sup>1#a\*</sup>, Maria Cristina Bularca<sup>1</sup>, Angela Repanovici<sup>2</sup>, Liliana Rogozea<sup>3</sup>

5 1 Department of Social Sciences and Communication, Faculty of Sociology and Communication,  
6 Transilvania University of Brasov, Brasov, Romania;

7 2 Department of Product Design, Mechatronics and Environment, Faculty of Product Design and  
8 Environment, Transilvania University of Brasov, Brasov, Romania

9 3 Basic, Preventive and Clinical Sciences Department, Transilvania University of Brasov, Brasov,  
10 Romania;

11

12 #a Current address: Department of Social Sciences and Communication, Faculty of Sociology and  
13 Communication, Transilvania University of Braşov, Brasov, România

14

15 \* Corresponding author

16 E-mail: [claudiu.coman@unitbv.ro](mailto:claudiu.coman@unitbv.ro) (CC)

17

18

19

20

21

22

23

## 24 **Abstract**

25 Background. Healthcare professionals had to face numerous challenges during the pandemic,  
26 their professional activity being influenced not only by the virus, but also by the spread of  
27 medical misinformation. In this regard, we aimed to analyze, from the perspective of medical  
28 staff, the way medical and non - medical information about the virus was communicated during  
29 the pandemic in order to raise awareness about the way misinformation affected the medical  
30 staff.

31 Methods and findings. The study was conducted on Romanian healthcare professionals  
32 including doctors, nurses and medical students. They were asked to answer to a questionnaire  
33 and the sample of the research includes 536 respondents. The findings revealed that most  
34 respondents stated that information about alternative treatments against the virus affected the  
35 credibility of health professionals, and that younger professionals believed to a greater extent  
36 that trust in doctors was affected. The research also showed that respondents were well  
37 informed about the drugs used in clinical trials in order to treat the virus, and that younger  
38 respondents believed that social media should be used to send official information. Among the  
39 main limitations of our study we mention the fact that we used only quantitative methods and  
40 the fact we focused only on Romanian healthcare professionals.

41 Conclusions. Healthcare professionals declared that the spread of misinformation regarding  
42 alternative treatments, affected their credibility and the relationship with their patients.  
43 Healthcare professionals had knowledge about the drugs used in clinical trials, and they  
44 acknowledged the role of social media in spreading medical misinformation. However, younger  
45 professionals also believed that social media could be used to share official information about

46 the virus. A future research should focus on studying the opinion of Romanian and international  
47 doctors, it should use qualitative methods too and should address the issue of social media  
48 being an appropriate environment for sending official information.

## 49 **Introduction**

50 The COVID 19 pandemic generated multiple changes in the way today's society  
51 members carry out their daily activities. While many domains were affected by the spread of  
52 the virus, such as the educational system or the cultural sector, the health sector was the one  
53 that faced the most challenges, the pandemic managing to generate a tremendous global public  
54 health crisis [1].

55 Caused by severe acute respiratory syndrome coronavirus 2 (SARS-CoV-2) [2], the  
56 disease was firstly detected in December 2019, in Wuhan, China [3], and it fastly spread all over  
57 the world. The World Health Organization was informed about a pneumonia outbreak in  
58 Wuhan on December 31 2019, the number of cases continued to increase, and on March 11  
59 2020 the World Health Organization characterized COVID 19 as a pandemic [4]. Being highly  
60 contagious, the virus affected a large number of people, and as of November 27 over 61 million  
61 cases were reported [5]. Even though many companies and institutions are struggling to  
62 develop a vaccine, Pfizer, Gamaleya Research Institute, University of Oxford, and a preliminary  
63 analysis of the vaccine proposed by Pfizer showed that the vaccine is able to prevent more than  
64 90% of people from getting infected with COVID 19 [6], so far no vaccine was approved as a  
65 general and universal vaccine against COVID 19 [7].

66 Ever since the pandemic was declared, finding the right treatment for the virus has  
67 become a priority for researchers and doctors from all over the world. In this regard, large

68 number of trials started to be conducted, and in order to find an efficient drug treatment  
69 against the virus, one method that was adopted was testing and administrating to patients,  
70 drugs that were previously used for curing other viruses [8]. Thus, on March 20 2020, The  
71 World Health Organization launched the SOLIDARITY clinical trial, a trial that monitored the  
72 effects on patients infected with COVID 19, of specific drugs that proven to be effective in the  
73 treatment of other diseases: remdesivir, interferon beta, chloroquine and hydroxychloroquine -  
74 previously used for Malaria, as well as drugs used on HIV patients: lopinavir and ritonavir [9].  
75 However, according to the interim results published on October 15 2020 by WHO, even though  
76 those drugs were taught to have positive effects on treating COVID 19, they had little influence  
77 or no influence at all on mortality in general, on the need and initiation of ventilation and on  
78 the recovery process [10].

79         With the development of many trials and programs meant to find a cure for COVID 19  
80 and with the use of diverse drug combinations, another major problem arose: misinformation  
81 and fake news about the virus, its treatment or methods to combat it. In this regard, along with  
82 the pandemic, people also had to face an epidemic of information, described by the general  
83 director of WHO as an „infodemic” [11]. In other words, information about COVID 19 began to  
84 be spread by people on every available communication channel, both in the online and offline  
85 environment. However, very often and especially on social media, the information was poorly  
86 communicated, it was distorted and there usually wasn't enough scientific evidence to  
87 demonstrate its validity [12].

88         Taking into account the previously mentioned aspects the paper addresses the issues of  
89 drugs tested and used for the treatment of COVID 19 and how information about COVID 19 was

90 communicated in the offline and online environment. The purpose of the paper is to analyze,  
91 from the perspective of medical staff, the way medical and non - medical information about the  
92 virus was communicated during the pandemic in order to raise awareness about the way  
93 misinformation affected medical staff. Thus, the paper aims at finding an answer to three  
94 research questions: (1) to what extent information about alternative treatments affected the  
95 credibility of medical staff? (2) What is the knowledge of medical staff about the type of drugs  
96 that had positive effects on treating the disease and about alternative treatments? (3) How  
97 satisfied is the medical staff with the way medical and non-medical information was  
98 communicated online and offline during the pandemic? (4) What is the perception of medical  
99 staff about the role of social media in spreading misinformation about the virus? (5) What  
100 aspects of the professional activity of the medical staff were affected most by the COVID – 19  
101 pandemic?

102 Hence, considering the purpose of our paper and the research questions, we believed it  
103 was necessary to analyze the literature on the drugs used to treat COVID – 19, on the role of  
104 social media platforms in spreading fake information about the virus and potential treatments,  
105 and on the way the pandemic influenced the credibility of doctors and their relationship with  
106 their patients.

## 107 **Literature review**

### 108 **Information on drugs used to treat COVID 19**

109 Before analyzing the way information about the virus was communicated in the online  
110 environment, it is important to take a look at the drugs used to treat the disease. Hence, one of  
111 the most important issues that appeared with the COVID 19 pandemic, was finding the right



112 treatment for the virus. In this regard, researchers started to develop many experimental trials  
113 and used diversified drug combinations in order to treat patients with COVID 19. However,  
114 information that was communicated about the effectiveness of certain drugs was often  
115 contradictory.

116 Chloroquine and hydroxychloroquine are two drugs that were tested and included in  
117 many trials. Both drugs were previously used to treat malaria but they also have antiviral  
118 effects on viruses like HIV since they have the ability to prevent the virus to enter in the host  
119 cells [13]. Even though they have similar compounds, chloroquine is taught to have more  
120 negative effects than hydroxychloroquine [14], and hydroxychloroquine is considered safer due  
121 to the fact that it can be tolerated better for a longer period of time [15].

122 While some studies show positive effects of hydroxychloroquine in inhibiting the  
123 infection with the virus in vitro [16, 17], other studies found no influence of the drug on  
124 mortality rate or time spent by patients in the hospital [18]. However, when  
125 hydroxychloroquine was combined with other drugs such as azithromycin, it showed beneficial  
126 effects in treating patients with COVID 19 [19].

127 Nonetheless the findings regarded the effectiveness of these drugs were contrasting.  
128 For example, on March 28 2020 the Food and Drug Administration (FDA) issued an Emergency  
129 Use Authorization for using hydroxychloroquine in treating people suffering from COVID 19  
130 [20], and in June 15 2020, the FDA retracted the authorization stating that the trials in which  
131 the drug was involved showed that the drug had no effect on the faster recovery of patients or  
132 on decreasing chances of death [21]. Even more, on 5th June 2020 the UK trial, Randomised  
133 Evaluation of COVID 19 THERAPY (RECOVERY), also stopped testing the drug on patients

134 because the results showed no benefits in improving the conditions of hospitalized patients  
135 with COVID 19 [22].

136 Studies were carried out with other drugs such as lopinavir/ritonavir, an antiviral drug  
137 used in the treatment of HIV [23]. While in concentration of 4 µg/ml and 50 µg/ml, the drug  
138 showed positive effects against the virus in vitro [24], a study on 199 patients, from which 99  
139 received the drug and the other 100 did not receive the drug, revealed that lopinavir/ritonavir  
140 had no benefits when it comes to diminishing mortality or improving the state of patients with  
141 severe symptoms [25].

142 Controversial discussions also involved the use of Ibuprofen, a Non-steroidal anti-inflammatory  
143 drug that is used to treat fever, or inflammation [26]. Since the pandemic was declared there  
144 has been a preoccupation regarding ibuprofen and its role in making people more vulnerable to  
145 contacting the virus. Thus, right after the declaration of the pandemic, in a letter addressed to  
146 The Lancet Journal, researchers pointed out that ibuprofen could make people with diabetes,  
147 cardiac disease or hypertension more likely to get infected with virus and have severe  
148 symptoms [27]. However, while firstly, WHO recommended people who are infected with the  
149 virus not to take ibuprofen, only one day after that recommendation, on 18 March 2020, WHO  
150 corrected its statement and mentioned that it "does not recommend against ibuprofen" [28].  
151 Even more, a study focusing on the use of ibuprofen showed that the drug does not make  
152 patients feel worse [29] and another study that analyzed the use of ibuprofen and paracetamol  
153 of 403 COVID 19 confirmed patients revealed that compared to paracetamol, ibuprofen did not  
154 aggravated the clinical state of the patients [30].

155 While other drugs failed to show beneficial effects on the treatment of COVID 19, drugs  
156 like dexamethasone, which is included in the UK RECOVERY trial, revealed positive effects on  
157 people suffering from COVID 19: the drug lowered the risk of death in patients on ventilators  
158 from 40% to 28% and in patients who were in need of oxygen, from 25% to 20%, but did not  
159 influence the state of patients who did not need oxygen [31, 32].

160 Another highly tested drug was Remdesivir, an antiviral drug produced by Gilead  
161 Sciences that was previously used in treating Ebola [33]. The information regarding its positive  
162 effects on treating COVID 19 is also contradictory. A study conducted from February 6 2020  
163 until March 12 2020, on 237 patients, showed that the drug did not bring any benefits for  
164 people that had severe symptoms of COVID 19 [34], while a more recent study revealed that  
165 Remdesivir had a more positive effect in reducing the time of recovery in patients with COVID  
166 19 that showed signs of respiratory issues, than it had the placebo effect [35]. However, the  
167 FDA approved on October 22 2020, the use of Remdesivir in the case of adults and also children  
168 aged 12 or older who have at least 44 kilograms, who are infected with the virus and need to be  
169 treated in the hospital [36], and as of November 20 2020, FDA allows, in emergency cases, the  
170 use of Remdesivir in combination with Baricitinib, for adults and children aged two or older that  
171 require oxygen and treatment in the hospital [37].

## 172 **Social media and COVID 19 misinformation**

173 Together with the health crisis, the COVID 19 pandemic generated an information crisis,  
174 often described as an infodemic, that is represented by the spread of fake news, misguided and  
175 false information, especially in the online environment [38].

176           In this context, social media plays an essential role in disseminating information. Social  
177 media consists of internet based channels that provide people with the opportunity to interact,  
178 communicate in asynchronous way and in real time, with either small or large audiences where  
179 value is derived from user generated content [39]. Social media comprises multiple social  
180 networks, which according to Boyd and Ellison, offer users the possibility to create profiles that  
181 are public, or semi-public, to create a list of people with whom they can interact and share  
182 information and to view the list of connections that other users make [40].

183           Social media channels are often used in time of crisis not only by citizen, but also by  
184 official authorities, emergency services, because they can facilitate communication and the  
185 spread of valuable information that can contribute to surpassing the crisis [41]. Social networks  
186 like Facebook, Whatsapp, Twitter, Instagram can function as sources that have the ability to  
187 confirm or complete the information communicated by the authorities, while also receiving  
188 feedback from the public [42]. Thus, sending messages through social media channels is a  
189 strategy that can help authorities obtain feedback on certain proposals regarding public health  
190 policies [43]. Even more, a study regarding the influence of social media on the way people  
191 protect their health during the pandemic, showed that social media can have positive impact on  
192 increasing awareness about public health and protection against the virus [44].

193           However, during the pandemic, while authorities can use social media to keep the  
194 public informed, a major issue generated by social media, that public health representatives  
195 have to face, is the spread of fake news [45].

196           Fake news are represented by fabricated information designed in the form of news  
197 communicated by the media that do not share the same process of organization and do not

198 have the same intent, and fake news are related to misinformation: information that is false or  
199 misleading, and disinformation: a type of false information whose aim is to deceive people [46].

200 Thus, the internet became a favorable environment for spreading conspiracy theories or  
201 false information about alternative treatment for the virus. Since people were stressed and  
202 frightened by the uncertainty of the situation, they started to consider reasonable and valid any  
203 information that presented explanations in regards to the virus [47]. Thus, when referring to  
204 health information, false news often undermine the credibility of official sources, they create  
205 confusion among people and favor the faster spread of the virus [48].

206 Misinformation during the pandemic can negatively influence peoples' health because  
207 false information is not easy to recognize, because it can determine people to change their  
208 behavior in a way that is harmful to their health and those around them. Thus, since the  
209 pandemic was declared, false information has been spread about the origin of the virus, about  
210 what caused it, how it spreads and what treatment is efficient for eliminating it [49]. However,  
211 a study focusing on the WhatsApp platform showed that when the information on social media  
212 is shared by trusted sources, it can increase knowledge about the virus and encourage people  
213 to adopt preventive behavior [50].

214 During the time of crisis, on platforms like WhatsApp or Facebook, more and more false  
215 news and unverified information about the virus began to be shared. With millions of users  
216 worldwide, WhatsApp became one of the platforms where most fake news were shared by  
217 forwarding messages to many users [51], while Facebook was characterized as the core,  
218 epicenter of misinformation [52].

219           When it comes to health misinformation on social media, the most discussed subjects  
220 are alternative cures involving certain food or drinks, hygiene related actions and treatment  
221 drugs. Thus, among the most “recommended” practices for preventing or curing COVID were  
222 drinking hot water every 15 minutes in order for the virus to go into the stomach, eating garlic,  
223 taking vitamin C or even pointing a hairdryer to the nostrils because the heat could eliminate  
224 the virus [53].

225 False news that circulated on social media regarding the virus also involve the idea that the  
226 virus was created on purpose in a lab, three in ten Americans considering true this information  
227 [54].

228           However, many other unverified methods were shared and the most forwarded  
229 messages on WhatsApp presented information about the fact that if people hold their breath  
230 for ten seconds without coughing then they are not infected with the virus, about the idea that  
231 at temperatures of 30-35 Celsius degrees the virus will die, messages about the release of the  
232 vaccine or about drugs allegedly recommended by Chinese doctors that could be efficient in  
233 eliminating the virus [55].

234           Nonetheless, misinformation became a major issue in the context of the pandemic, but  
235 also a subject of interest for researchers. A study focusing on the spread of fake news showed  
236 that most news reconfigure and twist the original information thus creating a different context,  
237 and that most of them contain false information about public authorities and health  
238 organizations [56].

239 Another study found that people who tend to rely on their intuition or who possess little  
240 scientific knowledge about certain subjects, encountered difficulties in differentiating true and

241 false information [57]. Thus, misleading or unverified information can negatively influence the  
242 way people behave. For example, people in USA who died after they consumed chloroquine  
243 may have used the drug because news about it mentioned that it could treat and eliminate the  
244 virus [58]. Even more, a study concerning misinformation on Facebook revealed that posts  
245 made from verified accounts contained more false information than the accounts that were not  
246 verified [59], while other study conducted from 23 April 2020 to 27 April 2020, focused on  
247 perception about contradictory information and stated that 73% of participants mentioned  
248 they observed or were exposed to contrasting messages usually communicated by politicians or  
249 health experts [60].

250         Apart from influencing peoples' beliefs or health practices, COVID 19 fake news also  
251 influenced the activity of health professionals. Social media managed to increase the level of  
252 trust in information that comes from people's personal opinions rather than professionals [61],  
253 and doctor's credibility is often affected. In order to improve these situations, doctors must be  
254 willing to use social media not just to send messages, but to actively communicate with people,  
255 to offer feedback, to share their experiences and rectify and clarify the fake news presented on  
256 social media [62].

257         Among action from health professionals, in order to combat COVID 19 fake news, social  
258 media networks as well as public authorities must implement some strategies. For example, the  
259 government of United Kingdom developed collaboration programs between its rapid response  
260 teams and social media platforms, and Taiwan introduced greater fines for news that were  
261 proven to be false [63]. Moreover, even though some social networks such as Facebook or  
262 Twitter already implemented algorithms to identity and remove fake accounts [64], or to

263 correct information [65], they should further develop efficient strategies in order to validate the  
264 information that people share [66].

265  
266

## 267 **The influence of the pandemic on doctors' credibility and relationship** 268 **with patients**

269 The way information regarding the virus was communicated online and offline during the  
270 pandemic played an essential role in the process of maintaining trust in health professionals. In  
271 this regard, a previous longitudinal study conducted in Poland revealed that trust in physicians  
272 has declined from 2018 – 2020, and emphasized the idea that the decrease may be caused by  
273 the health problems that people had to cope with during the pandemic and the problems with  
274 the healthcare system of the country [67]. In Romanian context, a previous study showed that  
275 the communication process of the healthcare system was poor and confusing, and that public  
276 health authorities at national level focused more on global information about the virus, while  
277 local authorities failed to succeed in providing their “share of information” [68]. Another study,  
278 which focused on analyzing the online communication of Public Health Agencies from Italy,  
279 United States and Sweden, revealed that compared to Sweden and the United States, agencies  
280 from Italy collaborated more with other organizations, and that overall, the communication  
281 process of the agencies was coordinated by their members, that agencies also communicated  
282 with governments, but they rarely collaborated with political or non-governmental  
283 organizations [69]. Hence, while trust in the government and communication from authorized  
284 organizations is essential, the importance of trusting the professionals is highlighted by a study  
285 conducted in Thailand, which showed that in the cases in which people have low levels of trust



286 in the government, trust in professionals can have a positive influence on the adoption of  
287 protective measures at the individual level [70].

288 Furthermore, another previous study conducted in Poland, revealed that information  
289 can have the power to influence the level of trust that people have in the healthcare system  
290 and in healthcare professionals, suggesting that an increase of trust in hospitals, may be  
291 associated with a decrease of trust in physicians [71].

292 While focusing on studying people's response to non- pharmaceutical interventions,  
293 conspiracy theories and alternative treatments, a study conducted in Finland showed that the  
294 level of trust people have in the system implemented in order to provide information about the  
295 virus, has an essential role in the way people react to the official measures recommended.  
296 Hence, most participants in the study were between 40 and 60 years of age, and the study  
297 emphasized that people who were less willing to comply with the non-pharmaceutical  
298 interventions implemented by the government, tended to believe more in conspiracies and had  
299 low levels of trust in the sources which provided information about the virus [72].

300 Another study, which focused on examining the relationship between trust in the  
301 healthcare system and people's choice of seeking medical help when they experienced COVID –  
302 19 symptoms, concluded that high levels of trust in the healthcare system can increase the  
303 probability of asking for medical help when people first notice COVID – 19 symptoms [73].

304 Taking into account the aspects mentioned above, we can infer that peoples' trust in  
305 doctors was affected during the pandemic. In this regard, in the context of misinformation, one  
306 of the reasons why people lost trust in doctors may be the fact that, besides using social media  
307 for communicating information, for networking or for interacting with patients, many medical

308 or dental practitioners used social media to express their professional opinions about the virus,  
309 opinions which were not validated and which later proven to be inaccurate [74]. In other words,  
310 health professionals may have contributed to the spread of misinformation, and such behavior  
311 can contribute to the decrease of trust in medical processes and in healthcare professionals  
312 [75]. Other researchers who focused on examining medical misinformation, found that most  
313 doctors (94.2%) stated that patients had medical misinformation, and the subjects about they  
314 had the most inaccurate information were represented by COVID – 19 vaccines, COVID – 19  
315 origin, treatment or essential oils [76]. Furthermore, a previous study discovered that trust in  
316 doctors increased with age, and communication difficulties decreased, and that trust in doctors  
317 decreased while the level of education and communication difficulties increased [77].

318 Hence, while acknowledging that the pandemic influenced the trust in medical  
319 professionals, another aspect that was negatively influenced was the relationships between  
320 doctors and their patients. A study which focused on examining the doctor – patient interaction  
321 from the perspective of both groups of people, revealed differences in the respondents'  
322 opinions. Thus, most doctors stated that they still make eye contact (72%) and that they still  
323 show patients empathy, but only few patients declared that their doctors made eye contact  
324 (56,8%) or showed them empathy (43,2%) [78].

## 325 **Methods and materials**

### 326 **Sampling and data collection procedures**

327 The present study was conducted on Romanian healthcare professionals including doctors,  
328 nurses and medical students. The questionnaire was administered online, the data was  
329 collected through the help of Google forms, and was disseminated on groups of healthcare

330 professionals and students on platforms such as Facebook and WhatsApp, during the period  
331 April 2021– June 2021. The data we collected was firstly exported to Microsoft Excel, and then  
332 it was analyzed with IBM Statistical Package for the Social Sciences, version 20. At the beginning  
333 of the questionnaire, the respondents were informed about the purpose of the study, about  
334 the fact that they were allowed to withdraw at any time, and they were asked to give their  
335 consent for participating in the study. The average time needed to complete the questionnaire  
336 was 15 minutes, and the research received approval from The Council of the Faculty of  
337 Sociology and Communication, approval request Nr.378/30.03.2021.

338         The sample of our study comprises 536 respondents. Out of the 536 respondents, 460  
339 (85.8%) were female and 76 (14.2%) were male. A total of 411 respondents live in the urban  
340 area (76.7%), while 125 (23.3%) live in the rural area. Most respondents (286, 53.4%) are  
341 between 18 and 35 years of age, 142 respondents (26.5%) are between 36 and 50 years of age,  
342 102 respondents (19.0%) are between 51 and 65 years of age, and 6 of them (1.1) are over 65  
343 years of age. When it comes to the professional degree of the respondents, most of them are  
344 students at a university nursing program (122, 22.8%), and medical students (120, 22.4%).  
345 However, a total of 102 respondents (19.0%) are senior specialists medical – doctors, and 70  
346 (13.1%) are nurses who have a higher education diploma. When it comes to the respondents  
347 field of specialization, most of them (70.5%) operate in the field of general medicine, while  
348 others are family doctors (10.4%), pediatricians (3%), dentists or oncologists (1.9%), surgeons of  
349 doctors who are specialized in internal medicine (1.5%), or infectious disease doctors,  
350 radiologists or cardiologists (1.1%). Furthermore, most of the respondents (77.2%) stated that  
351 they did not work a unit with COVID – 19 patients while few of them (22.8%) stated that they

352 worked in such a unit at the time the research was conducted. Thus, all the characteristics of  
 353 the sample are presented in Table 1.

354 **Table 1.** Sample characteristics (n = 536).

|                         | <b>Category</b>                                | <b>Count</b> | <b>Percentage</b> |
|-------------------------|------------------------------------------------|--------------|-------------------|
| Gender                  | Female                                         | 460          | 88.8%             |
|                         | Male                                           | 76           | 14.2%             |
| Living environment      | Urban                                          | 411          | 76.7%             |
|                         | Rural                                          | 125          | 23.3%             |
| Age                     | 18-35 years old                                | 286          | 53.4%             |
|                         | 36-50 years old                                | 142          | 26.5%             |
|                         | 51 -65 years old                               | 102          | 19.0%             |
|                         | Over 65 years old                              | 6            | 1.1%              |
| Professional degree     | Senior specialist medical - doctor             | 102          | 19.0%             |
|                         | Specialist medical - doctor                    | 46           | 8.6%              |
|                         | Resident                                       | 28           | 5.2%              |
|                         | Nurse with higher education diploma            | 70           | 13.1%             |
|                         | Nurse with other studies than higher education | 48           | 9.0%              |
|                         | Medical student                                | 120          | 22.4%             |
|                         | Student at university nursing program          | 122          | 22.8%             |
|                         |                                                |              |                   |
| Field of specialization | General medicine                               | 378          | 70.5%             |
|                         | Family doctor                                  | 56           | 10.4%             |
|                         | Pediatrics                                     | 16           | 3%                |
|                         | Stomatology                                    | 10           | 1.9%              |
|                         | Oncology                                       | 10           | 1.9%              |
|                         | Surgery                                        | 8            | 1.5%              |
|                         | Internal medicine                              | 8            | 1.5%              |
|                         | Virology/ infectious disease doctor            | 6            | 1.1%              |
|                         | Cardiology                                     | 6            | 1.1%              |
|                         | Radiology                                      | 6            | 1.1%              |

|                          | Other | 32  | 6%    |
|--------------------------|-------|-----|-------|
| Works in a unit          | Yes   | 122 | 22.8% |
| with COVID – 19 patients | No    | 414 | 77.2% |

355

356

## 357 **The research instrument**

358 In order to conduct the research we used a quantitative method while having a questionnaire  
359 as an instrument. In this regard, we developed a questionnaire which comprises four sections:  
360 A. Influence of the pandemic on the professional activity of medical staff (items A1 to A4), B.  
361 Perception about the authorities' communication process (items B1 to B11), C. Perception  
362 about the communication of non- validated treatments (items C1 to C20), and D.  
363 Sociodemographic questions (items D1 – D9), such as: gender, age, living environment,  
364 professional degree, field of specialization. The sociodemographic questions were used in order  
365 to identify different or similar attitudes between specific groups. The questionnaire can be  
366 found in "S1.Appendix English version of the questionnaire", and in "S2. Appendix Romanian  
367 version of the questionnaire." Before disseminating the questionnaire, the instrument was  
368 tested on 30 doctors who work in the field of cardiology and general medicine. The  
369 respondents understood clearly the questions and did not report any issue in the process of  
370 answering them. Hence, the questionnaire comprises close ended and open ended questions  
371 (Items A1, A4,B3, B11, C19, C20, D2, D5, D6,) dihotomic questions as well as questions whose  
372 answers were measured on a 7 point Likert scale. For example, item A2 measured the extent to  
373 which the respondents considered that the pandemic influenced the way they carried out their

374 professional activity (1- “to an extremely little extent, 7 “to an extremely great extent”), or item  
375 B2 measure the respondents’ level of agreement with statements regarding the way authorities  
376 communicated during the pandemic (1 – “strongly disagree, 7-“ strongly agree”).

377

## 378 **Data analysis**

379 Data was analyzed with IBM Statistical Package for the Social Sciences, version 20. In order to  
380 analyze the data and identify differences and similarities between the attitudes of certain  
381 groups, t tests for independent samples were performed. The t test were performed among  
382 groups: male/female, working in unit with COVID – 19 patients/ not working in unit with COVID  
383 – 19 patients, urban/rural area, and professional degree: medical staff/students. Hence, in  
384 order to be able to analyze the results depending on professional degree, we computed the  
385 variable of professional degree which had the following values: senior specialist medical –  
386 doctor, specialist medical – doctor, resident, nurse with higher education diploma, nurse with  
387 other studies than higher education, medical student, student at university nursing program, in  
388 a new variable. Thus, doctors, nurses and residents, were integrated in a new group called  
389 “medical staff”, while medical students and students at university nursing programs were  
390 integrated in the group “students”. Moreover, for a better understanding of the way some  
391 variables correlate with each other, (for example: respondents satisfaction with the way  
392 authorities communicated during the pandemic and age, respondents’ opinion about the way  
393 misinformation about alternative treatments influenced doctors’ credibility and age), we also  
394 calculated the Pearson coefficient.

395 **Results**

396 **1) To what extent information about alternative treatments affected**  
397 **the credibility of medical staff?**

398  
399 The results of our research revealed that respondents were of the opinion that information  
400 about alternative treatments for COVID -19 affected the credibility of healthcare professionals.  
401 Hence, most respondents (32.5%), stated that trust in healthcare professionals was affected to  
402 a an extremely great extent by the information about alternative treatments, many of them  
403 declared that credibility was affected to a very great extent (23.1%), and to a great extent  
404 (21.3%) (Table 1).

**Table 1.** The extent to which information about alternative treatments affected trust in physicians

|                                            | Frequency | Percent | Valid Percent | Cumulative Percent |
|--------------------------------------------|-----------|---------|---------------|--------------------|
| Valid to an extremely little extent        | 14        | 2.6     | 2.6           | 2.6                |
| to a very little extent                    | 10        | 1.9     | 1.9           | 4.5                |
| to a little extent                         | 42        | 7.8     | 7.8           | 12.3               |
| nor to a little, neither to a great extent | 58        | 10.8    | 10.8          | 23.1               |
| to a great extent                          | 114       | 21.3    | 21.3          | 44.4               |
| to a very great extent                     | 124       | 23.1    | 23.1          | 67.5               |
| to an extremely great extent               | 174       | 32.5    | 32.5          | 100.0              |
| Total                                      | 536       | 100.0   | 100.0         |                    |

405  
406 Furthermore, the Pearson correlation performed between the extent to which  
407 respondents believed that information about alternative treatments affected people’s trust in  
408 doctors and the age of the respondents, revealed a weak, negative and statistically significant  
409 correlation between the two variables ( $r(534) = -.155, p=0.001$ ) (Table 2). Hence, as the age of

410 the medical staff decreases, the extent to which they believe the credibility of doctors was  
 411 affected increases. In other words, compared to older healthcare professionals, younger  
 412 healthcare professionals tend to believe more that information about alternative treatments  
 413 affected trust in doctors. One possible explanation for this result can be that younger people  
 414 tend to be fonder of keeping up with trends and being up to date, and in this context, it is  
 415 possible that they came into contact more frequently with information about certain  
 416 alternative treatments for COVID – 19, this making them more aware about the way such  
 417 treatments can undermine doctor’s credibility.

**Table 2.** Pearson correlation between information about alternative treatments and age

|                                                                                                |                     | C14. The extent to which information about alternative treatments affected trust in physicians | D2. Age |
|------------------------------------------------------------------------------------------------|---------------------|------------------------------------------------------------------------------------------------|---------|
| C14. The extent to which information about alternative treatments affected trust in physicians | Pearson Correlation | 1                                                                                              | -.155** |
|                                                                                                | Sig. (2-tailed)     |                                                                                                | .000    |
|                                                                                                | N                   | 536                                                                                            | 536     |
| D2. Age                                                                                        | Pearson Correlation | -.155**                                                                                        | 1       |
|                                                                                                | Sig. (2-tailed)     | .000                                                                                           |         |
|                                                                                                | N                   | 536                                                                                            | 536     |

\*\* . Correlation is significant at the 0.01 level (2-tailed).

418  
 419 In order to observe if there any differences in the opinion of the respondents depending  
 420 on certain variables including, age, gender, or living environment, we performed t tests for  
 421 independent samples. The results of the significant t tests (Table 3), showed that students  
 422 believed to a greater extent (M= 5.60, SD=1.49), that information about alternative treatments  
 423 negatively affects the credibility of doctors, than the medical staff (M=5.33, SD=1.54). Also,  
 424 respondents who declared they worked in a unit without COVID – 19 patients (M=5.53,



SD=1.49), were more of the opinion that information about alternative cures affected trust in health professionals, than respondents who worked in a unit with COVID – 19 patients (M=5.19, SD=1.61). One possible explanation would be that, doctors who interacted with COVID – 19 patients may have observed that when being put in the situation to receive medical care in the hospital, patients still had faith and trust in doctors. Moreover, another explanation is that respondents who did not come into contact with COVID – 19 patients were not that close with the situation and thus they might have had a more distorted perception about the situation than those professionals who interacted with COVID – 19 patients. Moreover, the results of the research also showed that female respondents (M=5.51, SD=1.48), believed more than male respondents (M=5.10, SD=1.70), that trust in healthcare professionals was affected by the information about alternative treatments.

**Table 3.** Significant t-test results: comparisons between variables

|                                                                             | Group                          | N   | Mean | S. D. | t     | df  | p   | t-test for Equality of Means |                       |           |       |
|-----------------------------------------------------------------------------|--------------------------------|-----|------|-------|-------|-----|-----|------------------------------|-----------------------|-----------|-------|
|                                                                             |                                |     |      |       |       |     |     | Mean Difference              | Std. Error Difference | CI4 Lower | Upper |
| Information about alternative treatments _ Professional degree <sup>1</sup> | Medical staff                  | 294 | 5.33 | 1.54  | -2.04 | 534 | .04 | -.27                         | .13                   | -.52      | -.01  |
|                                                                             | Student                        | 242 | 5.60 | 1.49  |       |     |     |                              |                       |           |       |
| Information about alternative treatments _working unit                      | Unit with COVID -19 patients   | 122 | 5.19 | 1.61  | -2.13 | 534 | .03 | -.33                         | .15                   | -.64      | -.02  |
|                                                                             | Unit without COVID 19 patients | 414 | 5.53 | 1.49  |       |     |     |                              |                       |           |       |
| Information about alternative treatments _gender                            | Male                           | 76  | 5.10 | 1.70  | -2.16 | 534 | .03 | -.40                         | .18                   | -.77      | -.03  |
|                                                                             | Female                         | 460 | 5.51 | 1.48  |       |     |     |                              |                       |           |       |

437 <sup>1</sup>Index variable from the professional degrees of respondents. Student: medical student and student at university  
 438 nursing program, Medical Staff: Senior specialist medical – doctor, Specialist medical – doctor, Resident, Nurse  
 439 with higher education diploma, Nurse with other studies than higher education

440  
 441 **2) What is the knowledge of medical staff about the type of drugs that**  
 442 **had positive effects on treating the disease and about alternative**  
 443 **treatments?**

444  
 445 Considering the type of drugs which were known to have positive effects on treating the virus,  
 446 the research revealed that type of drug about which the respondents have heard it had positive  
 447 effects against the virus was Dexamethasone (46.6%), closely followed by Remdesivir (40.5%)  
 448 and Azithromicin (38.4%). However, some of the respondents also mentioned Chloroquine,  
 449 Hydroxychloroquine (23.1%), Ibuprofen (19.8%), Tocilizumab (15.9%), and Favipiravir (13.8%) as  
 450 drugs known to have positive effects when dealing with COVID – 19 (Table 4). Hence, the  
 451 research showed that the medical staff had knowledge about the type of drugs tested or used  
 452 against the virus, which were taught to be efficient in treating the disease.

453 **Table 4.** Drugs known to have positive effects in treating the virus: the perception of medical  
 454 staff

|                                        | Frequency | Valid percent |
|----------------------------------------|-----------|---------------|
| Amoxicillin                            | 36        | 6.7%          |
| Azithromicin                           | 206       | 38.4%         |
| Chloroquine,<br>Hydroxychloroquine     | 124       | 23.1%         |
| Dexamethasone                          | 250       | 46.6%         |
| Doxycycline                            | 32        | 6.0%          |
| Favipiravir                            | 74        | 13.8%         |
| Ibuprofen                              | 106       | 19.8%         |
| Lopinavir/Ritonavir                    | 56        | 10.4%         |
| Oseltamivir, Peramivir<br>or Zanamivir | 32        | 6.0%          |
| Remdesivir                             | 217       | 40.5%         |
| Tocilizumab                            | 85        | 15.9%         |

|            |    |      |
|------------|----|------|
| Umifenovir | 17 | 3.2% |
|------------|----|------|

455

456 In the context of respondents' perception about alternative methods of preventing and treating  
 457 the virus, the findings show that, most of them stated that they heard about the fact that  
 458 alcohol consumption can prevent the infection with the virus (24.3%), that drinking warm water  
 459 every 15 minutes may help eliminate the virus (21.3%), but also that pointing the hot air of the  
 460 hairdryer to the nostrils leads to the elimination of the virus (16.8%) (Table 5).

**Table 5.** Medical staff's knowledge about alternative methods of preventing and treating the virus

|                                                                        | Frequency | Percent | Valid Percent | Cumulative Percent |
|------------------------------------------------------------------------|-----------|---------|---------------|--------------------|
| drinking alcohol helps you eliminate the virus                         | 79        | 14.7    | 14.7          | 14.7               |
| drinking alcohol prevents the infection with the virus                 | 130       | 24.3    | 24.3          | 39.0               |
| rinsing the nostrils with disinfectant eliminates the virus            | 81        | 15.1    | 15.1          | 54.1               |
| Valid drinking hot water every 15 minutes eliminates the virus         | 114       | 21.3    | 21.3          | 75.4               |
| pointing hot air to the nostrils leads to the elimination of the virus | 90        | 16.8    | 16.8          | 92.2               |
| other                                                                  | 42        | 7.8     | 7.8           | 100.0              |
| Total                                                                  | 536       | 100.0   | 100.0         |                    |

461

462 **3) How satisfied is the medical staff with the way medical and non-**  
 463 **medical information was communicated during the pandemic?**

464

465 The findings of the study revealed that respondents were mostly dissatisfied with the way  
 466 medical and non – medical information was communicated during the pandemic. Hence, the

467 sum of the responses with negative valences of the study participants (extremely dissatisfied,  
 468 very dissatisfied and dissatisfied), showed that 238 of them, (44.4%) were dissatisfied with the  
 469 process of sending medical and non- medical information, while the sum of the positive  
 470 responses (satisfied, very satisfied, extremely satisfied) showed that 162 of them (30.2%),  
 471 were satisfied with the communication process (Table 6). In other words, the study highlighted  
 472 that respondents registered mostly low level of satisfaction with the way information was sent  
 473 during the pandemic.

474

**Table 6.** The level of satisfaction with the way information about drugs used to treat the virus were communicated at national level

|                                        | Frequency | Percent | Valid Percent | Cumulative Percent |
|----------------------------------------|-----------|---------|---------------|--------------------|
| extremely dissatisfied                 | 52        | 9.7     | 9.7           | 9.7                |
| very dissatisfied                      | 76        | 14.2    | 14.2          | 23.9               |
| dissatisfied                           | 110       | 20.5    | 20.5          | 44.4               |
| Nor dissatisfied,<br>neither satisfied | 136       | 25.4    | 25.4          | 69.8               |
| satisfied                              | 108       | 20.1    | 20.1          | 89.9               |
| very satisfied                         | 30        | 5.6     | 5.6           | 95.5               |
| Extremely satisfied                    | 24        | 4.5     | 4.5           | 100.0              |
| Total                                  | 536       | 100.0   | 100.0         |                    |

475

476 Furthermore, in the context of the medical staff's satisfaction with the way information  
 477 about drugs used to treat the virus was communicated at national level, the research showed  
 478 that as age of the respondents decreases, the level of satisfaction increases ( $r(534) = -.091$ ,  
 479  $p=0.035$ ) (Table 7). Thus, according to this result, it can be inferred that younger people were  
 480 more satisfied than older people, with how information about drugs used to treat the virus was  
 481 communicated.

**Table 7.** Pearson Correlation: satisfaction with the way information about drugs used to treat the virus was communicated and age

|                                                                                                 |                     | B10. Satisfaction with the way information about drugs used to treat the virus was communicated | D2. Age |
|-------------------------------------------------------------------------------------------------|---------------------|-------------------------------------------------------------------------------------------------|---------|
| B10. Satisfaction with the way information about drugs used to treat the virus was communicated | Pearson Correlation | 1                                                                                               | -.091*  |
|                                                                                                 | Sig. (2-tailed)     |                                                                                                 | .035    |
|                                                                                                 | N                   | 536                                                                                             | 536     |
| D2. Age                                                                                         | Pearson Correlation | -.091*                                                                                          | 1       |
|                                                                                                 | Sig. (2-tailed)     | .035                                                                                            |         |
|                                                                                                 | N                   | 536                                                                                             | 536     |

\*. Correlation is significant at the 0.05 level (2-tailed).

482

483

Moreover, when asked to evaluate the efficiency of the communication strategies

484

adopted by authorities in order to send information about the virus, most respondents stated

485

that the strategies were effective. Thus, the sum of the responses with negative valences shows

486

that 144 of them (26, 9%) described the communication strategies as inefficient, while 266 of

487

them (49, 6%) described them as efficient (Table 8). One interesting result of the analysis, was

488

that, when trying to examine if the responses of the study participants about the efficiency of

489

communication strategies differ depending on certain variables such as working unit, gender,

490

working unit, living environment, the analysis found no differences between the responses of

491

males and females, of people working in units without COVID – 19 patients and people not

492

working in units with COVID – 19 patients, or in people from the rural and urban area.

**Table 8.** Perception about the efficiency of communication strategies adopted by authorities

|                                          | Frequency | Percent | Valid Percent | Cumulative Percent |
|------------------------------------------|-----------|---------|---------------|--------------------|
| Extremely inefficient                    | 22        | 4.1     | 4.1           | 4.1                |
| very inefficient                         | 38        | 7.1     | 7.1           | 11.2               |
| inefficient                              | 84        | 15.7    | 15.7          | 26.9               |
| Valid nor efficient, neither inefficient | 126       | 23.5    | 23.5          | 50.4               |
| efficient                                | 134       | 25.0    | 25.0          | 75.4               |
| very efficient                           | 80        | 14.9    | 14.9          | 90.3               |
| extremely efficient                      | 52        | 9.7     | 9.7           | 100.0              |
| Total                                    | 536       | 100.0   | 100.0         |                    |

493

494 In the context of the information about drugs tested and used in the treatment against COVID –  
 495 19, the results showed that students believe to a greater extent that such information was  
 496 communicated in a coherent manner (M=4.05, SD=1.63), than the medical staff (M=3.79,  
 497 SD=1.53) (t(534)= -2.05, p<0.05) (Table 9.). Hence, one possible explanation for this result  
 498 would be that, due the experience and knowledge of the medical staff, people who were  
 499 already working in the healthcare system, such people have greater expectations from  
 500 authorities when it comes to sending medical information, than medical students.

501 **Table 9. Significant t test for information about drugs used to treat the virus and professional**

502

**degree**

|                                                                                                              | Group         | N   | Mean | S. D. | t     | df  | p   | t-test for Equality of Means |                       |          |       |
|--------------------------------------------------------------------------------------------------------------|---------------|-----|------|-------|-------|-----|-----|------------------------------|-----------------------|----------|-------|
|                                                                                                              |               |     |      |       |       |     |     | Mean Difference              | Std. Error Difference | Lower CI | Upper |
| Information about drugs tested and used to treat the disease <sup>1</sup> _ Professional degree <sup>2</sup> | Medical staff | 294 | 3.79 | 1.53  | -2.05 | 534 | .03 | -.28                         | .13                   | -.55     | -.01  |
|                                                                                                              | Student       | 242 | 4.05 | 1.63  |       |     |     |                              |                       |          |       |

503 <sup>1</sup> The extent to which respondents believe that information about drugs tested and used to treat the virus  
 504 was communicated in a coherent manner  
 505 <sup>2</sup> Index variable from the professional degrees of respondents. Student: medical student and student at  
 506 university nursing program, Medical Staff: Senior specialist medical – doctor, Specialist medical – doctor,  
 507 Resident, Nurse with higher education diploma, Nurse with other studies than higher education  
 508

509 **(4) What is the perception of medical staff about the role of social**  
 510 **media in spreading misinformation about the virus?**

511  
 512 The results of the research revealed that respondents were inclined to believe more that social  
 513 media was a proper environment for spreading fake medical information during the pandemic.  
 514 By analyzing the information from Table 10, it can be observed that the sum of the responses  
 515 with negative valences (4.5%) (to an extremely little extent, to a very little extent and to a little  
 516 extent) is much lower than the sum of the responses with positive valences (89.9%) ( to an  
 517 extremely great extent, to a very great extent, to a great extent). Hence, most participants of  
 518 the study believe that social media platforms favored the transmission of fake medical news  
 519 during the pandemic. Furthermore, when trying to find differences in the responses of the  
 520 participants depending on age, gender, living environment, professional degree or working unit  
 521 (with COVID – 19 patients or without COVID – 19 patients), we observed that their responses  
 522 did not differ depending on such variables. Thus, it can be inferred that, regardless of age,  
 523 gender, living environment, professional degree or working unit, respondents’ perception was  
 524 that social media had a role in spreading fake medical information.

**Table 10.** Perception about the extent to which social media contributed to the spread of medical fake news

|       | Frequency                     | Percent | Valid Percent | Cumulative Percent |
|-------|-------------------------------|---------|---------------|--------------------|
| Valid | to an extremely little extent | 2       | .4            | .4                 |
|       | to a very little extent       | 10      | 1.9           | 2.2                |
|       | to a little extent            | 12      | 2.2           | 4.5                |

|                                               |     |       |       |       |
|-----------------------------------------------|-----|-------|-------|-------|
| nor to a little, neither<br>to a great extent | 30  | 5.6   | 5.6   | 10.1  |
| to a great extent                             | 62  | 11.6  | 11.6  | 21.6  |
| to a very great extent                        | 88  | 16.4  | 16.4  | 38.1  |
| to an extremely great<br>extent               | 332 | 61.9  | 61.9  | 100.0 |
| Total                                         | 536 | 100.0 | 100.0 |       |

525  
526           However, even though respondents were of the opinion that social media was an  
527 environment in which was sent fake medical information, some of them still believe that social  
528 media platforms are appropriate for sending official information about the virus. Thus,  
529 considering the results from Table 11, the sum of responses with positive valences (40.3%) is  
530 almost equal to the sum of responses with negative valences (45.1%) meaning that the opinions  
531 of the study participants were divided when it comes to sending official information about the  
532 virus on social media.

**Table 11.** Perception about the extent to which social media represents an appropriate environment for sharing official COVID – 19 information

|                                                       | Frequency | Percent | Valid Percent | Cumulative Percent |
|-------------------------------------------------------|-----------|---------|---------------|--------------------|
| to an extremely little<br>extent                      | 86        | 16.0    | 16.0          | 16.0               |
| to a very little extent                               | 78        | 14.6    | 14.6          | 30.6               |
| to a little extent                                    | 52        | 9.7     | 9.7           | 40.3               |
| Valid   nor to a little, neither<br>to a great extent | 78        | 14.6    | 14.6          | 54.9               |
| to a great extent                                     | 72        | 13.4    | 13.4          | 68.3               |
| to a very great extent                                | 74        | 13.8    | 13.8          | 82.1               |
| to an extremely great<br>extent                       | 96        | 17.9    | 17.9          | 100.0              |
| Total                                                 | 536       | 100.0   | 100.0         |                    |

533  
534           A factor which showed a weak but statistically significant influence on respondents' opinion  
535 about sending COVID – 19 official information on social media was age. Hence, the results of



536 the Pearson correlation ( $r(534) = -.175, p=0.000$ ), showed that as age decreases, the extent to  
 537 which respondents believed that social media is an environment in which official information  
 538 about the virus should be communicated decreases (Table 12). In other words, younger  
 539 respondents believed to a greater extent than older respondents that official information  
 540 should also be communicated on social media. One possible explanation for this results would  
 541 be that young people gather most of their information from online sources, and they also  
 542 engage more with social media platforms, and thus it is possible that they would also like to see  
 543 official and important information on such platforms.

**Table 12. Person correlation between the extent to which social media represents an appropriate environment for sharing official COVID – 19 info and age**

|                                                                                                                 |                     | C1. The extent to which social media represents an appropriate environment for sharing official COVID – 19 info | D2. Age |
|-----------------------------------------------------------------------------------------------------------------|---------------------|-----------------------------------------------------------------------------------------------------------------|---------|
| C1. The extent to which social media represents an appropriate environment for sharing official COVID – 19 info | Pearson Correlation | 1                                                                                                               | -.175** |
|                                                                                                                 | Sig. (2-tailed)     |                                                                                                                 | .000    |
|                                                                                                                 | N                   | 536                                                                                                             | 536     |
|                                                                                                                 | Pearson Correlation | -.175**                                                                                                         | 1       |
| D2. Age                                                                                                         | Sig. (2-tailed)     | .000                                                                                                            |         |
|                                                                                                                 | N                   | 536                                                                                                             | 536     |

\*\* . Correlation is significant at the 0.01 level (2-tailed).

544  
 545 Furthermore, when dividing the study participants in medical staff (doctors, nurses) and  
 546 students (medical students or students at the university nursing programs), we found that  
 547 students ( $M=4.31, SD=2.11$ ) believed to a greater extent than the medical staff ( $M= 3.88,$   
 548  $SD=2.07$ ) that official information about the virus should also be sent on social media ( $t(534) = -$

2.36,  $p < 0.05$ ) (Table 13). Next, when dividing the sample by living environment, participants living in the urban area ( $M=4.19$ ,  $SD=2.10$ ) were inclined more than those living in the rural area ( $M=3.72$ ,  $SD=2.05$ ), to believe that official information could also be sent on social media ( $t(534) = 2.23$ ,  $p < 0.05$ ) (Table 13).

**Table 13. Significant t tests for sharing official information on social media professional degree and living environment**

|                                                                         | Group         | N   | Mean | S. D. | t     | df  | p   | t-test for Equality of Means |                       |       |       |
|-------------------------------------------------------------------------|---------------|-----|------|-------|-------|-----|-----|------------------------------|-----------------------|-------|-------|
|                                                                         |               |     |      |       |       |     |     | Mean Difference              | Std. Error Difference | Lower | Upper |
| Official information on social media _ Professional degree <sup>1</sup> | Medical staff | 294 | 3.88 | 2.07  | -2.36 | 534 | .01 | -.42                         | .18                   | -.78  | -.07  |
|                                                                         | Student       | 242 | 4.31 | 2.11  |       |     |     |                              |                       |       |       |
| Official information on social media _ living environment               | Urban area    | 411 | 4.19 | 2.10  | 2.23  | 534 | .02 | .47                          | .21                   | .05   | .89   |
|                                                                         | Rural area    | 125 | 3.71 | 2.05  |       |     |     |                              |                       |       |       |

<sup>1</sup>Index variable from the professional degrees of respondents. Student: medical student and student at university nursing program, Medical Staff: Senior specialist medical – doctor, Specialist medical – doctor, Resident, Nurse with higher education diploma, Nurse with other studies than higher education

**(5) What aspects of the professional activity of the medical staff were affected most by the COVID – 19 pandemic?**

The findings of our research showed that most respondents stated that the patient – doctor relationship was most affected by the pandemic (38.4%). However, a smaller percent of respondents declared that the working schedule was the most affected (26.9%), or the collaboration with their peers (23.9%) (Table 14).

**Table 14. The aspect of professional life which was most influenced by the pandemic**

| Frequency | Percent | Valid Percent | Cumulative Percent |
|-----------|---------|---------------|--------------------|
|-----------|---------|---------------|--------------------|

|       |                               |     |       |       |       |
|-------|-------------------------------|-----|-------|-------|-------|
|       | patient – doctor relationship | 206 | 38.4  | 38.4  | 38.4  |
|       | work schedule                 | 144 | 26.9  | 26.9  | 65.3  |
| Valid | collaboration with peers      | 128 | 23.9  | 23.9  | 89.2  |
|       | other                         | 58  | 10.8  | 10.8  | 100.0 |
|       | Total                         | 536 | 100.0 | 100.0 |       |

566  
567 Furthermore, taking into account the group of medical staff (doctors, nurses) and the group of  
568 students ( medical students and students at university nursing program), the results revealed  
569 that the most respondents who stated that the patient- doctor relationship was affected most  
570 by the pandemic was the group of medical staff (144 compared to 62) (Table 15). One possible  
571 explanation for this result is that, by being in constant contact with their patients, doctors and  
572 nurses were more inclined to perceive that the relation with their patients has deteriorated  
573 during the pandemic.

574  
**Table 15.** Main aspect of professional life influenced by the pandemic \*  
professional degree - Cross tabulation

|                                                                 |                               | Professional degree <sup>1</sup> |         | Total |
|-----------------------------------------------------------------|-------------------------------|----------------------------------|---------|-------|
|                                                                 |                               | Medical staff                    | Student |       |
| A3. Main aspect of professional life influenced by the pandemic | patient – doctor relationship | 144                              | 62      | 206   |
|                                                                 | work schedule                 | 70                               | 74      | 144   |
|                                                                 | collaboration with peers      | 62                               | 66      | 128   |
|                                                                 | other                         | 18                               | 40      | 58    |
| Total                                                           |                               | 294                              | 242     | 536   |

575 <sup>1</sup>Index variable from the professional degrees of respondents. Student: medical student and student at university  
576 nursing program, Medical Staff: Senior specialist medical – doctor, Specialist medical – doctor, Resident, Nurse  
577 with higher education diploma, Nurse with other studies than higher education

578  
579  
580

## 581 **Discussion**

582 During the COVID – 19 pandemic, one of the major issues people had to face, was the spread of  
583 misinformation about the virus, its origins and its treatment. In this regard, we analyzed the  
584 perception of medical staff (including doctors, nurses, medical students and students in the  
585 university nursing program) about the way medical and non – medical information was  
586 communicated during the pandemic. In the context of the so called infodemic [11], and the  
587 effects of misinformation on people’s trust in doctors, most participants of our study declared  
588 that the information about alternative treatments for the virus affected the credibility of health  
589 professionals. Hence, from this point of view, our study is in line with previous studies which  
590 highlighted the fact that lately, trust in physician decreased [67], and which suggested that  
591 social media managed to determine people to trust the personal opinions of other people  
592 rather than the opinion of the professionals [61]. Furthermore, since other researchers pointed  
593 out that many medical practitioners used social media to express professional opinions that  
594 were later found inaccurate [74], and thus they may have contributed to the spread of  
595 misinformation [75], we argue that the credibility of physicians might have also been affected  
596 by this type of behavior.

597 An interesting result of our research showed that as the age of medical staff decreases,  
598 the extent to which they believe that information about alternative treatments affects doctors’  
599 credibility increases. Hence, younger healthcare professionals believed to a greater extent than  
600 older healthcare professionals, that information about alternative treatments affected  
601 negatively people’s trust in doctors. This results might have as possible explanation, the fact  
602 that younger people tend to spend more time on social media platforms, and they may have

603 interacted more than older professionals, with misinformation about the virus, this making  
604 them more able to be aware of the negative effects of fake news. Moreover, the type of unit in  
605 which the respondents worked, was a factor which influenced the opinion of the respondents,  
606 our findings showing that, the medical staff who did not work in unit with COVID -19 patients,  
607 believed to a greater extent than those who worked in such units, that information about  
608 alternative treatments negatively influenced doctors' credibility. Given this result we argue that  
609 is it possible for those professionals who did not interact with COVID -19 patients, and who thus  
610 were more distant from the situation, to have a more distorted image regarding the way  
611 people's levels of trust in them changed in the context of the pandemic.

612         Considering the role of social media in spreading misinformation, our study is in line  
613 with previous studies which support the idea that such channels favored the communication of  
614 fake news during the pandemic [49, 50, 51]. In this regard, regardless of age, professional  
615 degree or living environment, most healthcare professionals who participated in our study were  
616 of the opinion that social media contributed to the spread of misinformation. However, our  
617 study also showed that when it comes to communicating official information on social media,  
618 younger respondents (students) believed to a greater extent than older respondents (doctors,  
619 nurses), that such channels should be used to send official information about the virus. Taking  
620 into account these results, the fact that healthcare professionals acknowledge that social media  
621 favors the spread of misinformation, and that many of them still believe they should be used in  
622 order to communicate official information, shows that at personal level, professionals were not  
623 affected that much by misinformation, them being able to differentiate more easily between  
624 real and fake news. In other words, we argue that while people in general were negatively

625 influenced by the fake news they read on social media, as it was shown in previous studies  
626 which highlighted that people trusted the information on social networks, they shared un-  
627 validated information and had trouble with differentiating real from fake news [57, 79] or that  
628 exposure to health misinformation may influence people's intention to engage in certain  
629 behaviors [80], healthcare professionals may be less influenced by fake news, due to their  
630 knowledge.

631         Considering the knowledge of medical staff about the type of drugs that had positive  
632 effects on treating the virus, the findings of the research showed that the respondents had  
633 opinions which were in line with the results found in other studies. Hence, according to the  
634 research, most respondents stated that the drug which was known to have positive effects  
635 against the virus was Dexamethasone (46.6%), it being followed by Remdesivir (40.5%). Thus,  
636 positive effects of Dexamethasone were also highlighted by studies [31, 32], while study [35]  
637 showed positive effects of Remdesivir.

638         In the context of medical staff's knowledge about alternative treatments, most  
639 respondents declared they had heard about the fact that alcohol can prevent the infection, that  
640 warm water drunk every 15 minutes, and the hot air from the hairdryer pointed to the nostrils  
641 can help eliminate the virus. From this point of view, our study is in line with a previous study  
642 [53], which also described these methods.

643         When it comes to the respondents' level of satisfaction about the way medical and non  
644 – medical information was communicated during the pandemic, generally, the research  
645 revealed that most respondents were dissatisfied with the communication process. In the case  
646 of communication strategies adopted by authorities, the results showed that most respondents

647 were satisfied with them. However, in the context of sending information about the drugs used  
648 to treat the disease, the research showed that younger healthcare professionals were more  
649 satisfied with the communication process than older healthcare professionals. This results  
650 might be due to the fact that physicians with more experience have higher expectations from  
651 authorities than students.

652 Another area on which we focused our research was the professional activity of the  
653 medical staff during the pandemic. In this regard, our findings revealed that, according to the  
654 respondents of our study, the aspect that was mostly affected by the pandemic was the doctor-  
655 patient relationship. Hence, our research is in line with other studies [78], which showed that  
656 the pandemic affected the way doctors interacted with their patients.

657 Furthermore, on the basis of the results of our study we argue that not only the process  
658 of vaccination created ethical issues, but also the process of communication [81]. Thus, these  
659 ethical issues were perceived by the medical staff and they would require a further examination  
660 in order to be able to create communication guides which can be regarded as essential  
661 instruments not only for the research process of the medical staff and healthcare professionals  
662 with management positions, but also for their current medical activity [82,83].

## 663 **Conclusions**

664 During the pandemic, healthcare professionals did not have to deal only with challenges  
665 regarding their health and the health of their patients, but also with the problems created by  
666 the spread of medical misinformation. In this regard, besides fighting the pandemic, physician  
667 also had to fight the so called infodemic. Fake news spread on social media about various  
668 alternative treatments for the virus and the opinions of certain professionals about treatment

669 methods which later proven to be inaccurate negatively influenced the credibility of doctors.  
670 Hence, according to the results of our research, generally, the medical staff (doctors, nurses,  
671 medical students, students at university nursing program), believed that information about  
672 alternative treatments affected people's trust in doctors, but younger healthcare professionals  
673 and those working in units without COVID - 19 patients believed to a greater extent than older  
674 healthcare professionals and people working in units with COVID – 19 patients that fake news  
675 about treatments for the virus affected the credibility of doctors.

676           Furthermore, regardless of age, age, gender, living environment, professional degree or  
677 working unit, the medical staff acknowledged the role of social media in spreading fake news,  
678 but when it comes to using social media in order to communicate official information, younger  
679 healthcare professionals were more inclined to believe that such networks were appropriate  
680 for the communication of official information. This results can suggest that while professionals  
681 were aware of the role of social media in spreading medical misinformation and in affecting  
682 trust in doctors, due to their knowledge, at personal level they were less affected by that type  
683 of information, many of them believing that social media should also be used for sending  
684 official information.

685           In the context of the drugs used to treat the virus, the results pointed out that the  
686 medical staff had knowledge about the drugs known to have positive effects in treating the  
687 virus, their perception being in line with previous studies which focused on this matter.  
688 Moreover, the medical staff was aware of the alternative treatments which were promoted on  
689 social media, the method of drinking alcohol in order to prevent the infection being the method  
690 that most of the respondents have heard about.



691           When it comes to the influence of the pandemic on the professional activity of the  
692 medical staff, the respondents declared that the aspect which was most affected was the  
693 doctor – patient relationship. In this regard, we argue that, by influencing peoples’ trust in  
694 doctors, the medical fake news spread during the pandemic, implicitly had a role in  
695 deteriorating the relation between doctors and their patients.

696           Therefore, the healthcare professionals were generally dissatisfied with the way medical  
697 and non – medical information was communicated during the pandemic, but younger  
698 professionals were satisfied than older professionals. Overall, the medical staff believed that  
699 fake news managed to undermine doctors’ credibility that social media platforms favor the  
700 spread of such news, and they had knowledge about the drugs which were known to have  
701 positive effects on the virus and about the alternative treatments.

702           Taking into account the results of the research, the paper has some theoretical and  
703 practical implications. From a theoretical point of view, the paper contributes to the literature  
704 on the matter of fake news and its influence on the trust of healthcare professionals, a strength  
705 of the paper being the fact that it analyzed the opinions of medical staff (doctors, nurses,  
706 medical students and students at university nursing program). From a practical point of view,  
707 the paper brings awareness to the phenomenon of fake news regarding medical treatments  
708 and the negative influence it has on doctors’ credibility. Another practical implication refers to  
709 the fact that the paper brings attention to the issue of using social media as a mean to  
710 communicate official information, many healthcare professionals, especially the younger ones,  
711 stating that such networks could be appropriate for sharing official information. Furthermore,  
712 by highlighting that the most affected aspect of the professional activity of doctors was the

713 relationship with their patients, the study also shows that actions need to be taken in order to  
714 restore people's trust in doctors and improve the process of communication between them.  
715 Hence, on the basis of the findings and implications of the study, we further discuss limitations  
716 and future research directions.

717

## 718 **Limitations and future research directions**

719 While our study proved relevant information regarding the perception of healthcare  
720 professionals about the way medical and non – medical information was communicated in time  
721 of the pandemic, it also has some limitations.

722 One limitation is represented by the fact that the perception of healthcare professionals  
723 was studied only by using quantitative methods. In this regard, a future research should focus  
724 on obtaining information from doctors while using qualitative methods too. Next, the study was  
725 conducted only on Romanian healthcare professionals, and thus, a future research should take  
726 into consideration a comparison between the opinions of professionals from different  
727 countries. Another limitation is represented by the fact that we only asked respondents to state  
728 the aspect which was most influenced by the pandemic, but we did not asked them to offer  
729 detail about other type of challenges encountered. Thus, a future research should focus on  
730 analyzing the extent to which aspects of the professional activity of doctors were affected, and  
731 on analyzing more deeply the challenges they had to face during the pandemic.

732 Furthermore, since our research revealed that many respondents believed that social  
733 media platforms could be appropriate for sharing official information, we draw attention to a  
734 problem that can arise in this context. Since people know that such platforms favor the spread

735 of fake news, if we encourage the use of social media in order to communicate official  
736 information, don't we risk to discredit that information as it is possible for people to consider  
737 that such information is fake too? We believe that this issue should be taken into account and  
738 studied in a future research.

## 739 **Author Contributions**

740 Conceptualization: Claudiu Coman, Maria Cristina Bularca

741 Data curation: Claudiu Coman, Liliana Rogoza, Angela Repanovici, Maria Cristina Bularca

742 Formal analysis: Maria Cristina Bularca, Claudiu Coman

743 Investigation: Claudiu Coman, Maria Cristina Bularca, Angela Repanovici, Liliana Rogoza

744 Methodology: Maria Cristina Bularca, Claudiu Coman

745 Project administration: Claudiu Coman, Liliana Rogoza, Angela Repanovici

746 Resources: Maria Cristina Bularca, Liliana Rogoza, Angela Repanovici

747 Supervision: Claudiu Coman, Liliana Rogoza, Angela Repanovici

748 Writing – original draft: Maria Cristina Bularca, Claudiu Coman

749 Writing – review & editing: Maria Cristina Bularca, Claudiu Coman, Liliana Rogoza, Angela  
750 Repanovici

751

752

753

## 754 **References**

- 755 **1.** Sanders JM, Monogue ML, Jodlowski TZ, Cutrell J. B.Pharmacologic Treatments for  
756 Coronavirus Disease 2019 (COVID-19): A Review. *JAMA*. 2020; 323(18):1824–1836.  
757 doi:10.1001/jama.2020.6019
- 758 **2.** Shereen MA, Khan S, Kazmi A, Bashir N, Siddique R. COVID-19 infection: Origin, transmission,  
759 and characteristics of human coronaviruses. *J Adv Res*. 2020; 24:91-98 doi:  
760 10.1016/j.jare.2020.03.005
- 761 **3.** Kristina SA, Herliana N, Hanifah S. The perception of role and responsibilities during covid-19  
762 pandemic: A survey from Indonesian pharmacists. *Int J Pharm Res*, 2020; 12(2). doi:  
763 10.31838/ijpr/2020.SP2.369
- 764 **4.** World Health Organization (WHO). Timeline of WHO's response to COVID-19. [Internet].  
765 World Health Organization. 2020 June 29 [cited 2020 Nov 27] Available from:  
766 <https://www.who.int/news/item/29-06-2020-covidtimeline>
- 767 **5.** European Centre for Disease Prevention and Control. COVID-19 situation update worldwide,  
768 as of 27 November 2020 [Internet]. European Centre for Disease Prevention and Control. 2020  
769 June 29 [cited 2021 Nov 25] Available from: [https://www.ecdc.europa.eu/en/geographical-](https://www.ecdc.europa.eu/en/geographical-distribution-2019-ncov-cases)  
770 [distribution-2019-ncov-cases](https://www.ecdc.europa.eu/en/geographical-distribution-2019-ncov-cases).
- 771 **6.** British Broadcasting Corporation. COVID vaccine: First 'milestone' vaccine offers 90%  
772 protection. [Internet]. 2020 Nov 9 [cited 2020 Nov 27] Available from:  
773 <https://www.bbc.com/news/health-54873105>.
- 774 **7.** Kommenda N, Jones FH. COVID vaccine tracker: when will a coronavirus vaccine be ready?  
775 [Internet]. The Guardian. 2020 Nov 10 [cited 2020 Nov 27] Available from:

776 [https://www.theguardian.com/world/ng-interactive/2020/nov/10/covid-vaccine-tracker-when-](https://www.theguardian.com/world/ng-interactive/2020/nov/10/covid-vaccine-tracker-when-will-a-coronavirus-vaccine-be-ready)  
777 [will-a-coronavirus-vaccine-be-ready](https://www.theguardian.com/world/ng-interactive/2020/nov/10/covid-vaccine-tracker-when-will-a-coronavirus-vaccine-be-ready)

778 **8.** Ahsan W, Javed S, Al Bratty M, Alhazmi HA, Najmi A. Treatment of SARS-CoV-2: How far have  
779 we reached? *Drug Discov Ther.* 2020; 14(2):67-72. doi: 10.5582/ddt.2020.03008

780 **9.** Kupferschmidt K, Cohen J. Race to find COVID-19 treatments accelerates. *Science.* 2020;  
781 367(6485): 1412-1413. doi: 10.1126/science.367.6485.1412

782 **10.** World Health Organization (WHO). Solidarity clinical trial for COVID-19 treatments  
783 [Internet]. World Health Organization 2019. [cited 2020 Nov 27] Available from:  
784 [https://www.who.int/emergencies/diseases/novel-coronavirus-2019/global-research-on-novel-](https://www.who.int/emergencies/diseases/novel-coronavirus-2019/global-research-on-novel-coronavirus-2019-ncov/solidarity-clinical-trial-for-covid-19-treatments)  
785 [coronavirus-2019-ncov/solidarity-clinical-trial-for-covid-19-treatments](https://www.who.int/emergencies/diseases/novel-coronavirus-2019/global-research-on-novel-coronavirus-2019-ncov/solidarity-clinical-trial-for-covid-19-treatments)

786 **11.** Zarocostas J. How to fight an infodemic. *The Lancet.* 2020; 395(10225):676. doi:  
787 10.1016/S0140-6736(20)30461-X

788 **12.** Tuccori M, Convertino I, Ferraro S, Cappello E, Valdiserra G, Focosi D et al. The Impact of the  
789 COVID-19 “Infodemic” on Drug-Utilization Behaviors: Implications for Pharmacovigilance. *Drug*  
790 *Saf.* 2020;43:699–709 doi:10.1007/s40264-020-00965-w

791 **13.** Rosa SGV, Santos WC. Clinical trials on drug repositioning for COVID-19 treatment. *Rev*  
792 *Panam Salud Publica.* 2020; 44: e40 doi: 10.26633/RPSP.2020.40

793 **14.** Sahraei Z, Shabani M, Shokouhi S, Saffaei A. Aminoquinolines against coronavirus disease  
794 2019 (COVID-19): chloroquine or hydroxychloroquine. *Int J Antimicrob Agents.* 2020;  
795 105945(10.1016) doi:10.1016/j.ijantimicag.2020.105945

796 **15.** White NJ, Watson JA, Høglund RM, Chan XHS, Cheah PY, Tarning J. COVID-19 prevention  
797 and treatment: A critical analysis of chloroquine and hydroxychloroquine clinical pharmacology.  
798 PLoS Med. 2020; 17(9): e1003252. doi:10.1371/journal.pmed.1003252

799 **16.** Liu J, Cao R, Xu M, Wang X, Zhang H, Hu H. et al. Hydroxychloroquine, a less toxic derivative  
800 of chloroquine, is effective in inhibiting SARS-CoV-2 infection in vitro. *Cell Discov.* 2020; 6(16)  
801 doi:10.1038/s41421-020-0156-0 .

802 **17.** Wang M, Cao R, Zhang L, Yang X, Liu J, Xu M. et.al. Remdesivir and chloroquine effectively  
803 inhibit the recently emerged novel coronavirus (2019-nCoV) in vitro. *Cell Res.* 2020; 30:269–  
804 271. doi:10.1038/s41422-020-0282-0

805 **18.** Davidescu EI, Odajiu I, Bunea T, Sandu G, Stratan L, Aramă V. et.al. Treatment with  
806 hydroxychloroquine in patients with covid-19. Experience of a neurology  
807 department. *Farmacia.* 2020; 68(4): 597-605. doi:10.31925/farmacia.2020.4.3

808 **19.** Gautret P, Lagier JC, Parola P, Meddeb L, Mailhe M, Doudier B. et.al. Hydroxychloroquine  
809 and azithromycin as a treatment of COVID-19: results of an open-label non-randomized clinical  
810 trial. *Int. J. Antimicrob. Agents.* 2020; 105949. doi:10.1016/j.ijantimicag.2020.105949.

811 **20.** Thomson K, Nachlis H. Emergency Use Authorizations During the COVID-19  
812 Pandemic: Lessons From Hydroxychloroquine for Vaccine Authorization and  
813 Approval. *JAMA.* 2020; 324(13):1282–1283. doi:10.1001/jama.2020.16253.

814 **21.** U.S Food & Drug Administration. FDA cautions against use of hydroxychloroquine or  
815 chloroquine for COVID-19 outside of the hospital setting or a clinical trial due to risk of heart  
816 rhythm problems. [Internet]. Food and Drug Administration. 2020 Jul 1 [cited 2020 Nov 27]

817 Available from: [https://www.fda.gov/drugs/drug-safety-and-availability/fda-cautions-against-](https://www.fda.gov/drugs/drug-safety-and-availability/fda-cautions-against-use-hydroxychloroquine-or-chloroquine-covid-19-outside-hospital-setting-or)  
818 [use-hydroxychloroquine-or-chloroquine-covid-19-outside-hospital-setting-or](https://www.fda.gov/drugs/drug-safety-and-availability/fda-cautions-against-use-hydroxychloroquine-or-chloroquine-covid-19-outside-hospital-setting-or) .

819 **22.** Recovery. No clinical benefit from use of hydroxychloroquine in hospitalized patients with  
820 COVID-19. [Internet]. Recovery 2020 June 5 [cited 2020 Nov 27] Available from:  
821 [https://www.recoverytrial.net/news/statement-from-the-chief-investigators-of-the-](https://www.recoverytrial.net/news/statement-from-the-chief-investigators-of-the-randomised-evaluation-of-covid-19-therapy-recovery-trial-on-hydroxychloroquine-5-june-2020-no-clinical-benefit-from-use-of-hydroxychloroquine-in-hospitalised-patients-with-covid-19)  
822 [randomised-evaluation-of-covid-19-therapy-recovery-trial-on-hydroxychloroquine-5-june-2020-](https://www.recoverytrial.net/news/statement-from-the-chief-investigators-of-the-randomised-evaluation-of-covid-19-therapy-recovery-trial-on-hydroxychloroquine-5-june-2020-no-clinical-benefit-from-use-of-hydroxychloroquine-in-hospitalised-patients-with-covid-19)  
823 [no-clinical-benefit-from-use-of-hydroxychloroquine-in-hospitalised-patients-with-covid-19](https://www.recoverytrial.net/news/statement-from-the-chief-investigators-of-the-randomised-evaluation-of-covid-19-therapy-recovery-trial-on-hydroxychloroquine-5-june-2020-no-clinical-benefit-from-use-of-hydroxychloroquine-in-hospitalised-patients-with-covid-19) .

824 **23.** Naveed M, Uddin S, Abdullah KS, Ishaq SE, Ahmad T. Various Evidence-Based Hypothetical  
825 and Experimental Treatment Approaches and Their Effectiveness against COVID-19 Worldwide:  
826 A Comprehensive Literature Review. *EJMO* 2020; 4(4):265–285. doi:  
827 10.14744/ejmo.2020.52538

828 **24.** Chu C M, Cheng VCC, Hung IFN, Wong MML, Chan KH, Chan KS, et.al. Role of  
829 lopinavir/ritonavir in the treatment of SARS: initial virological and clinical findings. *Thorax*.  
830 2004; 59(3):252-256. doi:10.1136/thorax.2003.012658

831 **25.** Cao B, Wang Y, Wen D, Liu W, Wang J, Fan G, et al. A trial of lopinavir-ritonavir in adults  
832 hospitalized with severe covid-19. *N. Engl . J. Med.* 2020; 382(19): 1787-1799.  
833 doi:10.1056/NEJMoa2001282

834 **26.** Vosu J, Britton P, Howard-Jones A, Isaacs D, Kesson A, Khatami A, et al. Is the risk of  
835 ibuprofen or other non-steroidal anti-inflammatory drugs increased in COVID-19?. *J Paediatr*  
836 *Child Health.* 2020; 56(10): 1645-1646. doi:10.1111/jpc.15159

837 **27.** Fang L, Karakiulakis G, Roth M. Are patients with hypertension and diabetes mellitus at  
838 increased risk for COVID-19 infection? *Lancet Respir Med.* 2020; 8(4):e21.8 doi:10.1016/S2213-  
839 2600(20)30116-8

840 **28.** Science alert. Updated: WHO Now Doesn't Recommend Avoiding Ibuprofen For COVID-19  
841 Symptoms [Internet]. Science alert 2020 Mar 17 [cited 2020 Nov 27]. Available from:  
842 [https://www.sciencealert.com/who-recommends-to-avoid-taking-ibuprofen-for-covid-19-](https://www.sciencealert.com/who-recommends-to-avoid-taking-ibuprofen-for-covid-19-symptoms)  
843 [symptoms](https://www.sciencealert.com/who-recommends-to-avoid-taking-ibuprofen-for-covid-19-symptoms)

844 **29.** Esba LCA, Alqahtani RA, Thomas A, Shamas N, Alswaidan L, Mardawi G. Ibuprofen and  
845 NSAID Use in COVID-19 Infected Patients Is Not Associated with Worse Outcomes: A  
846 Prospective Cohort Study. *Infect Dis Ther.* 2020; 1-16. doi:10.1007/s40121-020-00363-w

847 **30.** Rinott E, Kozer E, Shapira Y, Bar-Haim A, Youngster I. Ibuprofen use and clinical outcomes in  
848 COVID-19 patients. *Clin Microbiol Infect.* 2020; 26(9):1259.e5-1259.e7.  
849 doi:10.1016/j.cmi.2020.06.003

850 **31.** Roberts M. Coronavirus: Dexamethasone proves first life-saving drug. [Internet]. British  
851 Broadcasting Corporation 2020 June 16 [cited 2020 Nov 27] Available from:  
852 <https://www.bbc.com/news/health-53061281>.

853 **32.** Horby P, Lim WS, Emberson JR, Mafham M, Bell JL, Linsell L, et al.. Dexamethasone in  
854 hospitalized patients with Covid-19-preliminary report. *N. Engl. J. Med.* 2020.  
855 doi:10.1056/nejmoa2021436

856 **33.** Lu CC, Chen MY, Lee WS, Chang YL. Potential therapeutic agents against COVID-19: What we  
857 know so far. *J Chin Med Assoc.* 2020; 83(6):534-536. doi: 10.1097/JCMA.0000000000000318



858 **34.** Wang Y, Zhang D, Du G, Du R, Zhao J, Jin Y, et al. Remdesivir in adults with severe COVID-19:  
859 a randomised, double-blind, placebo-controlled, multicentre trial. *The Lancet*. 2020;  
860 395(10236):1569-1578. doi:10.1016/S0140-6736(20)31022-9

861 **35.** Beigel JH, Tomashek KM, Dodd LE, Mehta AK, Zingman BS, Kalil AC. et al. Remdesivir for the  
862 treatment of Covid-19. *N. Engl. J. Med.* 2020.  
863 <https://www.nejm.org/doi/10.1056/NEJMoa2007764>

864 **36.** U.S Food and Drug Administration. FDA Approves First Treatment for COVID-19 [Internet].  
865 Food and Drug Administration 2020 Oct 22 [cited 2020 Nov 27] Available from:  
866 [https://www.fda.gov/news-events/press-announcements/fda-approves-first-treatment-covid-](https://www.fda.gov/news-events/press-announcements/fda-approves-first-treatment-covid-19)  
867 [19](https://www.fda.gov/news-events/press-announcements/fda-approves-first-treatment-covid-19).

868 **37.** U.S Food and Drug Administration. Coronavirus (COVID-19) Update: November 20, 2020  
869 [Internet]. Food and Drug Administration 2020 Nov 20 [cited 2020 Nov 27] Available from:  
870 [https://www.fda.gov/news-events/press-announcements/coronavirus-covid-19-update-](https://www.fda.gov/news-events/press-announcements/coronavirus-covid-19-update-november-20-2020)  
871 [november-20-2020](https://www.fda.gov/news-events/press-announcements/coronavirus-covid-19-update-november-20-2020).

872 **38.** Glasdam S, Stjernswärd S. Information about the COVID-19 pandemic—a thematic analysis of  
873 different ways of perceiving true and untrue information. *SSHOP*. 2020; (2)1: 100090.  
874 <https://doi.org/10.1016/j.ssaho.2020.100090>

875 **39.** Caleb TC, Hayes RA. Social Media: Defining, Developing, and Divining. *Atl J Commun*.2015;  
876 23:1: 46-65. <https://doi.org/10.1080/15456870.2015.972282>

877 **40.** Boyd DM, Ellison NB.Social network sites: Definition, history, and scholarship. *J Comput*  
878 *Mediat Commun*. 2007; 13(1): 210-230. <https://doi.org/10.1111/j.1083-6101.2007.00393.x>

- 879 **41.** Reuter C, Stieglitz S, Imran M. Social media in conflicts and crises *Behav. Inf. Technol.*  
880 2020; 39(3): 241-251. <https://doi.org/10.1080/0144929X.2019.1629025>
- 881 **42.** Vasconcellos-Silva PR, Castiel LD. COVID-19, fake news, and the sleep of communicative  
882 reason producing monsters: the narrative of risks and the risks of narratives. *Cad Saude Publica.*  
883 2020); 36(7): e00101920. <https://doi.org/10.1590/0102-311x00101920>
- 884 **43.** Pulido CM, Ruiz-Eugeni L, Redondo-Sama G, Villarejo-Carballido B. A New Application of  
885 Social Impact in Social Media for Overcoming Fake News in Health. *Int. J. Environ. Res. Public*  
886 *Health.* 2020; 17(7):2430. <https://doi.org/10.3390/ijerph17072430>
- 887 **44.** Al-Dmour H, Salman A, Abuhashesh M, Al-Dmour R. Influence of social media platforms on  
888 public health protection against the COVID-19 pandemic via the mediating effects of public  
889 health awareness and behavioral changes: integrated model. *J. Medical Internet Res.*  
890 2020; 22(8):e19996.
- 891 **45.** Wong JEL, Leo YS, Tan CC. COVID-19 in Singapore—Current Experience: Critical Global Issues  
892 That Require Attention and Action. *JAMA.* 2020; 323(13):1243–  
893 1244. doi:10.1001/jama.2020.2467
- 894 **46.** Lazer DM, Baum MA, Benkler Y, Berinsky AJ, Greenhill KM, Menczer F, et al. The science of  
895 fake news. *Science.* 2018; 359(6380):1094-1096. DOI: 10.1126/science.aao2998
- 896 **47.** Moscadelli A, Albora G, Biamonte MA, Giorgetti D, Innocenzio M, Paoli S, et al. Fake News  
897 and Covid-19 in Italy: Results of a Quantitative Observational Study. *Int. J. Environ. Res. Public*  
898 *Health.* 2020; 17:5850
- 899 **48.** Mian A, Khan S. Coronavirus: The spread of misinformation. *BMC Medicine.* 2020; 18(1):1-2  
900 doi:10.1186/s12916-020-01556-3 \

901 **49.** Pan American Health Organization. Understanding the infodemic and misinformation in the  
902 fight against covid-19. [Internet]. Pan American Health Organization 2020 May 1 [cited 2020  
903 Nov 27] Available from: [https://www.paho.org/en/documents/understanding-infodemic-and-](https://www.paho.org/en/documents/understanding-infodemic-and-misinformation-fight-against-covid-19)  
904 [misinformation-fight-against-covid-19](https://www.paho.org/en/documents/understanding-infodemic-and-misinformation-fight-against-covid-19).

905 **50.** Bowles J, Larreguy H, Liu, S. Countering misinformation via WhatsApp: Preliminary evidence  
906 from the COVID-19 pandemic in Zimbabwe. *PloS one*. 2020; 15(10): e0240005.  
907 <https://doi.org/10.1371/journal.pone.0240005>

908 **51.** Ittefaq M, Hussain SA, Fatima M. COVID-19 and social-politics of medical misinformation on  
909 social media in Pakistan. *Media Asia*. 2020; 47(1-2): 75-80.  
910 <https://doi.org/10.1080/01296612.2020.1817264>

911 **52.** The National Law Review. There's a Fake News Pandemic. Could COVID-19 and Trademarks  
912 be the Cure? [Internet]. The National Law Review 2020 Jul 7 [cited 2020 Nov 27] Available from:  
913 [https://www.natlawreview.com/article/there-s-fake-news-pandemic-could-covid-19-and-](https://www.natlawreview.com/article/there-s-fake-news-pandemic-could-covid-19-and-trademarks-be-cure)  
914 [trademarks-be-cure](https://www.natlawreview.com/article/there-s-fake-news-pandemic-could-covid-19-and-trademarks-be-cure)

915 **53.** O'connor C, Murphy M. Going Viral: Doctors Must Combat Fake News in the Fight against  
916 Covid-19. *Ir Med J*. 2020; 113(5): 85-85.

917 **54.** Pew Research Center. Nearly three-in-ten Americans believe COVID-19 was made in a lab.  
918 [Internet]. Pew research center 2020 April 8 [cited 2020 Nov 27] Available from:  
919 [https://www.pewresearch.org/fact-tank/2020/04/08/nearly-three-in-ten-americans-believe-](https://www.pewresearch.org/fact-tank/2020/04/08/nearly-three-in-ten-americans-believe-covid-19-was-made-in-a-lab/)  
920 [covid-19-was-made-in-a-lab/](https://www.pewresearch.org/fact-tank/2020/04/08/nearly-three-in-ten-americans-believe-covid-19-was-made-in-a-lab/)

921 **55.** Health Analytics Asia. 50 Fake ‘frequently forwarded’ COVID-19 WhatsApp messages.  
922 [Internet]. Health Analytics Asia 2020 April 2 [cited 2020 Nov 27] Available from:  
923 <https://www.ha-asia.com/50-fake-frequently-forwarded-covid-19-whatsapp-messages/>

924 **56.** Brennen JS, Simon F, Howard PN, Nielsen RK. Types, sources, and claims of COVID-19  
925 misinformation. *Reuters Institute*. 2020; 7: 1-13.

926 **57.** Pennycook G, McPhetres J, Zhang Y, Lu JG, Rand DG. Fighting COVID-19 misinformation on  
927 social media: Experimental evidence for a scalable accuracy-nudge intervention. *Psychol*.  
928 2020; 31(7): 770-780. <https://doi.org/10.1177/0956797620939054>

929 **58.** Barua Z, Barua S, Aktar S, Kabir N, Li M. Effects of misinformation on COVID-19 individual  
930 responses and recommendations for resilience of disastrous consequences of  
931 misinformation. *Prog Disaster Science*. 2020; 8: 100119. doi:10.1016/j.pdisas.2020.100119

932 **59.** Ahmed N, Shahbaz T, Shamim A, Khan KS, Hussain SM, Usman A. The COVID-19 Infodemic:  
933 A Quantitative Analysis Through Facebook. *Cureus*. 2020; 12(11): e11346. doi:  
934 10.7759/cureus.11346

935 **60.** Nagler RH, Vogel RI, Gollust SE, Rothman AJ, Fowler EF, Yzer MC. Public perceptions of  
936 conflicting information surrounding COVID-19: Results from a nationally representative survey  
937 of US adults. *PLoS one*. 2020; 15(10): e0240776. doi:10.1371/journal.pone.0240776

938 **61.** Orso D, Federici N, Copetti R, Vetrugno L, Bove T. Infodemic and the spread of fake news in  
939 the COVID-19-era. *Eur J Emerg Med*. 2020; 27(5):327-328. doi:10.1097/MEJ.0000000000000713

940 **62.** McNab C. What social media offers to health professionals and citizens. *Bull World Health*  
941 *Organ*. 2009; 87(8):566. doi:10.2471/blt.09.066712

- 942 **63.** Ma X, Vervoort D, Luc JG. When misinformation goes viral: access to evidence-based  
943 information in the COVID-19 pandemic. *J. Glob. Health. Sci.* 2020; 2(1):e13  
944 doi:10.35500/jghs.2020.2.e13
- 945 **64.** Tasnim S, Hossain MM, Mazumder H. Impact of rumors and misinformation on COVID-19 in  
946 social media. *J Prev Med Public Health.* 2020; 53(3):171-174.
- 947 **65.** Bode L, Vraga EK. See something, say something: Correction of global health misinformation  
948 on social media. *J Health Commu.* 2018; 33(9):1131-1140.  
949 doi:10.1080/10410236.2017.1331312
- 950 **66.** Chou WYS, Oh A, Klein WM. Addressing health-related misinformation on social  
951 media. *Jama.* 2018; 320(23): 2417-2418. doi:10.1001/jama.2018.16865.
- 952 **67.** Stasiuk K, Polak M, Dolinski D, Maciuszek J. The credibility of health information sources as  
953 predictors of attitudes toward vaccination—the results from a longitudinal study in  
954 Poland. *Vaccines.* 2021; 9(8):933 doi: 10.3390/vaccines9080933
- 955 **68.** Cernicova-Buca M, Palea A. An appraisal of communication practices demonstrated by  
956 romanian district public health authorities at the outbreak of the COVID-19  
957 pandemic. *Sustainability.* 2021; 13(5): 1-19, doi: 10.3390/su13052500
- 958 **69.** Tagliacozzo S, Albrecht F, Ganapati NE. International Perspectives on COVID-19  
959 Communication Ecologies: Public Health Agencies' Online Communication in Italy, Sweden, and  
960 the United States. *Am Behav Sci.* 2021; 65(7), 934-955 doi: 10.1177/0002764221992832
- 961 **70.** Saechang O, Yu J, Li Y. Public trust and policy compliance during the COVID-19 pandemic:  
962 The role of professional trust. *Healthcare.* 2021; 9 (2):1-13 doi: 10.3390/healthcare9020151.

- 963 **71.** Lewandowski R, Goncharuk AG, Cirella GT. Restoring patient trust in healthcare: medical  
964 information impact case study in Poland. *BMC Health Serv. Res.* 2021; 21(1):1-11 doi:  
965 10.1186/s12913-021-06879-2
- 966 **72.** Soveri A, Karlsson LC, Antfolk J, Lindfelt M, Lewandowsky S. Unwillingness to engage in  
967 behaviors that protect against COVID-19: the role of conspiracy beliefs, trust, and endorsement  
968 of complementary and alternative medicine. *BMC Public Health.* 2021; 21(1): 1-12 doi:  
969 10.1186/s12889-021-10643-w
- 970 **73.** Antinyan A, Bassetti T, Corazzini L, Pavesi F. Trust in the health system and COVID-19  
971 treatment. *Front. Psychol.* 2021; 12:1-14 doi:10.3389/fpsyg.2021.643758
- 972 **74.** Law RW, Kanagasingam S, Choong KA. Sensationalist social media usage by doctors and  
973 dentists during Covid-19. *Digit. Health.* 2021; 7:1-12 doi: 10.1177/20552076211028034
- 974 **75.** Leonard MB, Pursley DM, Robinson LA, Abman SH, Davis JM. The importance of  
975 trustworthiness: lessons from the COVID-19 pandemic. *Pediatr. Res.* 2021; 1-4  
976 doi:10.1038/s41390-021-01866-z
- 977 **76.** Wood JL, Lee GY, Stinnett SS, Southwell BG. A Pilot Study of Medical Misinformation  
978 Perceptions and Training Among Practitioners in North Carolina (USA). *INQUIRY: The Journal of*  
979 *Health Care Organization, Provision, and Financing,* 2021; 58:1-6 doi:  
980 10.1177/00469580211035742
- 981 **77.** Gopichandran V, Sakthivel K. Doctor-patient communication and trust in doctors during  
982 COVID 19 times—A cross sectional study in Chennai, India. *Plos One.* 2021: 16(6), 1-11 doi:  
983 10.1371/journal.pone.0253497

- 984 **78.** Nwoga HO, Ajuba, MO, Ezeoke UE. Effect of COVID-19 on doctor-patient relationship. *Int J*  
985 *Community Med Public Health.* 2020; 7(12): 2394-6040, doi: 10.18203/2394-  
986 6040.ijcmph20205136
- 987 **79.** Rocha YM, de Moura GA, Desidério GA, de Oliveira CH, Lourenço FD, de Figueiredo NLD. The  
988 impact of fake news on social media and its influence on health during the COVID-19 pandemic:  
989 A systematic review. *J. Public Health.* 2021; 1-10 doi:10.1007/s10389-021-01658-z
- 990 **80.** Greene CM, Murphy G. Quantifying the effects of fake news on behavior: Evidence from a  
991 study of COVID-19 misinformation. *J Exp Psychol Appl.* 2021 Dec;27(4):773-784. doi:  
992 10.1037/xap0000371.
- 993 **81.** Rogozea LM, Sechel G, Bularca MC, Coman C, Cocuz ME. Who's Getting Shots First? Dealing  
994 With the Ethical Responsibility for Prioritizing Population Groups in Vaccination. *Am J Ther.*  
995 2021 Jun 22;28(4):e478-e487. doi: 10.1097/MJT.0000000000001400. PMID: 34228653.
- 996 **82.** Rogozea L, Purcaru D, Leașu F, Nemet C. Biomedical research - opportunities and ethical  
997 challenges. *Rom J Morphol Embryol.* 2014;55(2 Suppl):719-22. PMID: 25178352.
- 998 **83.** Olimid AP, Rogozea LM, Olimid DA. Ethical approach to the genetic, biometric and health  
999 data protection and processing in the new EU General Data Protection Regulation (2018). *Rom J*  
1000 *Morphol Embryol.* 2018;59(2):631-636. PMID: 30173275.

## 1001 **Supporting information**

- 1002 S1 Appendix English version of the questionnaire  
1003 (docx)
- 1004 S2 Appendix Romanian version of the questionnaire  
1005 (docx)
