# Supplementary material for: Misinformation about medication during the COVID– 19 pandemic: A perspective of medical staff
Source: PubMed Central journal article supplement (PMC9612566; doi:10.1371/journal.pone.0276693), 2022-10-27
Supplement: pone.0276693.s009.pdf [file pone.0276693.s009.pdf]

# PLOS ONE

## Challenges in the communication process during the COVID-19 pandemic- a perspective of medical staff --Manuscript Draft--

|                               |                                                                                                                                                                                                                                                                                                                                                                                                                                                                                                                                                                                                                                                                                                                                                                                                                                                                                                                                                                                                                                                                                                                                                                                                                                                                                                                                                                                                                                                                                                                                                                                                                                                                                                                                                                                                                                                                                                                                                                                                                                                                                                                                                                 |
|-------------------------------|-----------------------------------------------------------------------------------------------------------------------------------------------------------------------------------------------------------------------------------------------------------------------------------------------------------------------------------------------------------------------------------------------------------------------------------------------------------------------------------------------------------------------------------------------------------------------------------------------------------------------------------------------------------------------------------------------------------------------------------------------------------------------------------------------------------------------------------------------------------------------------------------------------------------------------------------------------------------------------------------------------------------------------------------------------------------------------------------------------------------------------------------------------------------------------------------------------------------------------------------------------------------------------------------------------------------------------------------------------------------------------------------------------------------------------------------------------------------------------------------------------------------------------------------------------------------------------------------------------------------------------------------------------------------------------------------------------------------------------------------------------------------------------------------------------------------------------------------------------------------------------------------------------------------------------------------------------------------------------------------------------------------------------------------------------------------------------------------------------------------------------------------------------------------|
| <b>Manuscript Number:</b>     | PONE-D-22-09134R2                                                                                                                                                                                                                                                                                                                                                                                                                                                                                                                                                                                                                                                                                                                                                                                                                                                                                                                                                                                                                                                                                                                                                                                                                                                                                                                                                                                                                                                                                                                                                                                                                                                                                                                                                                                                                                                                                                                                                                                                                                                                                                                                               |
| <b>Article Type:</b>          | Research Article                                                                                                                                                                                                                                                                                                                                                                                                                                                                                                                                                                                                                                                                                                                                                                                                                                                                                                                                                                                                                                                                                                                                                                                                                                                                                                                                                                                                                                                                                                                                                                                                                                                                                                                                                                                                                                                                                                                                                                                                                                                                                                                                                |
| <b>Full Title:</b>            | Challenges in the communication process during the COVID-19 pandemic- a perspective of medical staff                                                                                                                                                                                                                                                                                                                                                                                                                                                                                                                                                                                                                                                                                                                                                                                                                                                                                                                                                                                                                                                                                                                                                                                                                                                                                                                                                                                                                                                                                                                                                                                                                                                                                                                                                                                                                                                                                                                                                                                                                                                            |
| <b>Short Title:</b>           | Challenges in the communication process during the COVID-19 pandemic                                                                                                                                                                                                                                                                                                                                                                                                                                                                                                                                                                                                                                                                                                                                                                                                                                                                                                                                                                                                                                                                                                                                                                                                                                                                                                                                                                                                                                                                                                                                                                                                                                                                                                                                                                                                                                                                                                                                                                                                                                                                                            |
| <b>Corresponding Author:</b>  | Claudiu Coman<br>Universitatea Transilvania din Brasov<br>Brasov, ROMANIA                                                                                                                                                                                                                                                                                                                                                                                                                                                                                                                                                                                                                                                                                                                                                                                                                                                                                                                                                                                                                                                                                                                                                                                                                                                                                                                                                                                                                                                                                                                                                                                                                                                                                                                                                                                                                                                                                                                                                                                                                                                                                       |
| <b>Keywords:</b>              | Miscommunication; healthcare professionals; trust; Covid - 19 pandemic                                                                                                                                                                                                                                                                                                                                                                                                                                                                                                                                                                                                                                                                                                                                                                                                                                                                                                                                                                                                                                                                                                                                                                                                                                                                                                                                                                                                                                                                                                                                                                                                                                                                                                                                                                                                                                                                                                                                                                                                                                                                                          |
| <b>Abstract:</b>              | <p>Background Healthcare professionals had to face numerous challenges during the pandemic, their professional activity being influenced not only by the virus, but also by the spread of medical misinformation. In this regard, we aimed to analyze, from the perspective of medical staff, the way medical and non - medical information about the virus was communicated during the pandemic in order to raise awareness about the way misinformation affected the medical staff. Methods and findings. The study was conducted on Romanian healthcare professionals including doctors, nurses and medical students. They were asked to answer to a questionnaire and the sample of the research includes 536 respondents. The findings revealed that most respondents stated that information about alternative treatments against the virus affected the credibility of health professionals, and that younger professionals believed to a greater extent that trust in doctors was affected. The research also showed that respondents were well informed about the drugs used in clinical trials in order to treat the virus, and that younger respondents believed that social media should be used to send official information. Among the main limitations of our study we mention the fact that we used only quantitative methods and the fact we focused only on Romanian healthcare professionals. Conclusions Healthcare professionals declared that the spread of misinformation regarding alternative treatments, affected their credibility and the relationship with their patients. Healthcare professionals had knowledge about the drugs used in clinical trials, and they acknowledged the role of social media in spreading medical misinformation. However, younger professionals also believed that social media could be used to share official information about the virus. A future research should focus on studying the opinion of Romanian and international doctors, it should use qualitative methods too and should address the issue of social media being an appropriate environment for sending official information.</p> |
| <b>Order of Authors:</b>      | <p>Claudiu Coman</p> <p>Maria Cristina Bularca</p> <p>Angela Repanovici</p> <p>Liliana Rogozea</p>                                                                                                                                                                                                                                                                                                                                                                                                                                                                                                                                                                                                                                                                                                                                                                                                                                                                                                                                                                                                                                                                                                                                                                                                                                                                                                                                                                                                                                                                                                                                                                                                                                                                                                                                                                                                                                                                                                                                                                                                                                                              |
| <b>Response to Reviewers:</b> | <p>*For a more proper view of our Response to reviewers, we kindly ask you to check the Word document entitled Response to reviewers.</p> <p>Dear Sir/Madam</p> <p>With this cover letter we submit the revised manuscript, initially entitled” Challenges in the communication process during the COVID-19 pandemic- a perspective of medical staff”, and after complying with the suggestions of the reviewers, entitled “Misinformation about medication during the COVID – 19 pandemic: a perspective of medical staff” by Claudiu Coman, Maria Cristina Bularca, Angela Repanovici and Liliana Rogozea for publication in PLOS ONE.</p> <p>We revised the manuscript according to the suggestions and recommendation made by the reviewers. We would like to thank the reviewers for taking time to review our paper and for providing such useful suggestions. We also thank the academic editor</p>                                                                                                                                                                                                                                                                                                                                                                                                                                                                                                                                                                                                                                                                                                                                                                                                                                                                                                                                                                                                                                                                                                                                                                                                                                                      |

for reviewing our paper. We tried to comply with all the suggestions and recommendations made by the reviewers, and in this letter, we describe the changes we made to the text according to the recommendations of the reviewers. Our manuscript needed major revisions. The changes were made while having active the "Track changes" function from Microsoft Word and the lines where the text was changed can be best viewed while having active the "All markup" option. Moreover, in order for our changes to be best seen, we will also provide in this cover letter, the lines from the revised manuscript with the "Track changes" function, and "All markup" option active. With regards to our response to Reviewer 1, the reviewer made a series of suggestions directly in the PDF version of our initial manuscript, but also provided a summary of those suggestions in the e-mail which was sent by the journal to the corresponding author. In this regard, we responded first to the comments highlighted in the summary from the e-mail, and then we responded to each point made by Reviewer 1 in the PDF version of our initial manuscript. Next, we responded to each point raised by Reviewer 2.

Our response to Reviewer 1:

We firstly thank the reviewer for taking time to review our manuscript and provide suggestions in order to improve it. We addressed all the suggestions made by the reviewer. When we describe how the text was changed, we also provide the lines where the text can be found in the revised manuscript with the option "Track changes" active. In this way, the changes can be viewed completely (the text we deleted, and the text we inserted). Next, we will firstly describe our answers to the comments which were summarized in the e-mail received by the corresponding author, and then we will present our responses to the comments made by the reviewer in the PDF version of our manuscript.

Reviewer 1 comments- as summarized in the email received by the corresponding author

Reviewer 1 point 1: the review comments attached. The required modifications can be summarized as following and the authors will find it in details in the attached file: the authors should review the journal guidelines and abide by it in manuscript preparation. Response 1: We are grateful to the reviewer for the suggestion. We reviewed the guidelines of PLOS ONE journal again and we made sure our manuscript is prepared in accordance to the author guidelines which can be found on the journal's official website. We also checked the pdf files entitled "Download sample title, author list, and affiliation page" and "Download sample manuscript body", in order to make sure our manuscript is correctly formatted. Thus, we looked again at the guidelines for the sections which have to be included in the manuscript, the font and sizes for headings, table captions, referencing rules, etc., and we made sure our manuscript respects the guidelines of the journal.

Reviewer 1 point 2: the introduction section is too long and need to be summarized.

Response 2: We thank the reviewer for the useful suggestion. In order to comply with it, we tried to summarize our introduction. Thus, we would like to mention that we also took into account the comments the reviewer made in the pdf version of the manuscript. In this regard, there the reviewer recommended us to rephrase the first paragraph of our paper because the paragraph was not about the communication process: "the introductory paragraph is not related to communication process". We rephrased the paragraph and we added information in which we highlighted the fact that the COVID – 19 pandemic negatively influenced the communication process. The changes we made, the text deleted, added or rephrased can be best seen while having active the "Track changes" function and the "All markup" option provided by Microsoft Word. Thus, in the Introduction section of the paragraph, page 4 of the manuscript, lines 71-77, we made changes to the text, and the new introductory paragraph also addresses the subject of communication:

"The COVID 19 pandemic generated multiple changes in the way today's society members carry out their daily activities. One of the processes which was mostly affected by the pandemic was the communication process between institutions and the public, as well as between individuals. In this regard, from this perspective, while many domains were affected by the spread of the virus, such as the educational system or the cultural sector, the health sector was the one that faced the most challenges [1]." Next, in the pdf version of our manuscript, the reviewer suggested that the details we gave regarding the virus could be summarized in one paragraph: "the history of covid-19 can be summarized in a single paragraph". In order to comply with the request, in

the Introduction section, at page 4 of the manuscript, we summarized the text indicated by the reviewer.

The text the reviewer suggested us to summarize:

“Caused by severe acute respiratory syndrome coronavirus 2 (SARS-CoV-2) [2], the disease was firstly detected in December 2019, in Wuhan, China [3], and it fastly spread all over the world. The World Health Organization was informed about a pneumonia outbreak in Wuhan on December 31 2019, the number of cases continued to increase, and on March 11 2020 the World Health Organization characterized COVID 19 as a pandemic [4]. Being highly contagious, the virus affected a large number of people, and as of November 27 over 61 million cases were reported [5]. Even though many companies and institutions are struggling to develop a vaccine, Pfizer, Gamaleya Research Institute, University of Oxford, and a preliminary analysis of the vaccine proposed by Pfizer showed that the vaccine is able to prevent more than 90% of people from getting infected with COVID 19 [6], so far no vaccine was approved as a general and universal vaccine against COVID 19 [7]. Ever since the pandemic was declared, finding the right treatment for the virus has become a priority for researchers and doctors from all over the world. In this regard, large number of trials started to be conducted, and in order to find an efficient drug treatment against the virus, one method that was adopted was testing and administrating to patients, drugs that were previously used for curing other viruses [8]. Thus, on March 20 2020, The World Health Organization launched the SOLIDARITY clinical trial, a trial that monitored the effects on patients infected with COVID 19, of specific drugs that proven to be effective in the treatment of other diseases: remdesivir, interferon beta, chloroquine and hydroxychloroquine -previously used for Malaria, as well as drugs used on HIV patients: lopinavir and ritonavir [9]. However, according to the interim results published on October 15 2020 by WHO, even though those drugs were taught to have positive effects on treating COVID 19, they had little influence or no influence at all on mortality in general, on the need and initiation of ventilation and on the recovery process [10].”

The way we summarized the text can be seen at lines 102-114- in the revised version of our manuscript (The full change, the text deleted and the text summarizes is visible at lines 78-114).

The text we summarized (lines 102 -114 with the “Track changes” and “All Markup” option active:

“Caused by severe acute respiratory syndrome coronavirus 2 [2], the disease was firstly detected in December 2019, in Wuhan, China [3]. Due to the evolution of the virus, the World Health Organization declared the pandemic in March 2020 [4], and as of November 27 over 61 million cases were reported [5]. In this regard, although several companies are struggling to develop a vaccine, and some of the proposed vaccines showed promising results [6], so far no vaccine was approved in order to be administrated to the entire population [7]. Ever since the pandemic was declared, many companies started to be preoccupied with finding a treatment, and one method used that was adopted was administrating to patients, drugs that were previously used for curing other viruses [8]. Thus, one of the most well - known trials started was the SOLIDARITY trial, which focused on using various drugs including chloroquine and hydroxychloroquine, lopinavir or ritonavir [9]. However, even if those drugs were taught to have positive effects on treating the virus, they did not have a significant influence on preventing mortality in general [10].”

Next, in order to reduce the information written in the Introduction section, as the reviewer suggested, we also deleted the last paragraph of the Introduction section, paragraph in which we provided details about the concepts that we addressed next in the Literature review section. Thus, at lines 118 – 122 in the revised manuscript with “Track changes” and “All Markup” option active, we deleted the following text:

“Hence, considering the purpose of our paper and the research questions, we believed it was necessary to analyze the literature on the drugs used to treat COVID – 19, on the role of social media platforms in spreading fake information about the virus and potential treatments, and on the way the pandemic influenced the credibility of doctors and their relationship with their patients.”

Reviewer 1 point 3: the section titles need to be reviewed and fixed.

Response 3: We thank the reviewer for the useful suggestion. We checked again the author guidelines provided by the journal on its official website, regarding sections of the manuscript. In this regard, we corrected the section which was entitled “Methods and materials” in the initial version of our manuscript, with the correct form, which is

“Materials and methods”. The change can be seen in the revised manuscript at page 17, line 364, while having active the “Track changes” and “All markup” options from Microsoft Word. We reviewed all of our section titles and made sure they are correct. Reviewer 1 point 4: the results section include too much tables need to be focusing on the most significant tables and attach the other tables as supplementary tables. Response 4: We are grateful to the reviewer for such useful suggestion. We addressed the suggestion, we looked at the tables included in the Results section and we integrated in the section only the most significant tables. The other tables were deleted from the text and added to supplementary information. Thus, we created Word documents with supplementary information for each of our research questions. In this regard in S3\_Tables with results to the 1st research question we included Table 2 ; in S4\_Tables with results to the 2nd research question we included Table 5 and Table 6; in S5\_Tables with results to the 3rd research question we included Table 7 and Table 9; in S6\_Tables with results to the 4th research question we included Table 11 and Table 12; in S7\_Tables with results to the 5th research question we included Table 15 and Table 16.

Reviewer 1 point 5: the methods section is missing the research design, sampling method and the calculation of the study sample and the validity and reliability section. Response 5: We are very grateful to the reviewer for suggesting us to improve the methods section of our paper. With regards to the research design section, we added this section to our manuscript and we explained in detail the research design. Even more, we deleted some information from the Sampling and data collection procedures and we added it to the research design section because it was more suitable there. In this regard, at pages 17-18 of the manuscript, between lines 365- 385 can be found the Research design section of our paper, which comprises the following text:

“The present study was conducted on Romanian healthcare professionals including doctors, nurses and medical students. The method used is quantitative. The questionnaire was administrated online, the data was collected through the help of Google forms, and was disseminated on groups of healthcare professionals and students on platforms such as Facebook and WhatsApp, during the period April 2021– June 2021. The data we collected was firstly exported to Microsoft Excel, and then it was analyzed with IBM Statistical Package for the Social Sciences, version 20. The respondents were informed about the purpose of the study, about the fact that they were allowed to withdraw at any time, and they were asked to give their consent for participating in the study. The average time needed to complete the questionnaire was 15 minutes. Considering the validity of our research, we took into account the theoretical information from the literature regarding the development of a questionnaire. Our team of researchers together with health specialists have configured the dimensions, and operationalized the concepts in accordance with the theoretical approaches identified at the current stage of the research. Even more, we pre-tested the questionnaire before disseminating in order to guarantee the validity of the instrument. Thus, the questionnaire was completed by 50 respondents in the pre-testing stage. Considering the reliability of the research, we used split half reliability method. We split our sample in half, and we checked the variables in from our sub-samples in order to see if the variables provided convergent results. The convergent results we obtained by applying the split half method showed that we obtained a high fidelity measurement.

In order to create the research design section and to also improve the way our paper is structured, we made changes to the section “Sampling and data collection procedures”. In this regard, we deleted some text and we reformulated some phrases. The section comprises the following text, which can be found at pages 17-18 of the revised manuscript with “Track changes” and “All markup” option active, lines 419-427: “In order to conduct the research we used a quantitative method while having as an instrument a questionnaire. The responses were collected online, with the help of Google forms, and the questionnaire was self – administrated. The research received approval from The Council of the Faculty of Sociology and Communication, approval request Nr.378/30.03.2021. Taking into account the sampling method and the calculation of the study sample, we used random, probabilistic sampling method. We took into consideration specialists, physicians, and medical students from Brasov, and we applied the snowballing method in order to disseminate the questionnaire. The sample of our study comprises 536 respondents, and included doctors, nurses as well as medical students from Romania.”

With regards to the sampling method, we would like to thank the reviewer for pointing out that we should give more information about the sampling procedure. Even though

in the initial version of our manuscript we described the sample of our research, how the questionnaire was distributed and to whom, we added more specific information about the sampling method. Hence, at page 20 of the manuscript, lines 423 - 426, we explained that we used a random, probabilistic sampling method:

“Taking into account the sampling method and the calculation of the study sample, we used random, probabilistic sampling method. We took into consideration specialists, physicians and medical students from Brasov, and we applied the snowballing method in order to disseminate the questionnaire.”

Reviewer 1 point 6: the conclusion section need to be summarized and conclude the main study findings and its significance.

Response 6: We are grateful to the reviewer for the suggestion. In order to comply with it we tried to summarize our Conclusions section, to highlight again the main findings of the research and the significance of our study. In this regard, the text which was written in Conclusions in the initial version of our manuscript was improved. In this regard, we deleted some of the redundant information which was written in this section. The information we deleted:

“In this regard, besides fighting the pandemic, physician also had to fight the so called infodemic. Fake news spread on social media about various alternative treatments for the virus and the opinions of certain professionals about treatment methods which later proven to be inaccurate negatively influenced the credibility of doctors.” (Lines 789-792)

“This results can suggest that while professionals were aware of the role of social media in spreading medical misinformation and in affecting trust in doctors, due to their knowledge, at personal level they were less affected by that type of information, many of them believing that social media should also be used for sending official information” (lines 803-807)

“Moreover, the medical staff was aware of the alternative treatments which were promoted on social media, the method of drinking alcohol in order to prevent the infection being the method that most of the respondents have heard about” (lines 811-813).

“Hence, on the basis of the findings and implications of the study, we further discuss limitations and future research directions.” (Lines 838-839).

Next, we took into account the recommendation of the reviewer and we started the section by presenting the main findings of our research. Since we had several research questions, we presented our main findings in relation to those research questions.

Next, the reviewer recommended us to explain the significance of our study. Thus, in the paper we had already written the theoretical and practical implication of our paper. In this regard, we did not delete the implications because we consider that the implications emphasize why the study conducted is important and how it can be further taken into consideration. Next, we did not delete the limitations and future research directions either, because we considered necessary to highlight how and why our study has limitations but also how it could be further developed or extended.

Reviewer 1 point 7: the references are too much need to be filtered and summarized to 30 or 40 references maximum. Regards

Response 7: We are very grateful to the reviewer for this recommendation and we appreciated the interest in improving our paper. However, when we started to write the article, we wanted to make sure our paper will be well documented and that it will address all the theoretical concepts and aspects needed. In this regard, we made a thorough research and literature review on the medication used in order to treat the virus, on the way social media contributed to the spread of misinformation about the virus, and on the way trust in doctors and the doctor- patient relation was affected during the pandemic. Thus, we read many research paper because we wanted for our paper to provide an overall view on the subject addressed. In this regard, we consider that all the references we used are relevant for the subject approached and for the research that we conducted, and therefore we could not delete more than half of them. In other words, through the references cited we support and sustain our arguments, we show how other researchers approached similar matters and thus we could not delete more than half of our references because we considered that by deleting them we could no longer have a strong and well consolidated theoretical background and we could not properly explain how we wanted to address the matted of medical misinformation and its effects from the perspective of medical staff. Even more, the journal does not have a limitation regarding the length of the article or the number of references: “Manuscripts can be any length. There are no restrictions on word count, number of figures, or amount of supporting information”. In addition, we have seen



articles which addressed subjects related to health and the COVID – 19 pandemic, and which were published in PLOS ONE, that have more than 40 references. For example, one article entitled “Severity of infection with the SARS- CoV -2 B1.1.7 lineage among hospitalized COVID – 19 patients in Belgium”

(<https://journals.plos.org/plosone/article?id=10.1371/journal.pone.0269138>), has 76 references, and another article, entitled “The coronavirus disease 2019 (COVID -19) vaccination psychological antecedent assessment using the ARABIC 5c validated tool: An online survey in 13 Arab countries” (<https://journals.plos.org/plosone/article?id=10.1371/journal.pone.0260321>) has 71 references.

Reviewer 1 comments- as pointed by the reviewer in the PDF version of our manuscript

Reviewer 1 point 1: A perspective of medical staff

Response 1: We thank the reviewer for the suggestion. We put “:” instead of “-“in our title, before the phrase “a perspective of medical staff”. The change can be seen at line 2 of the revised manuscript.

Reviewer 1 point 2: the abstract need to be summarized to 250 to 300 words by the main important information in each part ...it is recommended to avoid long paragraphs and to paraphrase and summarize the ideas in short paragraphs.

Response 2: We are grateful to the reviewer for the recommendation. In order to comply with it we summarized our abstract to 219 words. In this regard, we deleted the text which was written in the Abstract section, and instead, at page 3 of the revised manuscript with “Track changes” and “All markup” option on, at lines 50 –68 we inserted the following text:

“Background. Healthcare professionals had to face numerous challenges during the pandemic, their professional activity being influenced not only by the virus, but also by the spread of medical misinformation. In this regard, we aimed to analyze, from the perspective of medical staff, the way medical and non - medical information about the virus was communicated during the pandemic in order to raise awareness about the way misinformation affected the medical staff.

Methods and findings. The study was conducted on Romanian healthcare professionals. They were asked to answer to a questionnaire and the sample of the research includes 536 respondents. The findings revealed that most respondents stated that information about alternative treatments against the virus affected the credibility of health professionals, and that younger professionals believed to a greater extent that trust in doctors was affected. The research also showed that respondents were well informed about the drugs used in clinical trials in order to treat the virus.

Conclusions. Healthcare professionals declared that the spread of misinformation regarding alternative treatments, affected their credibility and the relationship with their patients. Healthcare professionals had knowledge about the drugs used in clinical trials, and they acknowledged the role of social media in spreading medical misinformation. However, younger professionals also believed that social media could be used to share official information about the virus.”

Reviewer 1 point 3: the introductory paragraph is not related to communication process.

Response 3: We thank the reviewer for pointing this out. We explained how we addressed this point above in this Cover letter, in point 2 raised by the reviewer in the summary which was written in the e-mail sent to the corresponding author. However, we will present again the way we changed the introductory paragraph in order for it to be related to communication process. In this regards, in the Introduction section of the paragraph, page 4 of the manuscript with “Track changes” and “All markup active”, lines 71-77, we made changes to the text, and the new introductory paragraph also addresses the subject of communication:

“The COVID 19 pandemic generated multiple changes in the way today’s society members carry out their daily activities. One of the processes which was mostly affected by the pandemic was the communication process between institutions and the public, as well as between individuals. In this regard, from this perspective, while many domains were affected by the spread of the virus, such as the educational system or the cultural sector, the health sector was the one that faced the most challenges [1].”

Reviewer 1 point 4: the history of covid-19 can be summarized in a single paragraph.

Response 4: We are very grateful to the reviewer for the recommendation. We tried to comply with it and we summarized the history of COVID -19. Earlier in this cover letter we explained how we addressed this point because the reviewer also mentioned it in

the summary which was written in the e-mail sent to the corresponding author. In this regard, we summarized the indicated text, and at page 5 of the manuscript with “Track changes” and “All markup” option active, lines 102- 114 we added the following text: “Caused by severe acute respiratory syndrome coronavirus 2 [2], the disease was firstly detected in December 2019, in Wuhan, China [3]. Due to the evolution of the virus, the World Health Organization declared the pandemic in March 2020 [4], and as of November 27 over 61 million cases were reported [5]. In this regard, although several companies are struggling to develop a vaccine, and some of the proposed vaccines showed promising results [6], so far no vaccine was approved in order to be administrated to the entire population [7]. Ever since the pandemic was declared, many companies started to be preoccupied with finding a treatment, and one method used that was adopted was administrating to patients, drugs that were previously used for curing other viruses [8]. Thus, one of the most well - known trials started was the SOLIDARITY trial, which focused on using various drugs including chloroquine and hydroxychloroquine, lopinavir or ritonavir [9]. However, even if those drugs were taught to have positive effects on treating the virus, they did not have a significant influence on preventing mortality in general [10]”.

Reviewer 1 point 5: the study aim is to assess the perception and this other aim is not included as an intervention, so it is better to rephrased as to recommend future researches or interventions to raise.....

Response 5: We thank the reviewer for the useful suggestion. We tried our best in addressing the recommendation. In this regard, we rephrased the part of the purpose indicated by the reviewer. In other words, the reviewer suggested us to rephrase the last part of our purpose, to rephrase the expression “in order to raise awareness about the way misinformation affected medical staff”. Hence, at page 6 of the manuscript with “Track changes” and “All Markup” option active, lines 129 –133 we rephrased the purpose and added the following text:

“The purpose of the paper is to analyze, from the perspective of medical staff, the way medical and non - medical information about the virus was communicated during the pandemic to encourage the development of future research or interventions in order to raise awareness about the way misinformation affected medical staff.”

Due to the suggestion of the reviewer, we had to change the way we described the purpose of our paper in other sections of our manuscript too. Thus, the purpose of the paper was changed in the way recommended by the reviewer, also at lines: 52 -55 (in the Abstract section).

Reviewer 1 point 6: please to consider the restructuring of the manuscript as per the journal guidelines and the title of each section. Also, the literature review section is very long and it should be fixed to be not more than 2 to 2 and half pages summarizing the main ideas.

Response 6: We are very grateful to the reviewer for suggesting us to check again the guidelines of the journal. As we previously explained in this Cover letter, (due to the fact that the same point was also highlighted by the reviewer in the summary which was written in the e-mail sent to the corresponding author), we checked again the guidelines and made sure our manuscript is formatted according to the guidelines. We also checked again the titles of the section which should be included in the manuscript, and at page 17 of the revised manuscript with “Track changes” and “All markup” option active, line 364 we changed “Methods and materials” to “Materials and methods”.

With regards to summarizing our Literature review and deleting references from our paper, we present again the explanation we gave earlier in the Cover letter, at point 7 made by the reviewer in the e-mail sent to the corresponding author:

We are very grateful to the reviewer for this recommendation and we appreciated the interest in improving our paper. However, when we started to write the article, we wanted to make sure our paper will be well documented and that it will address all the theoretical concepts and aspects needed. In this regard, we made a thorough research and literature review on the medication used in order to treat the virus, on the way social media contributed to the spread of misinformation about the virus, and on the way trust in doctors and the doctor- patient relation was affected during the pandemic. Thus, we read many research paper because we wanted for our paper to provide an overall view on the subject addressed. In this regard, we consider that all the references we used are relevant for the subject approached and for the research that we conducted, and therefore we could not delete more than half of them. In other words, through the references cited we support and sustain our arguments, we show how other researchers approached similar matters and thus we could not delete more

than half of our references because we considered that by deleting them we could no longer have a strong and well consolidated theoretical background and we could not properly explain how we wanted to address the matter of medical misinformation and its effects from the perspective of medical staff. Even more, the journal does not have a limitation regarding the length of the article or the number of references: "Manuscripts can be any length. There are no restrictions on word count, number of figures, or amount of supporting information". In addition, we have seen articles which addressed subjects related to health and the COVID – 19 pandemic, and which were published in PLOS ONE, that have more than 40 references. For example, one article entitled "Severity of infection with the SARS- CoV -2 B1.1.7 lineage among hospitalized COVID – 19 patients in Belgium" (<https://journals.plos.org/plosone/article?id=10.1371/journal.pone.0269138>), has 76 references, and another article, entitled "The coronavirus disease 2019 (COVID -19) vaccination psychological antecedent assessment using the ARABIC 5c validated tool: An online survey in 13 Arab countries" (<https://journals.plos.org/plosone/article?id=10.1371/journal.pone.0260321>) has 71 references.

Reviewer 1 point 7: Research Design (please to review examples of the journal manuscript preparation)

Response 7: We thank the reviewer for pointing out that we should describe more thoroughly the Research design of our paper. We explained how we addressed this suggestion earlier in this Cover letter, because the reviewer highlighted the suggestion in the summary from the e-mail sent to the corresponding author too. However, we will present again the way we complied with the suggestion. We did review examples of the journal manuscript preparation, and after we had done so, we deleted some text from the section "Sampling and data collection procedures" and moved it to the new section created. In this regard, at pages 17-18 of the revised manuscript with "Track changes" and "All markup" option active, lines 365-385, we inserted a sub-section entitled "Research design" which comprises the following text:

"The present study was conducted on Romanian healthcare professionals including doctors, nurses and medical students. The method used is quantitative. The questionnaire was administered online, the data was collected through the help of Google forms, and was disseminated on groups of healthcare professionals and students on platforms such as Facebook and WhatsApp, during the period April 2021–June 2021. The data we collected was firstly exported to Microsoft Excel, and then it was analyzed with IBM Statistical Package for the Social Sciences, version 20. The respondents were informed about the purpose of the study, about the fact that they were allowed to withdraw at any time, and they were asked to give their consent for participating in the study. The average time needed to complete the questionnaire was 15 minutes. Considering the validity of our research, we took into account the theoretical information from the literature regarding the development of a questionnaire. Our team of researchers together with health specialists have configured the dimensions, and operationalized the concepts in accordance with the theoretical approaches identified at the current stage of the research. Even more, we pre-tested the questionnaire before disseminating in order to guarantee the validity of the instrument. Thus, the questionnaire was completed by 50 respondents in the pre-testing stage. Considering the reliability of the research, we used split half reliability method. We split our sample in half, and we checked the variables in from our sub-samples in order to see if the variables provided similar results. The convergent results we obtained by applying the split half method showed that we obtained a high fidelity measurement."

Reviewer 1 point 8: methods and data (please to review the journal authors guideline). Also the research design is missed, please to clarify the research design used.

Response 8: We thank the reviewer for the suggestion. We reviewed again the journal author guidelines. Also, we added a research design section and the text contained in the section can be found at lines 365-385 of the manuscript with the "Track changes" and "All markup" option active.

Reviewer 1 point 9: start new sentence (line 333) in the PDF version of our manuscript  
Response 9: We thank the reviewer for the recommendation. We complied with it and we started a new sentence, at page 17 of the manuscript with "Track changes" and "All markup" option active, lines 372 we deleted the words "At the beginning of the questionnaire", and we started a new sentence with "The respondents were



informed...”.

Reviewer 1 point 10: Also this section should not include the data interpretation or analysis. it should include only description.

Response 10: The reviewer referred to the “Sample and data collection procedure” section. We are grateful to the reviewer for the suggestion and in order to comply with it we made some changes to the text which was written in this section. In this regard, the data interpretation and analysis was removed from the section, and was moved to the “Results” section of our paper. The deleted text together with the table can be seen at lines 427 –444 of the revised manuscript with “Track changes” and “All markup” option active. The text we inserted in the “Results” section can be seen at lines 486-501 of the manuscript:

“Out of the 536 respondents, 460 (85.8%) were female and 76 (14.2%) were male. A total of 411 respondents live in the urban area (76.7%), while 125 (23.3%) live in the rural area. Most respondents (286, 53.4%) are between 18 and 35 years of age, 142 respondents (26.5%) are between 36 and 50 years of age, 102 respondents (19.0%) are between 51 and 65 years of age, and 6 of them (1.1) are over 65 years of age. When it comes to the professional degree of the respondents, most of them are students at a university nursing program (122, 22.8%), and medical students (120, 22.4%). However, a total of 102 respondents (19.0%) are senior specialists medical – doctors, and 70 (13.1%) are nurses who have a higher education diploma. When it comes to the respondents field of specialization, most of them (70.5%) operate in the field of general medicine, while others are family doctors (10.4%), pediatricians (3%), dentists or oncologists (1.9%), surgeons of doctors who are specialized in internal medicine (1.5%), or infectious disease doctors, radiologists or cardiologists (1.1%). Furthermore, most of the respondents (77.2%) stated that they did not work a unit with COVID – 19 patients while few of them (22.8%) stated that they worked in such a unit at the time the research was conducted. Thus, all the characteristics of the sample are presented in Table 1.

Table 1. Sample characteristics (n = 536).

| Category                                       | Count | Percentage |
|------------------------------------------------|-------|------------|
| Gender                                         |       |            |
| Female                                         | 460   | 85.8%      |
| Male                                           | 76    | 14.2%      |
| Living environment                             |       |            |
| Urban                                          | 411   | 76.7%      |
| Rural                                          | 125   | 23.3%      |
| Age                                            |       |            |
| 18-35 years old                                | 286   | 53.4%      |
| 36-50 years old                                | 142   | 26.5%      |
| 51 -65 years old                               | 102   | 19.0%      |
| Over 65 years old                              | 6     | 1.1%       |
| Professional degree                            |       |            |
| Senior specialist medical - doctor             | 102   | 19.0%      |
| Specialist medical - doctor                    | 46    | 8.6%       |
| Resident                                       | 28    | 5.2%       |
| Nurse with higher education diploma            | 70    | 13.1%      |
| Nurse with other studies than higher education | 4     | 0.9%       |
| Medical student                                | 120   | 22.4%      |
| Student at university nursing program          | 122   | 22.8%      |
| Field of specialization                        |       |            |
| General medicine                               | 378   | 70.5%      |
| Family doctor                                  | 56    | 10.4%      |
| Pediatrics                                     | 16    | 3%         |
| Stomatology                                    | 10    | 1.9%       |
| Oncology                                       | 10    | 1.9%       |
| Surgery                                        | 8     | 1.5%       |
| Internal medicine                              | 8     | 1.5%       |
| Virology/ infectious disease doctor            | 6     | 1.1%       |
| Cardiology                                     | 6     | 1.1%       |
| Radiology                                      | 6     | 1.1%       |
| Other                                          | 3     | 0.6%       |
| Works in a unit with COVID – 19 patients       |       |            |
| Yes                                            | 122   | 22.8%      |
| No                                             | 414   | 77.2%      |

”  
Reviewer 1 point 11: please to explain how you calculated the sample size and the type of sampling that you used.

Response 11: We thank the reviewer for the suggestion. We offered an explanation for

this point, which was also mentioned by the reviewer in the summary provided in the e-mail sent to the corresponding author. However, we will present again the explanation, which can be found at lines 413-416 of the manuscript with “Track changes” and “All markup” option active:

“Taking into account the sampling method and the calculation of the study sample, we used random, probabilistic sampling method. We took into consideration specialists, physicians and medical students from Brasov, and we applied the snowballing method in order to disseminate the questionnaire.”

Reviewer 1 point 12: this section should be trasfered before data presentation and analysis with the methods part before data analysis

Response 12: The reviewer was referring to “The research instrument” section. We thank the reviewer for the suggestion. Since the section was already written before the “Data analysis” section, we moved the section before “Sampling and data collection procedures”. The deleted text can be seen at lines 446-465 in the revised the manuscript with “Track changes” and “All markup” option active. The section was moved and so, the following text can be found in the revised manuscript at lines 387-406:

“In order to conduct the research we used a quantitative method while having a questionnaire as an instrument. In this regard, we developed a questionnaire which comprises four sections: A. Influence of the pandemic on the professional activity of medical staff (items A1 to A4), B. Perception about the authorities’ communication process (items B1 to B11), C. Perception about the communication of non- validated treatments (items C1 to C20), and D. Sociodemographic questions (items D1 – D9), such as: gender, age, living environment, professional degree, field of specialization. The sociodemographic questions were used in order to identify different or similar attitudes between specific groups. The questionnaire can be found in “S1. Appendix English version of the questionnaire”, and in “S2. Appendix Romanian version of the questionnaire.” Before disseminating the questionnaire, the instrument was tested on 30 doctors who work in the field of cardiology and general medicine. The respondents understood clearly the questions and did not report any issue in the process of answering them. Hence, the questionnaire comprises close ended and open ended questions (Items A1, A4, B3, B11, C19, C20, D2, D5, D6,) dihotomic questions as well as questions whose answers were measured on a 7 point Likert scale. For example, item A2 measured the extent to which the respondents considered that the pandemic influenced the way they carried out their professional activity (1- “to an extremely little extent, 7 “to an extremely great extent”), or item B2 measure the respondents’ level of agreement with statements regarding the way authorities communicated during the pandemic (1 – “strongly disagree, 7-“strongly agree”).”

Reviewer 1 point 13: the validity and reliabity section is missed , please to discuss it clearly Response 13: We thank the reviewer for the recommendation. In order to

address the recommendation, we inserted into our manuscript information about the validity and reliability of our research in the “Research design” section. In this regard, at page 18 of the manuscript with “Track changes” and “All markup” option active, lines 376 – 385, we inserted the following explanation:

“Considering the validity of our research, we took into account the theoretical information from the literature regarding the development of a questionnaire. Our team of researchers together with health specialists have configured the dimensions, and operationalized the concepts in accordance with the theoretical approaches identified at the current stage of the research. Even more, we pre-tested the questionnaire before disseminating in order to guarantee the validity of the instrument. Thus, the questionnaire was completed by 50 respondents in the pre-testing stage.

Considering the reliability of the research, we used split half reliability method. We split our sample in half, and we checked the variables in from our sub-samples in order to see if the variables provided similar results. The convergent results we obtained by applying the split half method showed that we obtained a high fidelity measurement.”

Reviewer 1 point 14: you have two tables number by number 1 two times. please to review the tables numbering and indexing in the maneuscript.

Response 14: We are very grateful to the reviewer for pointing this out. We checked again all the numbers of the tables and corrected all the mistakes. Now in the revised manuscript, all the tables are correctly numbered.

Reviewer 1 point 15: these codes need to be interpreted ( to give its full interpretaion under each table)

Response 15: We thank the reviewer for the suggestion. The reviewer was referring to

the numbers of the questions which appear in the tables with correlations and t tests. Those numbers represent the number of the questions from the questionnaires which were included in the t tests or in the correlations. In other words, the numbers refer to the variables used in order to make the tests and the correlations. For example, in Table 3, C14 means, the question 14 from the questionnaire, which belongs to section C. Section C refers to Perception about the communication of non- validated treatments. So, under each table from our manuscript (including the tables which we put in supplementary information) we added an explanation of the codes (numbers). We would like to mention that the numbers of our tables changed, because in the initial manuscript we had two tables numbered 1, so now we corrected the mistake. Thus, we further present the explanation we gave in the revised manuscript with “Track changes” and “All markup” option active, under each table:

Table 3 (which was table 2 in the initial manuscript). The following explanation was added under the table: “1 1 C14 – refers to the question 14 from the section C of the manuscript (The extent to which information about alternative treatments affected trust in physicians), section which refers to Perception about the communication of non-validated treatments; 2D2 - refers to question 2 from the D section of the manuscript (age), which refers to Sociodemographic characteristics of the respondents

Table 8 (which was Table 7 in the initial manuscript). The following explanation was added under the table “1 B10- refers to the question 10 from the section B of the manuscript (Satisfaction with the way information about drugs used to treat the virus was communicated) section which refers to Perception about the authorities’ communication process; 2D2 - refers to question 2 from the D section of the manuscript (age), which refers to Sociodemographic characteristics of the respondents.”

Table 13 (which was Table 12 in the initial manuscript). The following explanation was added under the table “1 C1 – refers to question 1 from the section C of the manuscript (The extent to which social media represents an appropriate environment for sharing official COVID – 19 info), section which refers to Perception about the communication of non- validated treatments; 2D2 - refers to question 2 from the D section of the manuscript (age), which refers to Sociodemographic characteristics of the respondents.

Table 16 (which was Table 15 in the initial manuscript and which is in Supplementary information - S7 Tables with results to the 5th research question). The following explanation was added under the table “2A3 – refers to question 3 from the section A of the manuscript (Main aspect of professional life influenced by the pandemic), section which refers to Influence of the pandemic on the professional activity of medical staff; The explanation for 1 professional degree was already written under the table in the initial version of our manuscript.

Reviewer 1 point 16: the variables need to be clear on the table

Response 16: We thank the reviewer for pointing this out. The reviewer was referring to the variables from the table which had the number 3 in the initial version of our manuscript. The table now has the number 4, because we corrected the way we numbered the tables. Hence, in order to be clear which the variables in the table are, we put the word “variables” in front of the variables which were tested. The changes to the table can be seen in the revised version of our manuscript with “Track changes” and “All markup” option active at page 29:

“Table 4. Significant t-test results: comparisons between variables  
t-test for Equality of Means

GroupNMean S. D.tdfp Mean DifferenceStd. Error DifferenceCI4  
LowerUpper

Variables: Information about alternative treatments \_ Professional degree1Medical  
staff2945.331.54-2.04534.04-.27.13-.52-.01  
Student2425.601.49

Variables: Information about alternative treatments \_working unitUnit with COVID -19  
patients1225.191.61-2.13534.03-.33.15-.64-.02  
Unit without COVID 19 patients4145.531.49

Variables: Information about alternative treatments \_genderMale765.101.70-  
2.16534.03-.40.18-.77-.03  
Female4605.511.48

1Index variable from the professional degrees of respondents. Student: medical student and student at university nursing program, Medical Staff: Senior specialist medical – doctor, Specialist medical – doctor, Resident, Nurse with higher education diploma, Nurse with other studies than higher education”

|                                                                                                                                                                                                                                                                                                                                                                                                                                                                                                     |                                                                                                                                                                                                                                                                                                                                                                                                                                                                                                                                                                                                                                                                                                                                                                                                                                                                                                                                                                                                                                                                                                                                                                                                                                                                                                                                                                                                                                                                                                                                                                                                                                                                                                                                                                                                                                                                                                                                                                         |
|-----------------------------------------------------------------------------------------------------------------------------------------------------------------------------------------------------------------------------------------------------------------------------------------------------------------------------------------------------------------------------------------------------------------------------------------------------------------------------------------------------|-------------------------------------------------------------------------------------------------------------------------------------------------------------------------------------------------------------------------------------------------------------------------------------------------------------------------------------------------------------------------------------------------------------------------------------------------------------------------------------------------------------------------------------------------------------------------------------------------------------------------------------------------------------------------------------------------------------------------------------------------------------------------------------------------------------------------------------------------------------------------------------------------------------------------------------------------------------------------------------------------------------------------------------------------------------------------------------------------------------------------------------------------------------------------------------------------------------------------------------------------------------------------------------------------------------------------------------------------------------------------------------------------------------------------------------------------------------------------------------------------------------------------------------------------------------------------------------------------------------------------------------------------------------------------------------------------------------------------------------------------------------------------------------------------------------------------------------------------------------------------------------------------------------------------------------------------------------------------|
|                                                                                                                                                                                                                                                                                                                                                                                                                                                                                                     | <p>Reviewer 1 point 17: there keys need to be written in full interpretaion under each table.</p> <p>Response 17: We thank the reviewer for the recommendation. We complied with it, and as we explained at one of the previous points of the reviewer, the keys (or codes) refer to the number of the question from the questionnaire, and the letter refers to the section of the questionnaire. Hence, the reviewer referred to the table which had the number 7 in the initial version of our manuscript. The table has the number 8 in the revised version of our manuscript with "Track changes" and "All markup" option active, because we corrected the way we numbered the tables. Under table 8, at page 33 of the manuscript we added the following explanation:<br/> "1 B10- refers to the question 10 from the section B of the manuscript (Satisfaction with the way information about drugs used to treat the virus was communicated) section which refers to Perception about the authorities' communication process; 2D2 - refers to question 2 from the D section of the manuscript (age), which refers to Sociodemographic characteristics of the respondents."</p> <p>Reviewer 1 point 18: the tables are too much, please to focus on the highly significant tables and add the others as a supplementary tables. it is recommended to reduce the number of tables to 5 or 6 tables</p> <p>Response 18: We are very grateful to the reviewer for the useful suggestion. We complied with the suggestion and we deleted some tables from the manuscript and added them as supplementary information. Early in this Cover letter we provided an explanation for the tables, because this point was also included in the summary provided by the reviewer in the e-mail sent to the corresponding author. We let in the manuscript only the important tables: the tables with correlations and t tests, and the table with sociodemographic ch...</p> |
| <b>Additional Information:</b>                                                                                                                                                                                                                                                                                                                                                                                                                                                                      |                                                                                                                                                                                                                                                                                                                                                                                                                                                                                                                                                                                                                                                                                                                                                                                                                                                                                                                                                                                                                                                                                                                                                                                                                                                                                                                                                                                                                                                                                                                                                                                                                                                                                                                                                                                                                                                                                                                                                                         |
| <b>Question</b>                                                                                                                                                                                                                                                                                                                                                                                                                                                                                     | <b>Response</b>                                                                                                                                                                                                                                                                                                                                                                                                                                                                                                                                                                                                                                                                                                                                                                                                                                                                                                                                                                                                                                                                                                                                                                                                                                                                                                                                                                                                                                                                                                                                                                                                                                                                                                                                                                                                                                                                                                                                                         |
| <p><b>Financial Disclosure</b></p> <p>Enter a financial disclosure statement that describes the sources of funding for the work included in this submission. Review the <a href="#">submission guidelines</a> for detailed requirements. View published research articles from <a href="#">PLOS ONE</a> for specific examples.</p> <p>This statement is required for submission and <b>will appear in the published article</b> if the submission is accepted. Please make sure it is accurate.</p> | <p>The authors received no specific funding for this work.</p>                                                                                                                                                                                                                                                                                                                                                                                                                                                                                                                                                                                                                                                                                                                                                                                                                                                                                                                                                                                                                                                                                                                                                                                                                                                                                                                                                                                                                                                                                                                                                                                                                                                                                                                                                                                                                                                                                                          |

**Unfunded studies**

Enter: *The author(s) received no specific funding for this work.*

**Funded studies**

Enter a statement with the following details:

- Initials of the authors who received each award
- Grant numbers awarded to each author
- The full name of each funder
- URL of each funder website
- Did the sponsors or funders play any role in the study design, data collection and analysis, decision to publish, or preparation of the manuscript?
- **NO** - Include this sentence at the end of your statement: *The funders had no role in study design, data collection and analysis, decision to publish, or preparation of the manuscript.*
- **YES** - Specify the role(s) played.

\* typeset

**Competing Interests**

Use the instructions below to enter a competing interest statement for this submission. On behalf of all authors, disclose any [competing interests](#) that could be perceived to bias this work—acknowledging all financial support and any other relevant financial or non-financial competing interests.

This statement is **required** for submission and **will appear in the published article** if the submission is accepted. Please make sure it is accurate and that any funding sources listed in your Funding Information later in the submission form are also declared in your Financial Disclosure statement.

View published research articles from [PLOS ONE](#) for specific examples.

The authors have declared that no competing interests exist.



**NO authors have competing interests**

Enter: *The authors have declared that no competing interests exist.*

**Authors with competing interests**

Enter competing interest details beginning with this statement:

*I have read the journal's policy and the authors of this manuscript have the following competing interests: [insert competing interests here]*

\* typeset

**Ethics Statement**

Enter an ethics statement for this submission. This statement is required if the study involved:

- Human participants
- Human specimens or tissue
- Vertebrate animals or cephalopods
- Vertebrate embryos or tissues
- Field research

Write "N/A" if the submission does not require an ethics statement.

General guidance is provided below. Consult the [submission guidelines](#) for detailed instructions. **Make sure that all information entered here is included in the Methods section of the manuscript.**

APPROVAL OF THE COUNCIL OF THE FACULTY OF SOCIOLOGY AND COMMUNICATION

Approval request: Nr.378/30.03.2021

Form of consent obtained: oral

**Format for specific study types**

**Human Subject Research (involving human participants and/or tissue)**

- Give the name of the institutional review board or ethics committee that approved the study
- Include the approval number and/or a statement indicating approval of this research
- Indicate the form of consent obtained (written/oral) or the reason that consent was not obtained (e.g. the data were analyzed anonymously)

**Animal Research (involving vertebrate animals, embryos or tissues)**

- Provide the name of the Institutional Animal Care and Use Committee (IACUC) or other relevant ethics board that reviewed the study protocol, and indicate whether they approved this research or granted a formal waiver of ethical approval
- Include an approval number if one was obtained
- If the study involved *non-human primates*, add *additional details* about animal welfare and steps taken to ameliorate suffering
- If anesthesia, euthanasia, or any kind of animal sacrifice is part of the study, include briefly which substances and/or methods were applied

**Field Research**

Include the following details if this study involves the collection of plant, animal, or other materials from a natural setting:

- Field permit number
- Name of the institution or relevant body that granted permission

**Data Availability**

Authors are required to make all data underlying the findings described fully available, without restriction, and from the time of publication. PLOS allows rare exceptions to address legal and ethical concerns. See the [PLOS Data Policy](#) and [FAQ](#) for detailed information.

Yes - all data are fully available without restriction

A Data Availability Statement describing where the data can be found is required at submission. Your answers to this question constitute the Data Availability Statement and **will be published in the article**, if accepted.

**Important:** Stating 'data available on request from the author' is not sufficient. If your data are only available upon request, select 'No' for the first question and explain your exceptional situation in the text box.

Do the authors confirm that all data underlying the findings described in their manuscript are fully available without restriction?

**Describe where the data may be found in full sentences. If you are copying our sample text, replace any instances of XXX with the appropriate details.**

- If the data are **held or will be held in a public repository**, include URLs, accession numbers or DOIs. If this information will only be available after acceptance, indicate this by ticking the box below. For example: *All XXX files are available from the XXX database (accession number(s) XXX, XXX).*
- If the data are all contained **within the manuscript and/or Supporting Information files**, enter the following: *All relevant data are within the manuscript and its Supporting Information files.*
- If neither of these applies but you are able to provide **details of access elsewhere**, with or without limitations, please do so. For example:

*Data cannot be shared publicly because of [XXX]. Data are available from the XXX Institutional Data Access / Ethics Committee (contact via XXX) for researchers who meet the criteria for access to confidential data.*

*The data underlying the results presented in the study are available from (include the name of the third party*

All relevant data are within the manuscript and its Supporting Information files.

|                                                                                                                                                                                                                                         |  |
|-----------------------------------------------------------------------------------------------------------------------------------------------------------------------------------------------------------------------------------------|--|
| <p><i>and contact information or URL).</i></p> <ul style="list-style-type: none"><li>• This text is appropriate if the data are owned by a third party and authors do not have permission to share the data.</li></ul> <p>* typeset</p> |  |
| Additional data availability information:                                                                                                                                                                                               |  |

1 Misinformation about medication during the COVID – 19 pandemic: a perspective of medical  
2 staff

3

4 Claudiu Coman<sup>1#a\*</sup>, Maria Cristina Bularca<sup>1</sup>, Angela Repanovici<sup>2</sup>, Liliana Rogozea<sup>3</sup>

5 1 Department of Social Sciences and Communication, Faculty of Sociology and Communication,  
6 Transilvania University of Brasov, Brasov, Romania;

7 2 Department of Product Design, Mechatronics and Environment, Faculty of Product Design and  
8 Environment, Transilvania University of Brasov, Brasov, Romania

9 3 Basic, Preventive and Clinical Sciences Department, Transilvania University of Brasov, Brasov,  
10 Romania;

11

12 #a Current address: Department of Social Sciences and Communication, Faculty of Sociology and  
13 Communication, Transilvania University of Braşov, Brasov, România

14

15 \* Corresponding author

16 E-mail: [claudiu.coman@unitbv.ro](mailto:claudiu.coman@unitbv.ro) (CC)

17

18

19

20

21

22

23



## 24 **Abstract**

25

26 Background. Healthcare professionals had to face numerous challenges during the pandemic,  
27 their professional activity being influenced not only by the virus, but also by the spread of  
28 medical misinformation. In this regard, we aimed to analyze, from the perspective of medical  
29 staff, the way medical and non - medical information about the virus was communicated during  
30 the pandemic to encourage the development of future research or interventions in order to  
31 raise awareness about the way misinformation affected medical staff.

32 Methods and findings. The study was conducted on Romanian healthcare professionals. They  
33 were asked to answer to a questionnaire and the sample of the research includes 536  
34 respondents. The findings revealed that most respondents stated that information about  
35 alternative treatments against the virus affected the credibility of health professionals, and that  
36 younger professionals believed to a greater extent that trust in doctors was affected. The  
37 research also showed that respondents were well informed about the drugs used in clinical  
38 trials in order to treat the virus.

39 Conclusions. Healthcare professionals declared that the spread of misinformation regarding  
40 alternative treatments, affected their credibility and the relationship with their patients.  
41 Healthcare professionals had knowledge about the drugs used in clinical trials, and they  
42 acknowledged the role of social media in spreading medical misinformation. However, younger  
43 professionals also believed that social media could be used to share official information about  
44 the virus.

45

## 46 Introduction

47 The COVID 19 pandemic generated multiple changes in the way today's society  
48 members carry out their daily activities. One of the processes which was mostly affected by the  
49 pandemic was the communication process between institutions and the public, as well as  
50 between individuals. In this regard, from this perspective, while many domains were affected  
51 by the spread of the virus, such as the educational system or the cultural sector, the health  
52 sector was the one that faced the most challenges, [1].

53 "Caused by severe acute respiratory syndrome coronavirus 2 [2], the disease was  
54 firstly detected in December 2019, in Wuhan, China [3]. Due to the evolution of the virus, the  
55 World Health Organization declared the pandemic in March 2020 [4], and as of November 27  
56 over 61 million cases were reported [5]. In this regard, although several companies are  
57 struggling to develop a vaccine, and some of the proposed vaccines showed promising results  
58 [6], so far no vaccine was approved in order to be administrated to the entire population [7].  
59 Ever since the pandemic was declared, many companies started to be preoccupied with finding  
60 a treatment, and one method used that was adopted was administrating to patients, drugs that  
61 were previously used for curing other viruses [8]. Thus, one of the most well - known trials  
62 started was the SOLIDARITY trial, which focused on using various drugs including chloroquine  
63 and hydroxychloroquine, lopinavir or ritonavir [9]. However, even if those drugs were taught to  
64 have positive effects on treating the virus, they did not have a significant influence on  
65 preventing mortality in general [10].

66 With the development of many trials and programs meant to find a cure for COVID 19  
67 and with the use of diverse drug combinations, another major problem arose: misinformation

68 and fake news about the virus, its treatment or methods to combat it. In this regard, along with  
69 the pandemic, people also had to face an epidemic of information, described by the general  
70 director of WHO as an „infodemic” [11]. In other words, information about COVID 19 began to  
71 be spread by people on every available communication channel, both in the online and offline  
72 environment. However, very often and especially on social media, the information was poorly  
73 communicated, it was distorted and there usually wasn’t enough scientific evidence to  
74 demonstrate its validity [12].

75         Taking into account the previously mentioned aspects the paper addresses the issues of  
76 drugs tested and used for the treatment of COVID 19 and how information about COVID 19 was  
77 communicated in the offline and online environment. The purpose of the paper is to analyze,  
78 from the perspective of medical staff, the way medical and non - medical information about the  
79 virus was communicated during the pandemic in order to encourage the development of future  
80 research or interventions in order to raise awareness about the way misinformation affected  
81 medical staff. Thus, the paper aims at finding an answer to three research questions: (1) to  
82 what extent information about alternative treatments affected the credibility of medical staff?  
83 (2) What is the knowledge of medical staff about the type of drugs that had positive effects on  
84 treating the disease and about alternative treatments? (3) How satisfied is the medical staff  
85 with the way medical and non-medical information was communicated online and offline  
86 during the pandemic? (4) What is the perception of medical staff about the role of social media  
87 in spreading misinformation about the virus? (5) What aspects of the professional activity of the  
88 medical staff were affected most by the COVID – 19 pandemic?

## 89 **Literature review**

## 90 **Information on drugs used to treat COVID 19**

91 Before analyzing the way information about the virus was communicated in the online  
92 environment, it is important to take a look at the drugs used to treat the disease. Hence, one of  
93 the most important issues that appeared with the COVID 19 pandemic, was finding the right  
94 treatment for the virus. In this regard, researchers started to develop many experimental trials  
95 and used diversified drug combinations in order to treat patients with COVID 19. However,  
96 information that was communicated about the effectiveness of certain drugs was often  
97 contradictory.

98 Chloroquine and hydroxychloroquine are two drugs that were tested and included in  
99 many trials. Both drugs were previously used to treat malaria but they also have antiviral  
100 effects on viruses like HIV since they have the ability to prevent the virus to enter in the host  
101 cells [13]. Even though they have similar compounds, chloroquine is taught to have more  
102 negative effects than hydroxychloroquine [14], and hydroxychloroquine is considered safer due  
103 to the fact that it can be tolerated better for a longer period of time [15].

104 While some studies show positive effects of hydroxychloroquine in inhibiting the  
105 infection with the virus in vitro [16, 17], other studies found no influence of the drug on  
106 mortality rate or time spent by patients in the hospital [18]. However, when  
107 hydroxychloroquine was combined with other drugs such as azithromycin, it showed beneficial  
108 effects in treating patients with COVID 19 [19].

109 Nonetheless the findings regarded the effectiveness of these drugs were contrasting.  
110 For example, on March 28 2020 the Food and Drug Administration (FDA) issued an Emergency  
111 Use Authorization for using hydroxychloroquine in treating people suffering from COVID 19

112 [20], and in June 15 2020, the FDA retracted the authorization stating that the trials in which  
113 the drug was involved showed that the drug had no effect on the faster recovery of patients or  
114 on decreasing chances of death [21]. Even more, on 5th June 2020 the UK trial, Randomised  
115 Evaluation of COVID 19 THERAPY (RECOVERY), also stopped testing the drug on patients  
116 because the results showed no benefits in improving the conditions of hospitalized patients  
117 with COVID 19 [22].

118         Studies were carried out with other drugs such as lopinavir/ritonavir, an antiviral drug  
119 used in the treatment of HIV [23]. While in concentration of 4 µg/ml and 50 µg/ml, the drug  
120 showed positive effects against the virus in vitro [24], a study on 199 patients, from which 99  
121 received the drug and the other 100 did not receive the drug, revealed that lopinavir/ritonavir  
122 had no benefits when it comes to diminishing mortality or improving the state of patients with  
123 severe symptoms [25].

124 Controversial discussions also involved the use of Ibuprofen, a Non-steroidal anti-inflammatory  
125 drug that is used to treat fever, or inflammation [26]. Since the pandemic was declared there  
126 has been a preoccupation regarding ibuprofen and its role in making people more vulnerable to  
127 contacting the virus. Thus, right after the declaration of the pandemic, in a letter addressed to  
128 The Lancet Journal, researchers pointed out that ibuprofen could make people with diabetes,  
129 cardiac disease or hypertension more likely to get infected with virus and have severe  
130 symptoms [27]. However, while firstly, WHO recommended people who are infected with the  
131 virus not to take ibuprofen, only one day after that recommendation, on 18 March 2020, WHO  
132 corrected its statement and mentioned that it "does not recommend against ibuprofen" [28].  
133 Even more, a study focusing on the use of ibuprofen showed that the drug does not make



134 patients feel worse [29] and another study that analyzed the use of ibuprofen and paracetamol  
135 of 403 COVID 19 confirmed patients revealed that compared to paracetamol, ibuprofen did not  
136 aggravated the clinical state of the patients [30].

137           While other drugs failed to show beneficial effects on the treatment of COVID 19, drugs  
138 like dexamethasone, which is included in the UK RECOVERY trial, revealed positive effects on  
139 people suffering from COVID 19: the drug lowered the risk of death in patients on ventilators  
140 from 40% to 28% and in patients who were in need of oxygen, from 25% to 20%, but did not  
141 influence the state of patients who did not need oxygen [31, 32].

142           Another highly tested drug was Remdesivir, an antiviral drug produced by Gilead  
143 Sciences that was previously used in treating Ebola [33]. The information regarding its positive  
144 effects on treating COVID 19 is also contradictory. A study conducted from February 6 2020  
145 until March 12 2020, on 237 patients, showed that the drug did not bring any benefits for  
146 people that had severe symptoms of COVID 19 [34], while a more recent study revealed that  
147 Remdesivir had a more positive effect in reducing the time of recovery in patients with COVID  
148 19 that showed signs of respiratory issues, than it had the placebo effect [35]. However, the  
149 FDA approved on October 22 2020, the use of Remdesivir in the case of adults and also children  
150 aged 12 or older who have at least 44 kilograms, who are infected with the virus and need to be  
151 treated in the hospital [36], and as of November 20 2020, FDA allows, in emergency cases, the  
152 use of Remdesivir in combination with Baricitinib, for adults and children aged two or older that  
153 require oxygen and treatment in the hospital [37].

## 154 **Social media and COVID 19 misinformation**

155            Together with the health crisis, the COVID 19 pandemic generated an information crisis,  
156 often described as an infodemic, that is represented by the spread of fake news, misguided and  
157 false information, especially in the online environment [38].

158            In this context, social media plays an essential role in disseminating information. Social  
159 media consists of internet based channels that provide people with the opportunity to interact,  
160 communicate in asynchronous way and in real time, with either small or large audiences where  
161 value is derived from user generated content [39]. Social media comprises multiple social  
162 networks, which according to Boyd and Ellison, offer users the possibility to create profiles that  
163 are public, or semi-public, to create a list of people with whom they can interact and share  
164 information and to view the list of connections that other users make [40].

165            Social media channels are often used in time of crisis not only by citizen, but also by  
166 official authorities, emergency services, because they can facilitate communication and the  
167 spread of valuable information that can contribute to surpassing the crisis [41]. Social networks  
168 like Facebook, Whatsapp, Twitter, Instagram can function as sources that have the ability to  
169 confirm or complete the information communicated by the authorities, while also receiving  
170 feedback from the public [42]. Thus, sending messages through social media channels is a  
171 strategy that can help authorities obtain feedback on certain proposals regarding public health  
172 policies [43]. Even more, a study regarding the influence of social media on the way people  
173 protect their health during the pandemic, showed that social media can have positive impact on  
174 increasing awareness about public health and protection against the virus [44].

175           However, during the pandemic, while authorities can use social media to keep the  
176 public informed, a major issue generated by social media, that public health representatives  
177 have to face, is the spread of fake news [45].

178           Fake news are represented by fabricated information designed in the form of news  
179 communicated by the media that do not share the same process of organization and do not  
180 have the same intent, and fake news are related to misinformation: information that is false or  
181 misleading, and disinformation: a type of false information whose aim is to deceive people [46].

182           Thus, the internet became a favorable environment for spreading conspiracy theories or  
183 false information about alternative treatment for the virus. Since people were stressed and  
184 frightened by the uncertainty of the situation, they started to consider reasonable and valid any  
185 information that presented explanations in regards to the virus [47]. Thus, when referring to  
186 health information, false news often undermine the credibility of official sources, they create  
187 confusion among people and favor the faster spread of the virus [48].

188           Misinformation during the pandemic can negatively influence peoples' health because  
189 false information is not easy to recognize, because it can determine people to change their  
190 behavior in a way that is harmful to their health and those around them. Thus, since the  
191 pandemic was declared, false information has been spread about the origin of the virus, about  
192 what caused it, how it spreads and what treatment is efficient for eliminating it [49]. However,  
193 a study focusing on the WhatsApp platform showed that when the information on social media  
194 is shared by trusted sources, it can increase knowledge about the virus and encourage people  
195 to adopt preventive behavior [50].

196           During the time of crisis, on platforms like WhatsApp or Facebook, more and more false  
197 news and unverified information about the virus began to be shared. With millions of users  
198 worldwide, WhatsApp became one of the platforms where most fake news were shared by  
199 forwarding messages to many users [51], while Facebook was characterized as the core,  
200 epicenter of misinformation [52].

201           When it comes to health misinformation on social media, the most discussed subjects  
202 are alternative cures involving certain food or drinks, hygiene related actions and treatment  
203 drugs. Thus, among the most “recommended” practices for preventing or curing COVID were  
204 drinking hot water every 15 minutes in order for the virus to go into the stomach, eating garlic,  
205 taking vitamin C or even pointing a hairdryer to the nostrils because the heat could eliminate  
206 the virus [53].

207 False news that circulated on social media regarding the virus also involve the idea that the  
208 virus was created on purpose in a lab, three in ten Americans considering true this information  
209 [54].

210           However, many other unverified methods were shared and the most forwarded  
211 messages on WhatsApp presented information about the fact that if people hold their breath  
212 for ten seconds without coughing then they are not infected with the virus, about the idea that  
213 at temperatures of 30-35 Celsius degrees the virus will die, messages about the release of the  
214 vaccine or about drugs allegedly recommended by Chinese doctors that could be efficient in  
215 eliminating the virus [55].

216           Nonetheless, misinformation became a major issue in the context of the pandemic, but  
217 also a subject of interest for researchers. A study focusing on the spread of fake news showed

218 that most news reconfigure and twist the original information thus creating a different context,  
219 and that most of them contain false information about public authorities and health  
220 organizations [56].

221 Another study found that people who tend to rely on their intuition or who possess little  
222 scientific knowledge about certain subjects, encountered difficulties in differentiating true and  
223 false information [57]. Thus, misleading or unverified information can negatively influence the  
224 way people behave. For example, people in USA who died after they consumed chloroquine  
225 may have used the drug because news about it mentioned that it could treat and eliminate the  
226 virus [58]. Even more, a study concerning misinformation on Facebook revealed that posts  
227 made from verified accounts contained more false information than the accounts that were not  
228 verified [59], while other study conducted from 23 April 2020 to 27 April 2020, focused on  
229 perception about contradictory information and stated that 73% of participants mentioned  
230 they observed or were exposed to contrasting messages usually communicated by politicians or  
231 health experts [60].

232         Apart from influencing peoples' beliefs or health practices, COVID 19 fake news also  
233 influenced the activity of health professionals. Social media managed to increase the level of  
234 trust in information that comes from people's personal opinions rather than professionals [61],  
235 and doctor's credibility is often affected. In order to improve these situations, doctors must be  
236 willing to use social media not just to send messages, but to actively communicate with people,  
237 to offer feedback, to share their experiences and rectify and clarify the fake news presented on  
238 social media [62].

239           Among action from health professionals, in order to combat COVID 19 fake news, social  
240 media networks as well as public authorities must implement some strategies. For example, the  
241 government of United Kingdom developed collaboration programs between its rapid response  
242 teams and social media platforms, and Taiwan introduced greater fines for news that were  
243 proven to be false [63]. Moreover, even though some social networks such as Facebook or  
244 Twitter already implemented algorithms to identify and remove fake accounts [64], or to  
245 correct information [65], they should further develop efficient strategies in order to validate the  
246 information that people share [66].

247  
248

### 249 **The influence of the pandemic on doctors' credibility and relationship** 250 **with patients**

251 The way information regarding the virus was communicated online and offline during the  
252 pandemic played an essential role in the process of maintaining trust in health professionals. In  
253 this regard, a previous longitudinal study conducted in Poland revealed that trust in physicians  
254 has declined from 2018 – 2020, and emphasized the idea that the decrease may be caused by  
255 the health problems that people had to cope with during the pandemic and the problems with  
256 the healthcare system of the country [67]. In Romanian context, a previous study showed that  
257 the communication process of the healthcare system was poor and confusing, and that public  
258 health authorities at national level focused more on global information about the virus, while  
259 local authorities failed to succeed in providing their “share of information” [68]. Another study,  
260 which focused on analyzing the online communication of Public Health Agencies from Italy,  
261 United States and Sweden, revealed that compared to Sweden and the United States, agencies  
262 from Italy collaborated more with other organizations, and that overall, the communication

263 process of the agencies was coordinated by their members, that agencies also communicated  
264 with governments, but they rarely collaborated with political or non-governmental  
265 organizations [69]. Hence, while trust in the government and communication from authorized  
266 organizations is essential, the importance of trusting the professionals is highlighted by a study  
267 conducted in Thailand, which showed that in the cases in which people have low levels of trust  
268 in the government, trust in professionals can have a positive influence on the adoption of  
269 protective measures at the individual level [70].

270 Furthermore, another previous study conducted in Poland, revealed that information  
271 can have the power to influence the level of trust that people have in the healthcare system  
272 and in healthcare professionals, suggesting that an increase of trust in hospitals, may be  
273 associated with a decrease of trust in physicians [71].

274 While focusing on studying people's response to non- pharmaceutical interventions,  
275 conspiracy theories and alternative treatments, a study conducted in Finland showed that the  
276 level of trust people have in the system implemented in order to provide information about the  
277 virus, has an essential role in the way people react to the official measures recommended.  
278 Hence, most participants in the study were between 40 and 60 years of age, and the study  
279 emphasized that people who were less willing to comply with the non-pharmaceutical  
280 interventions implemented by the government, tended to believe more in conspiracies and had  
281 low levels of trust in the sources which provided information about the virus [72].

282 Another study, which focused on examining the relationship between trust in the  
283 healthcare system and people's choice of seeking medical help when they experienced COVID –

284 19 symptoms, concluded that high levels of trust in the healthcare system can increase the  
285 probability of asking for medical help when people first notice COVID – 19 symptoms [73].

286 Taking into account the aspects mentioned above, we can infer that peoples' trust in  
287 doctors was affected during the pandemic. In this regard, in the context of misinformation, one  
288 of the reasons why people lost trust in doctors may be the fact that, besides using social media  
289 for communicating information, for networking or for interacting with patients, many medical  
290 or dental practitioners used social media to express their professional opinions about the virus,  
291 opinions which were not validated and which later proven to be inaccurate [74]. In other words,  
292 health professionals may have contributed to the spread of misinformation, and such behavior  
293 can contribute to the decrease of trust in medical processes and in healthcare professionals  
294 [75]. Other researchers who focused on examining medical misinformation, found that most  
295 doctors (94.2%) stated that patients had medical misinformation, and the subjects about they  
296 had the most inaccurate information were represented by COVID – 19 vaccines, COVID – 19  
297 origin, treatment or essential oils [76]. Furthermore, a previous study discovered that trust in  
298 doctors increased with age, and communication difficulties decreased, and that trust in doctors  
299 decreased while the level of education and communication difficulties increased [77].

300 Hence, while acknowledging that the pandemic influenced the trust in medical  
301 professionals, another aspect that was negatively influenced was the relationships between  
302 doctors and their patients. A study which focused on examining the doctor – patient interaction  
303 from the perspective of both groups of people, revealed differences in the respondents'  
304 opinions. Thus, most doctors stated that they still make eye contact (72%) and that they still



305 show patients empathy, but only few patients declared that their doctors made eye contact  
306 (56,8%) or showed them empathy (43,2%) [78].

### 307 **Materials and methods** **Research design**

308 The present study was conducted on Romanian healthcare professionals including doctors,  
309 nurses and medical students. The method used is quantitative. The questionnaire was  
310 administrated online, the data was collected through the help of Google forms, and was  
311 disseminated on groups of healthcare professionals and students on platforms such as  
312 Facebook and WhatsApp, during the period April 2021– June 2021. The data we collected was  
313 firstly exported to Microsoft Excel, and then it was analyzed with IBM Statistical Package for the  
314 Social Sciences, version 20. The respondents were informed about the purpose of the study,  
315 about the fact that they were allowed to withdraw at any time, and they were asked to give  
316 their consent for participating in the study. The average time needed to complete the  
317 questionnaire was 15 minutes.

318 Considering the validity of our research, we took into account the theoretical information from  
319 the literature regarding the development of a questionnaire. Our team of researchers together  
320 with health specialists have configured the dimensions, and operationalized the concepts in  
321 accordance with the theoretical approaches identified at the current stage of the research.  
322 Even more, we pre-tested the questionnaire before disseminating in order to guarantee the  
323 validity of the instrument. Thus, the questionnaire was completed by 50 respondents in the  
324 pre-testing stage. Considering the reliability of the research, we used split half reliability  
325 method. We split our sample in half, and we checked the variables in from our sub-samples in

326 order to see if the variables provided convergent results. The convergent results we obtained  
327 by applying the split half method showed that we obtained a high fidelity measurement.

328

## 329 **The research instrument**

330 In order to conduct the research we used a quantitative method while having a questionnaire  
331 as an instrument. In this regard, we developed a questionnaire which comprises four sections:

332 A. Influence of the pandemic on the professional activity of medical staff (items A1 to A4), B.

333 Perception about the authorities' communication process (items B1 to B11), C. Perception

334 about the communication of non- validated treatments (items C1 to C20), and D.

335 Sociodemographic questions (items D1 – D9), such as: gender, age, living environment,

336 professional degree, field of specialization. The sociodemographic questions were used in order

337 to identify different or similar attitudes between specific groups. The questionnaire can be

338 found in "S1.Appendix English version of the questionnaire", and in "S2. Appendix Romanian

339 version of the questionnaire." Before disseminating the questionnaire, the instrument was

340 tested on 30 doctors who work in the field of cardiology and general medicine. The

341 respondents understood clearly the questions and did not report any issue in the process of

342 answering them. Hence, the questionnaire comprises close ended and open ended questions

343 (Items A1, A4,B3, B11, C19, C20, D2, D5, D6,) dihotomic questions as well as questions whose

344 answers were measured on a 7 point Likert scale. For example, item A2 measured the extent to

345 which the respondents considered that the pandemic influenced the way they carried out their

346 professional activity (1- "to an extremely little extent, 7 "to an extremely great extent"), or item

347 B2 measure the respondents' level of agreement with statements regarding the way authorities  
348 communicated during the pandemic (1 – “strongly disagree, 7-“ strongly agree”).

### 349 **Sampling and data collection procedures**

350 In order to conduct the research we used a quantitative method while having as an instrument  
351 a questionnaire. The responses were collected online, with the help of Google forms, and the  
352 questionnaire was self – administrated. The research received approval from The Council of the  
353 Faculty of Sociology and Communication, approval request Nr.378/30.03.2021. **Taking into**  
354 **account** the sampling method and the calculation of the study sample, we used random,  
355 probabilistic sampling method. We took into consideration specialists, physicians, and medical  
356 students from Brasov, and we applied the snowballing method in order to disseminate the  
357 questionnaire. The sample of our study comprises 536 respondents, and includes doctors,  
358 nurses as well as medical students from Romania.

359

### 360 **Data analysis**

361 Data was analyzed with IBM Statistical Package for the Social Sciences, version 20. In order to  
362 analyze the data and identify differences and similarities between the attitudes of certain  
363 groups, t tests for independent samples were performed. The t test were performed among  
364 groups: male/female, working in unit with COVID – 19 patients/ not working in unit with COVID  
365 – 19 patients, urban/rural area, and professional degree: medical staff/students. Hence, in  
366 order to be able to analyze the results depending on professional degree, we computed the  
367 variable of professional degree which had the following values: senior specialist medical –

368 doctor, specialist medical – doctor, resident, nurse with higher education diploma, nurse with  
369 other studies than higher education, medical student, student at university nursing program, in  
370 a new variable. Thus, doctors, nurses and residents, were integrated in a new group called  
371 “medical staff”, while medical students and students at university nursing programs were  
372 integrated in the group “students”. Moreover, for a better understanding of the way some  
373 variables correlate with each other, (for example: respondents satisfaction with the way  
374 authorities communicated during the pandemic and age, respondents’ opinion about the way  
375 misinformation about alternative treatments influenced doctors’ credibility and age), we also  
376 calculated the Pearson coefficient.

## 377 **Results**

378  
379 Out of the 536 respondents, 460 (85.8%) were female and 76 (14.2%) were male. A total of 411  
380 respondents live in the urban area (76.7%), while 125 (23.3%) live in the rural area. Most  
381 respondents (286, 53.4%) are between 18 and 35 years of age, 142 respondents (26.5%) are  
382 between 36 and 50 years of age, 102 respondents (19.0%) are between 51 and 65 years of age,  
383 and 6 of them (1.1) are over 65 years of age. When it comes to the professional degree of the  
384 respondents, most of them are students at a university nursing program (122, 22.8%), and  
385 medical students (120, 22.4%). However, a total of 102 respondents (19.0%) are senior  
386 specialists medical – doctors, and 70 (13.1%) are nurses who have a higher education diploma.  
387 When it comes to the respondents field of specialization, most of them (70.5%) operate in the  
388 field of general medicine, while others are family doctors (10.4%), pediatricians (3%), dentists  
389 or oncologists (1.9%), surgeons of doctors who are specialized in internal medicine (1.5%), or

390 infectious disease doctors, radiologists or cardiologists (1.1%). Furthermore, most of the  
 391 respondents (77.2%) stated that they did not work a unit with COVID – 19 patients while few of  
 392 them (22.8%) stated that they worked in such a unit at the time the research was conducted.  
 393 Thus, all the characteristics of the sample are presented in Table 1.

394 **Table 1.** Sample characteristics (n = 536).

|                         | <b>Category</b>                                | <b>Count</b> | <b>Percentage</b> |
|-------------------------|------------------------------------------------|--------------|-------------------|
| Gender                  | Female                                         | 460          | 88.8%             |
|                         | Male                                           | 76           | 14.2%             |
| Living environment      | Urban                                          | 411          | 76.7%             |
|                         | Rural                                          | 125          | 23.3%             |
| Age                     | 18-35 years old                                | 286          | 53.4%             |
|                         | 36-50 years old                                | 142          | 26.5%             |
|                         | 51 -65 years old                               | 102          | 19.0%             |
|                         | Over 65 years old                              | 6            | 1.1%              |
| Professional degree     | Senior specialist medical - doctor             | 102          | 19.0%             |
|                         | Specialist medical - doctor                    | 46           | 8.6%              |
|                         | Resident                                       | 28           | 5.2%              |
|                         | Nurse with higher education diploma            | 70           | 13.1%             |
|                         | Nurse with other studies than higher education | 48           | 9.0%              |
|                         | Medical student                                | 120          | 22.4%             |
|                         | Student at university nursing program          | 122          | 22.8%             |
| Field of specialization | General medicine                               | 378          | 70.5%             |
|                         | Family doctor                                  | 56           | 10.4%             |
|                         | Pediatrics                                     | 16           | 3%                |
|                         | Stomatology                                    | 10           | 1.9%              |
|                         | Oncology                                       | 10           | 1.9%              |
|                         | Surgery                                        | 8            | 1.5%              |
|                         | Internal medicine                              | 8            | 1.5%              |
|                         | Virology/ infectious disease                   | 6            | 1.1%              |

|                                                |            |     |       |
|------------------------------------------------|------------|-----|-------|
|                                                | doctor     |     |       |
|                                                | Cardiology | 6   | 1.1%  |
|                                                | Radiology  | 6   | 1.1%  |
|                                                | Other      | 32  | 6%    |
| Works in a unit<br>with COVID – 19<br>patients | Yes        | 122 | 22.8% |
|                                                | No         | 414 | 77.2% |

395

396 **1) To what extent information about alternative treatments affected**  
 397 **the credibility of medical staff?**

398

399 The results of our research revealed that respondents were of the opinion that information  
 400 about alternative treatments for COVID -19 affected the credibility of healthcare professionals.  
 401 Hence, most respondents (32.5%), stated that trust in healthcare professionals was affected to  
 402 a an extremely great extent by the information about alternative treatments, many of them  
 403 declared that credibility was affected to a very great extent (23.1%), and to a great extent  
 404 (21.3%) ( S3\_ tables with results for 1<sup>st</sup> research question -Table 2 ).

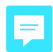


---



---



---



---



---



---



---



---



---



---

405

406 Furthermore, the Pearson correlation performed between the extent to which  
 407 respondents believed that information about alternative treatments affected people’s trust in

408 doctors and the age of the respondents, revealed a weak, negative and statistically significant  
 409 correlation between the two variables ( $r(534) = -.155, p=0.001$ ) (Table 3). Hence, as the age of  
 410 the medical staff decreases, the extent to which they believe the credibility of doctors was  
 411 affected increases. In other words, compared to older healthcare professionals, younger  
 412 healthcare professionals tend to believe more that information about alternative treatments  
 413 affected trust in doctors. One possible explanation for this result can be that younger people  
 414 tend to be fonder of keeping up with trends and being up to date, and in this context, it is  
 415 possible that they came into contact more frequently with information about certain  
 416 alternative treatments for COVID – 19, this making them more aware about the way such  
 417 treatments can undermine doctor’s credibility.

**Table 3.** Pearson correlation between information about alternative treatments and age

|                                                                                                             |                     | C14. The extent to which information about alternative treatments affected trust in physicians | D2. Age |
|-------------------------------------------------------------------------------------------------------------|---------------------|------------------------------------------------------------------------------------------------|---------|
| C14. <sup>1</sup> The extent to which information about alternative treatments affected trust in physicians | Pearson Correlation | 1                                                                                              | -.155** |
|                                                                                                             | Sig. (2-tailed)     |                                                                                                | .000    |
|                                                                                                             | N                   | 536                                                                                            | 536     |
| D2. <sup>2</sup> Age                                                                                        | Pearson Correlation | -.155**                                                                                        | 1       |
|                                                                                                             | Sig. (2-tailed)     | .000                                                                                           |         |
|                                                                                                             | N                   | 536                                                                                            | 536     |

\*\* . Correlation is significant at the 0.01 level (2-tailed).

<sup>1</sup> C14 – refers to the question 14 from the section C of the manuscript (The extent to which information about alternative treatments affected trust in physicians), section which refers to Perception about the communication of non- validated treatments

<sup>2</sup> D2 - refers to question 2 from the D section of the manuscript (age), which refers to Sociodemographic characteristics of the respondents

418

419 In order to observe if there any differences in the opinion of the respondents depending  
 420 on certain variables including, age, gender, or living environment, we performed t tests for  
 421 independent samples. The results of the significant t tests (Table 4), showed that students  
 422 believed to a greater extent (M= 5.60, SD=1.49), that information about alternative treatments  
 423 negatively affects the credibility of doctors, than the medical staff (M=5.33, SD=1.54). Also,  
 424 respondents who declared they worked in a unit without COVID – 19 patients (M=5.53,  
 425 SD=1.49), were more of the opinion that information about alternative cures affected trust in  
 426 health professionals, than respondents who worked in a unit with COVID – 19 patients (M=5.19,  
 427 SD=1.61). One possible explanation would be that, doctors who interacted with COVID – 19  
 428 patients may have observed that when being put in the situation to receive medical care in the  
 429 hospital, patients still had faith and trust in doctors. Moreover, another explanation is that  
 430 respondents who did not come into contact with COVID – 19 patients were not that close with  
 431 the situation and thus they might have had a more distorted perception about the situation  
 432 than those professionals who interacted with COVID – 19 patients. Moreover, the results of the  
 433 research also showed that female respondents (M=5.51, SD=1.48), believed more than male  
 434 respondents (M=5.10, SD=1.70), that trust in healthcare professionals was affected by the  
 435 information about alternative treatments.

436 **Table 4.** Significant t-test results: comparisons between variables

|            | Group         | N   | Mean | S. D. | t     | df  | p   | t-test for Equality of Means |                       |           |       |
|------------|---------------|-----|------|-------|-------|-----|-----|------------------------------|-----------------------|-----------|-------|
|            |               |     |      |       |       |     |     | Mean Difference              | Std. Error Difference | CI4 Lower | Upper |
| Variables: | Medical staff | 294 | 5.33 | 1.54  | -2.04 | 534 | .04 | -.27                         | .13                   | -.52      | -.01  |



|                                                                             |                                |     |      |      |       |     |     |      |     |      |      |
|-----------------------------------------------------------------------------|--------------------------------|-----|------|------|-------|-----|-----|------|-----|------|------|
| Information about alternative treatments _ Professional degree <sup>1</sup> | Student                        | 242 | 5.60 | 1.49 |       |     |     |      |     |      |      |
| Variables: Information about alternative treatments _working unit           | Unit with COVID -19 patients   | 122 | 5.19 | 1.61 | -2.13 | 534 | .03 | -.33 | .15 | -.64 | -.02 |
|                                                                             | Unit without COVID 19 patients | 414 | 5.53 | 1.49 |       |     |     |      |     |      |      |
| Variables: Information about alternative treatments _gender                 | Male                           | 76  | 5.10 | 1.70 | -2.16 | 534 | .03 | -.40 | .18 | -.77 | -.03 |
|                                                                             | Female                         | 460 | 5.51 | 1.48 |       |     |     |      |     |      |      |

437 <sup>1</sup>Index variable from the professional degrees of respondents. Student: medical student and student at university  
438 nursing program, Medical Staff: Senior specialist medical – doctor, Specialist medical – doctor, Resident, Nurse  
439 with higher education diploma, Nurse with other studies than higher education  
440

441 **2) What is the knowledge of medical staff about the type of drugs that**  
442 **had positive effects on treating the disease and about alternative**  
443 **treatments?**

444  
445 Considering the type of drugs which were known to have positive effects on treating the virus,  
446 the research revealed that type of drug about which the respondents have heard it had positive  
447 effects against the virus was Dexamethasone (46.6%), closely followed by Remdesivir (40.5%)  
448 and Azithromicin (38.4%). However, some of the respondents also mentioned Chloroquine,  
449 Hydroxychloroquine (23.1%), Ibuprofen (19.8%), Tocilizumab (15.9%), and Favipiravir (13.8%) as  
450 drugs known to have positive effects when dealing with COVID – 19 ( S4\_ Tables with results to  
451 the 2<sup>nd</sup> research question\_Table 5). Hence, the research showed that the medical staff had  
452 knowledge about the type of drugs tested or used against the virus, which were taught to be  
453 efficient in treating the disease.  
454

455 In the context of respondents' perception about alternative methods of preventing and treating  
456 the virus, the findings show that, most of them stated that they heard about the fact that  
457 alcohol consumption can prevent the infection with the virus (24.3%), that drinking warm water  
458 every 15 minutes may help eliminate the virus (21.3%), but also that pointing the hot air of the  
459 hairdryer to the nostrils leads to the elimination of the virus (16.8%) ( S4\_ tables with results to  
460 the 2<sup>nd</sup> reseach question\_Table 6).

461

462 **3) How satisfied is the medical staff with the way medical and non-**  
463 **medical information was communicated during the pandemic?**

464

465 The findings of the study revealed that respondents were mostly dissatisfied with the way  
466 medical and non – medical information was communicated during the pandemic. Hence, the  
467 sum of the responses with negative valences of the study participants (extremely dissatisfied,  
468 very dissatisfied and dissatisfied), showed that 238 of them, (44.4%) were dissatisfied with the  
469 process of sending medical and non- medical information, while the sum of the positive  
470 responses (satisfied, very satisfied, extremely satisfied) showed that 162 of them (30.2%),  
471 were satisfied with the communication process (S5\_ Tables with results to the 3<sup>rd</sup> research  
472 question\_Table 7 ). In other words, the study highlighted that respondents registered mostly  
473 low level of satisfaction with the way information was sent during the pandemic.

474

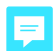

---

---

---

---

---

475  
 476 Furthermore, in the context of the medical staff's satisfaction with the way information  
 477 about drugs used to treat the virus was communicated at national level, the research showed  
 478 that as age of the respondents decreases, the level of satisfaction increases ( $r(534) = -.091$ ,  
 479  $p=0.035$ ) (Table 8). Thus, according to this result, it can be inferred that younger people were  
 480 more satisfied than older people, with how information about drugs used to treat the virus was  
 481 communicated.

**Table 8.** Pearson Correlation: satisfaction with the way information about drugs used to treat the virus was communicated and age

|                                                                                                               |                     | B10. Satisfaction with the way information about drugs used to treat the virus was communicated | D2. Age |
|---------------------------------------------------------------------------------------------------------------|---------------------|-------------------------------------------------------------------------------------------------|---------|
| B10 <sup>1</sup> . Satisfaction with the way information about drugs used to treat the virus was communicated | Pearson Correlation | 1                                                                                               | -.091*  |
|                                                                                                               | Sig. (2-tailed)     |                                                                                                 | .035    |
|                                                                                                               | N                   | 536                                                                                             | 536     |
|                                                                                                               | Pearson Correlation | -.091*                                                                                          | 1       |
| D2 <sup>2</sup> . Age                                                                                         | Sig. (2-tailed)     | .035                                                                                            |         |
|                                                                                                               | N                   | 536                                                                                             | 536     |

\*. Correlation is significant at the 0.05 level (2-tailed).

<sup>1</sup> B10- refers to the question 10 from the section B of the manuscript (Satisfaction with the way information about drugs used to treat the virus was communicated) section which refers to Perception about the authorities' communication process

<sup>2</sup>D2 - refers to question 2 from the D section of the manuscript (age), which refers to Sociodemographic characteristics of the respondents.

482

483           Moreover, when asked to evaluate the efficiency of the communication strategies  
484 adopted by authorities in order to send information about the virus, most respondents stated  
485 that the strategies were effective. Thus, the sum of the responses with negative valences shows  
486 that 144 of them (26, 9%) described the communication strategies as inefficient, while 266 of  
487 them (49, 6%) described them as efficient (S5\_ Tables with results to the 3<sup>rd</sup> research  
488 question\_Table 9). One interesting result of the analysis, was that, when trying to examine if  
489 the responses of the study participants about the efficiency of communication strategies differ  
490 depending on certain variables such as working unit, gender, working unit, living environment,  
491 the analysis found no differences between the responses of males and females, of people  
492 working in units without COVID – 19 patients and people not working in units with COVID – 19  
493 patients, or in people from the rural and urban area.

494 In the context of the information about drugs tested and used in the treatment against COVID –  
495 19, the results showed that students believe to a greater extent that such information was  
496 communicated in a coherent manner (M=4.05, SD=1.63), than the medical staff (M=3.79,  
497 SD=1.53) ( $t(534) = -2.05, p < 0.05$ ) (Table 10.). Hence, one possible explanation for this result  
498 would be that, due the experience and knowledge of the medical staff, people who were  
499 already working in the healthcare system, such people have greater expectations from  
500 authorities when it comes to sending medical information, than medical students.

501 **Table 10. Significant t test for information about drugs used to treat the virus and**  
 502 **professional degree**

|                                                                                                              | Group         | N   | Mean | S. D. | t     | df  | p   | t-test for Equality of Means |                       |           |       |
|--------------------------------------------------------------------------------------------------------------|---------------|-----|------|-------|-------|-----|-----|------------------------------|-----------------------|-----------|-------|
|                                                                                                              |               |     |      |       |       |     |     | Mean Difference              | Std. Error Difference | CI4 Lower | Upper |
| Information about drugs tested and used to treat the disease <sup>1</sup> _ Professional degree <sup>2</sup> | Medical staff | 294 | 3.79 | 1.53  | -2.05 | 534 | .03 | -.28                         | .13                   | -.55      | -.01  |
|                                                                                                              | Student       | 242 | 4.05 | 1.63  |       |     |     |                              |                       |           |       |

503 <sup>1</sup> The extent to which respondents believe that information about drugs tested and used to treat the virus  
 504 was communicated in a coherent manner  
 505 <sup>2</sup> Index variable from the professional degrees of respondents. Student: medical student and student at  
 506 university nursing program, Medical Staff: Senior specialist medical – doctor, Specialist medical – doctor,  
 507 Resident, Nurse with higher education diploma, Nurse with other studies than higher education  
 508

509 **(4) What is the perception of medical staff about the role of social**  
 510 **media in spreading misinformation about the virus?**

511  
 512 The results of the research revealed that respondents were inclined to believe more that social  
 513 media was a proper environment for spreading fake medical information during the pandemic.  
 514 By analyzing the information from S6 Tables with results to the 4<sup>th</sup> research question\_Table 11 ,  
 515 it can be observed that the sum of the responses with negative valences (4.5%) (to an  
 516 extremely little extent, to a very little extent and to a little extent) is much lower than the sum  
 517 of the responses with positive valences (89.9%) ( to an extremely great extent, to a very great  
 518 extent, to a great extent). Hence, most participants of the study believe that social media  
 519 platforms favored the transmission of fake medical news during the pandemic. Furthermore,  
 520 when trying to find differences in the responses of the participants depending on age, gender,  
 521 living environment, professional degree or working unit (with COVID – 19 patients or without

522 COVID – 19 patients), we observed that their responses did not differ depending on such  
523 variables. Thus, it can be inferred that, regardless of age, gender, living environment,  
524 professional degree or working unit, respondents’ perception was that social media had a role  
525 in spreading fake medical information.

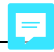

526  
527         However, even though respondents were of the opinion that social media was an  
528 environment in which was sent fake medical information, some of them still believe that social  
529 media platforms are appropriate for sending official information about the virus. Thus,  
530 considering the results from S6 Tables with results to the 4<sup>th</sup> research question\_Table 12 , the  
531 sum of responses with positive valences (40.3%) is almost equal to the sum of responses with  
532 negative valences (45.1%) meaning that the opinions of the study participants were divided  
533 when it comes to sending official information about the virus on social media.

534  
535         A factor which showed a weak but statistically significant influence on respondents’ opinion  
536 about sending COVID – 19 official information on social media was age. Hence, the results of  
537 the Pearson correlation ( $r(534) = -.175, p=0.000$ ), showed that as age decreases, the extent to  
538 which respondents believed that social media is an environment in which official information

539 about the virus should be communicated decreases (Table 13). In other words, younger  
 540 respondents believed to a greater extent than older respondents that official information  
 541 should also be communicated on social media. One possible explanation for this results would  
 542 be that young people gather most of their information from online sources, and they also  
 543 engage more with social media platforms, and thus it is possible that they would also like to see  
 544 official and important information on such platforms.

**Table 13. Person correlation between the extent to which social media represents an appropriate environment for sharing official COVID – 19 info and age**

|                                                                                                                               |                     | C1. The extent to which social media represents an appropriate environment for sharing official COVID – 19 info | D2. Age |
|-------------------------------------------------------------------------------------------------------------------------------|---------------------|-----------------------------------------------------------------------------------------------------------------|---------|
| C1 <sup>1</sup> . The extent to which social media represents an appropriate environment for sharing official COVID – 19 info | Pearson Correlation | 1                                                                                                               | -.175** |
|                                                                                                                               | Sig. (2-tailed)     |                                                                                                                 | .000    |
|                                                                                                                               | N                   | 536                                                                                                             | 536     |
|                                                                                                                               | Pearson Correlation | -.175**                                                                                                         | 1       |
| D2 <sup>2</sup> . Age                                                                                                         | Sig. (2-tailed)     | .000                                                                                                            |         |
|                                                                                                                               | N                   | 536                                                                                                             | 536     |

\*\* . Correlation is significant at the 0.01 level (2-tailed).

545 <sup>1</sup>C1 – refers to question 1 from the section C of the manuscript (The extent to which social media represents an  
 546 appropriate environment for sharing official COVID – 19 info), section which refers to Perception about the  
 547 communication of non- validated treatments

548 <sup>2</sup>D2 - refers to question 2 from the D section of the manuscript (age), which refers to Sociodemographic  
 549 characteristics of the respondents.

550 Furthermore, when dividing the study participants in medical staff (doctors, nurses) and  
 551 students (medical students or students at the university nursing programs), we found that  
 552 students (M=4.31, SD=2.11) believed to a greater extent than the medical staff (M= 3.88,  
 553 SD=2.07) that official information about the virus should also be sent on social media (t (534) = -

2.36,  $p < 0.05$ ) (Table 13). Next, when dividing the sample by living environment, participants living in the urban area ( $M=4.19$ ,  $SD=2.10$ ) were inclined more than those living in the rural area ( $M=3.72$ ,  $SD=2.05$ ), to believe that official information could also be sent on social media ( $t(534) = 2.23$ ,  $p < 0.05$ ) (Table 14).

**Table 14. Significant t tests for sharing official information on social media professional degree and living environment**

|                                                                         | Group         | N   | Mean | S. D. | t     | df  | p   | t-test for Equality of Means |                       |           |       |
|-------------------------------------------------------------------------|---------------|-----|------|-------|-------|-----|-----|------------------------------|-----------------------|-----------|-------|
|                                                                         |               |     |      |       |       |     |     | Mean Difference              | Std. Error Difference | Lower CI4 | Upper |
| Official information on social media _ Professional degree <sup>1</sup> | Medical staff | 294 | 3.88 | 2.07  | -2.36 | 534 | .01 | -.42                         | .18                   | -.78      | -.07  |
|                                                                         | Student       | 242 | 4.31 | 2.11  |       |     |     |                              |                       |           |       |
| Official information on social media _ living environment               | Urban area    | 411 | 4.19 | 2.10  | 2.23  | 534 | .02 | .47                          | .21                   | .05       | .89   |
|                                                                         | Rural area    | 125 | 3.71 | 2.05  |       |     |     |                              |                       |           |       |

<sup>1</sup>Index variable from the professional degrees of respondents. Student: medical student and student at university nursing program, Medical Staff: Senior specialist medical – doctor, Specialist medical – doctor, Resident, Nurse with higher education diploma, Nurse with other studies than higher education

**(5) What aspects of the professional activity of the medical staff were affected most by the COVID – 19 pandemic?**

The findings of our research showed that most respondents stated that the patient – doctor relationship was most affected by the pandemic (38.4%). However, a smaller percent of respondents declared that the working schedule was the most affected (26.9%), or the collaboration with their peers (23.9%) (S7 Tables with results to the 5<sup>th</sup> research question\_ Table 15 ).



573 Furthermore, taking into account the group of medical staff (doctors, nurses) and the group of  
574 students ( medical students and students at university nursing program), the results revealed  
575 that the most respondents who stated that the patient- doctor relationship was affected most  
576 by the pandemic was the group of medical staff (144 compared to 62) (S7 Tables with results to  
577 the 5<sup>th</sup> research question\_Table 16). One possible explanation for this result is that, by being in  
578 constant contact with their patients, doctors and nurses were more inclined to perceive that  
579 the relation with their patients has deteriorated during the pandemic.

580  
581  
582

## 583 Discussion

584 During the COVID – 19 pandemic, one of the major issues people had to face, was the spread of  
585 misinformation about the virus, its origins and its treatment. In this regard, we analyzed the  
586 perception of medical staff (including doctors, nurses, medical students and students in the  
587 university nursing program) about the way medical and non – medical information was  
588 communicated during the pandemic. In the context of the so called infodemic [11], and the  
589 effects of misinformation on people’s trust in doctors, most participants of our study declared  
590 that the information about alternative treatments for the virus affected the credibility of health  
591 professionals. Hence, from this point of view, our study is in line with previous studies which  
592 highlighted the fact that lately, trust in physician decreased [67], and which suggested that  
593 social media managed to determine people to trust the personal opinions of other people  
594 rather than the opinion of the professionals [61]. Furthermore, since other researchers pointed  
595 out that many medical practitioners used social media to express professional opinions that

596 were later found inaccurate [74], and thus they may have contributed to the spread of  
597 misinformation [75], we argue that the credibility of physicians might have also been affected  
598 by this type of behavior.

599         An interesting result of our research showed that as the age of medical staff decreases,  
600 the extent to which they believe that information about alternative treatments affects doctors'  
601 credibility increases. Hence, younger healthcare professionals believed to a greater extent than  
602 older healthcare professionals, that information about alternative treatments affected  
603 negatively people's trust in doctors. This results might have as possible explanation, the fact  
604 that younger people tend to spend more time on social media platforms, and they may have  
605 interacted more than older professionals, with misinformation about the virus, this making  
606 them more able to be aware of the negative effects of fake news. Moreover, the type of unit in  
607 which the respondents worked, was a factor which influenced the opinion of the respondents,  
608 our findings showing that, the medical staff who did not work in unit with COVID -19 patients,  
609 believed to a greater extent than those who worked in such units, that information about  
610 alternative treatments negatively influenced doctors' credibility. Given this result we argue that  
611 is it possible for those professionals who did not interact with COVID -19 patients, and who thus  
612 were more distant from the situation, to have a more distorted image regarding the way  
613 people's levels of trust in them changed in the context of the pandemic.

614         Considering the role of social media in spreading misinformation, our study is in line  
615 with previous studies which support the idea that such channels favored the communication of  
616 fake news during the pandemic [49, 50, 51]. In this regard, regardless of age, professional  
617 degree or living environment, most healthcare professionals who participated in our study were

618 of the opinion that social media contributed to the spread of misinformation. However, our  
619 study also showed that when it comes to communicating official information on social media,  
620 younger respondents (students) believed to a greater extent than older respondents (doctors,  
621 nurses), that such channels should be used to send official information about the virus. Taking  
622 into account these results, the fact that healthcare professionals acknowledge that social media  
623 favors the spread of misinformation, and that many of them still believe they should be used in  
624 order to communicate official information, shows that at personal level, professionals were not  
625 affected that much by misinformation, them being able to differentiate more easily between  
626 real and fake news. In other words, we argue that while people in general were negatively  
627 influenced by the fake news they read on social media, as it was shown in previous studies  
628 which highlighted that people trusted the information on social networks, they shared un-  
629 validated information and had trouble with differentiating real from fake news [57, 79] or that  
630 exposure to health misinformation may influence people's intention to engage in certain  
631 behaviors [80], healthcare professionals may be less influenced by fake news, due to their  
632 knowledge.

633         Considering the knowledge of medical staff about the type of drugs that had positive  
634 effects on treating the virus, the findings of the research showed that the respondents had  
635 opinions which were in line with the results found in other studies. Hence, according to the  
636 research, most respondents stated that the drug which was known to have positive effects  
637 against the virus was Dexamethasone (46.6%), it being followed by Remdesivir (40.5%). Thus,  
638 positive effects of Dexamethasone were also highlighted by studies [31, 32], while study [35]  
639 showed positive effects of Remdesivir. Moreover, during the period in which we conducted our

640 research, (April – June 2021), among the drugs which were approved for administration against  
641 the virus were Remdesivir, Tocilizumab – which was authorized first in June 2021, drugs which  
642 were also acknowledged by the respondents of our research. Even more, one of the authors of  
643 the article (L.R.) is a doctor and was directly involved in the process of taking care of COVID – 19  
644 patients, so the author can confirm that among the drugs which were in trial, or which were  
645 approved for administration against COVID-19 were also the drugs which were acknowledged  
646 by the respondents of our research.

647 In the context of medical staff's knowledge about alternative treatments, most  
648 respondents declared they had heard about the fact that alcohol can prevent the infection, that  
649 warm water drunk every 15 minutes, and the hot air from the hairdryer pointed to the nostrils  
650 can help eliminate the virus. From this point of view, our study is in line with a previous study  
651 [53], which also described these methods.

652 When it comes to the respondents' level of satisfaction about the way medical and non  
653 – medical information was communicated during the pandemic, generally, the research  
654 revealed that most respondents were dissatisfied with the communication process. In the case  
655 of communication strategies adopted by authorities, the results showed that most respondents  
656 were satisfied with them. However, in the context of sending information about the drugs used  
657 to treat the disease, the research showed that younger healthcare professionals were more  
658 satisfied with the communication process than older healthcare professionals. This results  
659 might be due to the fact that physicians with more experience have higher expectations from  
660 authorities than students.

661 Another area on which we focused our research was the professional activity of the  
662 medical staff during the pandemic. In this regard, our findings revealed that, according to the  
663 respondents of our study, the aspect that was mostly affected by the pandemic was the doctor-  
664 patient relationship. Hence, our research is in line with other studies [78], which showed that  
665 the pandemic affected the way doctors interacted with their patients.

666 Furthermore, on the basis of the results of our study we argue that not only the process  
667 of vaccination created ethical issues, but also the process of communication [81]. Thus, these  
668 ethical issues were perceived by the medical staff and they would require a further examination  
669 in order to be able to create communication guides which can be regarded as essential  
670 instruments not only for the research process of the medical staff and healthcare professionals  
671 with management positions, but also for their current medical activity [82,83].

## 672 **Conclusions**

673 During the pandemic, healthcare professionals did not have to deal only with challenges  
674 regarding their health and the health of their patients, but also with the problems created by  
675 the spread of medical misinformation. According to the main findings of our research, generally,  
676 the medical staff (doctors, nurses, medical students, students at university nursing program),  
677 believed that information about alternative treatments affected people's trust in doctors, but  
678 younger healthcare professionals and those working in units without COVID - 19 patients  
679 believed to a greater extent than older healthcare professionals and people working in units  
680 with COVID – 19 patients that fake news about treatments for the virus affected the credibility  
681 of doctors.

682 Furthermore, regardless of age, age, gender, living environment, professional degree or  
683 working unit, the medical staff acknowledged the role of social media in spreading fake news,  
684 but when it comes to using social media in order to communicate official information, younger  
685 healthcare professionals were more inclined to believe that such networks were appropriate  
686 for the communication of official information.

687 In the context of the drugs used to treat the virus, the results pointed out that the  
688 medical staff had knowledge about the drugs known to have positive effects in treating the  
689 virus, their perception being in line with previous studies which focused on this matter.

690 When it comes to the influence of the pandemic on the professional activity of the  
691 medical staff, the respondents declared that the aspect which was most affected was the  
692 doctor – patient relationship. In this regard, we argue that, by influencing peoples’ trust in  
693 doctors, the medical fake news spread during the pandemic, implicitly had a role in  
694 deteriorating the relation between doctors and their patients.

695 Therefore, the healthcare professionals were generally dissatisfied with the way medical  
696 and non – medical information was communicated during the pandemic, but younger  
697 professionals were satisfied than older professionals. Overall, the medical staff believed that  
698 fake news managed to undermine doctors’ credibility that social media platforms favor the  
699 spread of such news, and they had knowledge about the drugs which were known to have  
700 positive effects on the virus and about the alternative treatments.

701 Taking into account the results of the research, the paper has some theoretical and  
702 practical implications. From a theoretical point of view, the paper contributes to the literature  
703 on the matter of fake news and its influence on the trust of healthcare professionals, a strength

704 of the paper being the fact that it analyzed the opinions of medical staff (doctors, nurses,  
705 medical students and students at university nursing program). From a practical point of view,  
706 the paper brings awareness to the phenomenon of fake news regarding medical treatments  
707 and the negative influence it has on doctors' credibility. Another practical implication refers to  
708 the fact that the paper brings attention to the issue of using social media as a mean to  
709 communicate official information, many healthcare professionals, especially the younger ones,  
710 stating that such networks could be appropriate for sharing official information. Furthermore,  
711 by highlighting that the most affected aspect of the professional activity of doctors was the  
712 relationship with their patients, the study also shows that actions need to be taken in order to  
713 restore people's trust in doctors and improve the process of communication between them.

714

## 715 **Limitations and future research directions**

716 While our study proved relevant information regarding the perception of healthcare  
717 professionals about the way medical and non – medical information was communicated in time  
718 of the pandemic, it also has some limitations.

719 One limitation is represented by the fact that the perception of healthcare professionals  
720 was studied only by using quantitative methods. In this regard, a future research should focus  
721 on obtaining information from doctors while using qualitative methods too. Next, the study was  
722 conducted only on Romanian healthcare professionals, and thus, a future research should take  
723 into consideration a comparison between the opinions of professionals from different  
724 countries. Another limitation is represented by the fact that we only asked respondents to state  
725 the aspect which was most influenced by the pandemic, but we did not asked them to offer

726 detail about other type of challenges encountered. Thus, a future research should focus on  
727 analyzing the extent to which aspects of the professional activity of doctors were affected, and  
728 on analyzing more deeply the challenges they had to face during the pandemic.

729         Furthermore, since our research revealed that many respondents believed that social  
730 media platforms could be appropriate for sharing official information, we draw attention to a  
731 problem that can arise in this context. Since people know that such platforms favor the spread  
732 of fake news, if we encourage the use of social media in order to communicate official  
733 information, don't we risk to discredit that information as it is possible for people to consider  
734 that such information is fake too? We believe that this issue should be taken into account and  
735 studied in a future research.

## 736 **Author Contributions**

737 Conceptualization: Claudiu Coman, Maria Cristina Bularca

738 Data curation: Claudiu Coman, Liliana Rogoza, Angela Repanovici, Maria Cristina Bularca

739 Formal analysis: Maria Cristina Bularca, Claudiu Coman

740 Investigation: Claudiu Coman, Maria Cristina Bularca, Angela Repanovici, Liliana Rogoza

741 Methodology: Maria Cristina Bularca, Claudiu Coman

742 Project administration: Claudiu Coman, Liliana Rogoza, Angela Repanovici

743 Resources: Maria Cristina Bularca, Liliana Rogoza, Angela Repanovici

744 Supervision: Claudiu Coman, Liliana Rogoza, Angela Repanovici

745 Writing – original draft: Maria Cristina Bularca, Claudiu Coman



746 Writing – review & editing: Maria Cristina Bularca, Claudiu Coman, Liliana Rogozea, Angela  
747 Repanovici

748

749

750

## 751 **References**

752 **1.** Sanders JM, Monogue ML, Jodlowski TZ, Cutrell J. B.Pharmacologic Treatments for  
753 Coronavirus Disease 2019 (COVID-19): A Review. JAMA. 2020; 323(18):1824–1836.  
754 doi:10.1001/jama.2020.6019

755 **2.** Shereen MA, Khan S, Kazmi A, Bashir N, Siddique R. COVID-19 infection: Origin, transmission,  
756 and characteristics of human coronaviruses. J Adv Res. 2020; 24:91-98 doi:  
757 10.1016/j.jare.2020.03.005

758 **3.** Kristina SA, Herliana N, Hanifah S. The perception of role and responsibilities during covid-19  
759 pandemic: A survey from Indonesian pharmacists. Int J Pharm Res , 2020; 12(2). doi:  
760 10.31838/ijpr/2020.SP2.369

761 **4.** World Health Organization (WHO). Timeline of WHO’s response to COVID-19. [Internet].  
762 World Health Organization. 2020 June 29 [cited 2020 Nov 27] Available from:  
763 <https://www.who.int/news/item/29-06-2020-covidtimeline>

764 **5.** European Centre for Disease Prevention and Control. COVID-19 situation update worldwide,  
765 as of 27 November 2020 [Internet]. European Centre for Disease Prevention and Control. 2020  
766 June 29 [cited 2021 Nov 25] Available from: [https://www.ecdc.europa.eu/en/geographical-](https://www.ecdc.europa.eu/en/geographical-distribution-2019-ncov-cases)  
767 [distribution-2019-ncov-cases.](https://www.ecdc.europa.eu/en/geographical-distribution-2019-ncov-cases)

- 768 **6.** British Broadcasting Corporation. COVID vaccine: First 'milestone' vaccine offers 90%  
769 protection. [Internet]. 2020 Nov 9 [cited 2020 Nov 27] Available from:  
770 <https://www.bbc.com/news/health-54873105>.
- 771 **7.** Kommenda N, Jones FH. COVID vaccine tracker: when will a coronavirus vaccine be ready?  
772 [Internet]. The Guardian. 2020 Nov 10 [cited 2020 Nov 27] Available from:  
773 [https://www.theguardian.com/world/ng-interactive/2020/nov/10/covid-vaccine-tracker-when-](https://www.theguardian.com/world/ng-interactive/2020/nov/10/covid-vaccine-tracker-when-will-a-coronavirus-vaccine-be-ready)  
774 [will-a-coronavirus-vaccine-be-ready](https://www.theguardian.com/world/ng-interactive/2020/nov/10/covid-vaccine-tracker-when-will-a-coronavirus-vaccine-be-ready)
- 775 **8.** Ahsan W, Javed S, Al Bratty M, Alhazmi HA, Najmi A. Treatment of SARS-CoV-2: How far have  
776 we reached? *Drug Discov Ther.* 2020; 14(2):67-72. doi: 10.5582/ddt.2020.03008
- 777 **9.** Kupferschmidt K, Cohen J. Race to find COVID-19 treatments accelerates. *Science.* 2020;  
778 367(6485): 1412-1413. doi: 10.1126/science.367.6485.1412
- 779 **10.** World Health Organization (WHO). Solidarity clinical trial for COVID-19 treatments  
780 [Internet]. World Health Organization 2019. [cited 2020 Nov 27] Available from:  
781 [https://www.who.int/emergencies/diseases/novel-coronavirus-2019/global-research-on-novel-](https://www.who.int/emergencies/diseases/novel-coronavirus-2019/global-research-on-novel-coronavirus-2019-ncov/solidarity-clinical-trial-for-covid-19-treatments)  
782 [coronavirus-2019-ncov/solidarity-clinical-trial-for-covid-19-treatments](https://www.who.int/emergencies/diseases/novel-coronavirus-2019/global-research-on-novel-coronavirus-2019-ncov/solidarity-clinical-trial-for-covid-19-treatments)
- 783 **11.** Zarocostas J. How to fight an infodemic. *The Lancet.* 2020; 395(10225):676. doi:  
784 10.1016/S0140-6736(20)30461-X
- 785 **12.** Tuccori M, Convertino I, Ferraro S, Cappello E, Valdiserra G, Focosi D et al. The Impact of the  
786 COVID-19 “Infodemic” on Drug-Utilization Behaviors: Implications for Pharmacovigilance. *Drug*  
787 *Saf.* 2020;43:699–709 doi:10.1007/s40264-020-00965-w
- 788 **13.** Rosa SGV, Santos WC. Clinical trials on drug repositioning for COVID-19 treatment. *Rev*  
789 *Panam Salud Publica.* 2020; 44: e40 doi: 10.26633/RPSP.2020.40

790 **14.** Sahraei Z, Shabani M, Shokouhi S, Saffaei A. Aminoquinolines against coronavirus disease  
791 2019 (COVID-19): chloroquine or hydroxychloroquine. *Int J Antimicrob Agents*. 2020;  
792 105945(10.1016) doi:10.1016/j.ijantimicag.2020.105945

793 **15.** White NJ, Watson JA, Hoglund RM, Chan XHS, Cheah PY, Tarning J. COVID-19 prevention  
794 and treatment: A critical analysis of chloroquine and hydroxychloroquine clinical pharmacology.  
795 PLoS Med. 2020; 17(9): e1003252. doi:10.1371/journal.pmed.1003252

796 **16.** Liu J, Cao R, Xu M, Wang X, Zhang H, Hu H. et al. Hydroxychloroquine, a less toxic derivative  
797 of chloroquine, is effective in inhibiting SARS-CoV-2 infection in vitro. *Cell Discov*. 2020; 6(16)  
798 doi:10.1038/s41421-020-0156-0 .

799 **17.** Wang M, Cao R, Zhang L, Yang X, Liu J, Xu M. et.al. Remdesivir and chloroquine effectively  
800 inhibit the recently emerged novel coronavirus (2019-nCoV) in vitro. *Cell Res*. 2020; 30:269–  
801 271. doi:10.1038/s41422-020-0282-0

802 **18.** Davidescu EI, Odajiu I, Bunea T, Sandu G, Stratan L, Aramă V. et.al. Treatment with  
803 hydroxychloroquine in patients with covid-19. Experience of a neurology  
804 department. *Farmacia*. 2020; 68(4): 597-605. doi:10.31925/farmacia.2020.4.3

805 **19.** Gautret P, Lagier JC, Parola P, Meddeb L, Mailhe M, Doudier B. et.al. Hydroxychloroquine  
806 and azithromycin as a treatment of COVID-19: results of an open-label non-randomized clinical  
807 trial. *Int. J. Antimicrob. Agents*. 2020; 105949. doi:10.1016/j.ijantimicag.2020.105949.

808 **20.** Thomson K, Nachlis H. Emergency Use Authorizations During the COVID-19  
809 Pandemic: Lessons From Hydroxychloroquine for Vaccine Authorization and  
810 Approval. *JAMA*. 2020; 324(13):1282–1283. doi:10.1001/jama.2020.16253.

- 811 **21.** U.S Food & Drug Administration. FDA cautions against use of hydroxychloroquine or  
812 chloroquine for COVID-19 outside of the hospital setting or a clinical trial due to risk of heart  
813 rhythm problems. [Internet]. Food and Drug Administration. 2020 Jul 1 [cited 2020 Nov 27]  
814 Available from: [https://www.fda.gov/drugs/drug-safety-and-availability/fda-cautions-against-](https://www.fda.gov/drugs/drug-safety-and-availability/fda-cautions-against-use-hydroxychloroquine-or-chloroquine-covid-19-outside-hospital-setting-or)  
815 [use-hydroxychloroquine-or-chloroquine-covid-19-outside-hospital-setting-or](https://www.fda.gov/drugs/drug-safety-and-availability/fda-cautions-against-use-hydroxychloroquine-or-chloroquine-covid-19-outside-hospital-setting-or).
- 816 **22.** Recovery. No clinical benefit from use of hydroxychloroquine in hospitalized patients with  
817 COVID-19. [Internet]. Recovery 2020 June 5 [cited 2020 Nov 27] Available from:  
818 [https://www.recoverytrial.net/news/statement-from-the-chief-investigators-of-the-](https://www.recoverytrial.net/news/statement-from-the-chief-investigators-of-the-randomised-evaluation-of-covid-19-therapy-recovery-trial-on-hydroxychloroquine-5-june-2020-no-clinical-benefit-from-use-of-hydroxychloroquine-in-hospitalised-patients-with-covid-19)  
819 [randomised-evaluation-of-covid-19-therapy-recovery-trial-on-hydroxychloroquine-5-june-2020-](https://www.recoverytrial.net/news/statement-from-the-chief-investigators-of-the-randomised-evaluation-of-covid-19-therapy-recovery-trial-on-hydroxychloroquine-5-june-2020-no-clinical-benefit-from-use-of-hydroxychloroquine-in-hospitalised-patients-with-covid-19)  
820 [no-clinical-benefit-from-use-of-hydroxychloroquine-in-hospitalised-patients-with-covid-19](https://www.recoverytrial.net/news/statement-from-the-chief-investigators-of-the-randomised-evaluation-of-covid-19-therapy-recovery-trial-on-hydroxychloroquine-5-june-2020-no-clinical-benefit-from-use-of-hydroxychloroquine-in-hospitalised-patients-with-covid-19).
- 821 **23.** Naveed M, Uddin S, Abdullah KS, Ishaq SE, Ahmad T. Various Evidence-Based Hypothetical  
822 and Experimental Treatment Approaches and Their Effectiveness against COVID-19 Worldwide:  
823 A Comprehensive Literature Review. *EJMO* 2020; 4(4):265–285. doi:  
824 10.14744/ejmo.2020.52538
- 825 **24.** Chu C M, Cheng VCC, Hung IFN, Wong MML, Chan KH, Chan KS, et.al. Role of  
826 lopinavir/ritonavir in the treatment of SARS: initial virological and clinical findings. *Thorax*.  
827 2004; 59(3):252-256. doi:10.1136/thorax.2003.012658
- 828 **25.** Cao B, Wang Y, Wen D, Liu W, Wang J, Fan G, et al. A trial of lopinavir-ritonavir in adults  
829 hospitalized with severe covid-19. *N. Engl . J. Med.* 2020; 382(19): 1787-1799.  
830 doi:10.1056/NEJMoa2001282

831 **26.** Vosu J, Britton P, Howard-Jones A, Isaacs D, Kesson A, Khatami A, et al. Is the risk of  
832 ibuprofen or other non-steroidal anti-inflammatory drugs increased in COVID-19?. *J Paediatr*  
833 *Child Health*. 2020; 56(10): 1645-1646. doi:10.1111/jpc.15159

834 **27.** Fang L, Karakiulakis G, Roth M. Are patients with hypertension and diabetes mellitus at  
835 increased risk for COVID-19 infection? *Lancet Respir Med*. 2020; 8(4):e21.8 doi:10.1016/S2213-  
836 2600(20)30116-8

837 **28.** Science alert. Updated: WHO Now Doesn't Recommend Avoiding Ibuprofen For COVID-19  
838 Symptoms [Internet]. Science alert 2020 Mar 17 [cited 2020 Nov 27]. Available from:  
839 [https://www.sciencealert.com/who-recommends-to-avoid-taking-ibuprofen-for-covid-19-](https://www.sciencealert.com/who-recommends-to-avoid-taking-ibuprofen-for-covid-19-symptoms)  
840 [symptoms](https://www.sciencealert.com/who-recommends-to-avoid-taking-ibuprofen-for-covid-19-symptoms)

841 **29.** Esba LCA, Alqahtani RA, Thomas A, Shamas N, Alswaidan L, Mardawi G. Ibuprofen and  
842 NSAID Use in COVID-19 Infected Patients Is Not Associated with Worse Outcomes: A  
843 Prospective Cohort Study. *Infect Dis Ther*. 2020; 1-16. doi:10.1007/s40121-020-00363-w

844 **30.** Rinott E, Kozer E, Shapira Y, Bar-Haim A, Youngster I. Ibuprofen use and clinical outcomes in  
845 COVID-19 patients. *Clin Microbiol Infect*. 2020; 26(9):1259.e5-1259.e7.  
846 doi:10.1016/j.cmi.2020.06.003

847 **31.** Roberts M. Coronavirus: Dexamethasone proves first life-saving drug. [Internet]. British  
848 Broadcasting Corporation 2020 June 16 [cited 2020 Nov 27] Available from:  
849 <https://www.bbc.com/news/health-53061281>.

850 **32.** Horby P, Lim WS, Emberson JR, Mafham M, Bell JL, Linsell L, et al.. Dexamethasone in  
851 hospitalized patients with Covid-19-preliminary report. *N. Engl. J. Med*. 2020.  
852 doi:10.1056/nejmoa2021436

- 853 **33.** Lu CC, Chen MY, Lee WS, Chang YL. Potential therapeutic agents against COVID-19: What we  
854 know so far. *J Chin Med Assoc.* 2020; 83(6):534-536. doi: 10.1097/JCMA.0000000000000318
- 855 **34.** Wang Y, Zhang D, Du G, Du R, Zhao J, Jin Y, et al. Remdesivir in adults with severe COVID-19:  
856 a randomised, double-blind, placebo-controlled, multicentre trial. *The Lancet.* 2020;  
857 395(10236):1569-1578. doi:10.1016/S0140-6736(20)31022-9
- 858 **35.** Beigel JH, Tomashek KM, Dodd LE, Mehta AK, Zingman BS, Kalil AC. et al. Remdesivir for the  
859 treatment of Covid-19. *N. Engl. J. Med.* 2020.  
860 <https://www.nejm.org/doi/10.1056/NEJMoa2007764>
- 861 **36.** U.S Food and Drug Administration. FDA Approves First Treatment for COVID-19 [Internet].  
862 Food and Drug Administration 2020 Oct 22 [cited 2020 Nov 27] Available from:  
863 [https://www.fda.gov/news-events/press-announcements/fda-approves-first-treatment-covid-](https://www.fda.gov/news-events/press-announcements/fda-approves-first-treatment-covid-19)  
864 [19](https://www.fda.gov/news-events/press-announcements/fda-approves-first-treatment-covid-19).
- 865 **37.** U.S Food and Drug Administration. Coronavirus (COVID-19) Update: November 20, 2020  
866 [Internet]. Food and Drug Administration 2020 Nov 20 [cited 2020 Nov 27] Available from:  
867 [https://www.fda.gov/news-events/press-announcements/coronavirus-covid-19-update-](https://www.fda.gov/news-events/press-announcements/coronavirus-covid-19-update-november-20-2020)  
868 [november-20-2020](https://www.fda.gov/news-events/press-announcements/coronavirus-covid-19-update-november-20-2020).
- 869 **38.** Glasdam S, Stjernswärd S. Information about the COVID-19 pandemic—a thematic analysis of  
870 different ways of perceiving true and untrue information. *SSHOP.* 2020; (2)1: 100090.  
871 <https://doi.org/10.1016/j.ssaho.2020.100090>
- 872 **39.** Caleb TC, Hayes RA. Social Media: Defining, Developing, and Divining. *Atl J Commun.*2015;  
873 23:1: 46-65. <https://doi.org/10.1080/15456870.2015.972282>

874 **40.** Boyd DM, Ellison NB. Social network sites: Definition, history, and scholarship. *J Comput*  
875 *Mediat Commun.* 2007; 13(1): 210-230. <https://doi.org/10.1111/j.1083-6101.2007.00393.x>

876 **41.** Reuter C, Stieglitz S, Imran M. Social media in conflicts and crises *Behav. Inf. Technol.*  
877 2020; 39(3): 241-251. <https://doi.org/10.1080/0144929X.2019.1629025>

878 **42.** Vasconcellos-Silva PR, Castiel LD. COVID-19, fake news, and the sleep of communicative  
879 reason producing monsters: the narrative of risks and the risks of narratives. *Cad Saude Publica.*  
880 2020); 36(7): e00101920. <https://doi.org/10.1590/0102-311x00101920>

881 **43.** Pulido CM, Ruiz-Eugeni L, Redondo-Sama G, Villarejo-Carballido B. A New Application of  
882 Social Impact in Social Media for Overcoming Fake News in Health. *Int. J. Environ. Res. Public*  
883 *Health.* 2020; 17(7):2430. <https://doi.org/10.3390/ijerph17072430>

884 **44.** Al-Dmour H, Salman A, Abuhashesh M, Al-Dmour R. Influence of social media platforms on  
885 public health protection against the COVID-19 pandemic via the mediating effects of public  
886 health awareness and behavioral changes: integrated model. *J. Medical Internet Res.*  
887 2020; 22(8):e19996.

888 **45.** Wong JEL, Leo YS, Tan CC. COVID-19 in Singapore—Current Experience: Critical Global Issues  
889 That Require Attention and Action. *JAMA.* 2020; 323(13):1243–  
890 1244. doi:10.1001/jama.2020.2467

891 **46.** Lazer DM, Baum MA, Benkler Y, Berinsky AJ, Greenhill KM, Menczer F, et al. The science of  
892 fake news. *Science.* 2018; 359(6380):1094-1096. DOI: 10.1126/science.aao2998

893 **47.** Moscadelli A, Albora G, Biamonte MA, Giorgetti D, Innocenzio M, Paoli S, et al. Fake News  
894 and Covid-19 in Italy: Results of a Quantitative Observational Study. *Int. J. Environ. Res. Public*  
895 *Health.* 2020; 17:5850

- 896 **48.** Mian A, Khan S. Coronavirus: The spread of misinformation. *BMC Medicine*. 2020; 18(1):1-2  
897 doi:10.1186/s12916-020-01556-3 \
- 898 **49.** Pan American Health Organization. Understanding the infodemic and misinformation in the  
899 fight against covid-19. [Internet]. Pan American Health Organization 2020 May 1 [cited 2020  
900 Nov 27] Available from: [https://www.paho.org/en/documents/understanding-infodemic-and-](https://www.paho.org/en/documents/understanding-infodemic-and-misinformation-fight-against-covid-19)  
901 [misinformation-fight-against-covid-19](https://www.paho.org/en/documents/understanding-infodemic-and-misinformation-fight-against-covid-19).
- 902 **50.** Bowles J, Larreguy H, Liu, S. Countering misinformation via WhatsApp: Preliminary evidence  
903 from the COVID-19 pandemic in Zimbabwe. *PloS one*. 2020; 15(10): e0240005.  
904 <https://doi.org/10.1371/journal.pone.0240005>
- 905 **51.** Ittefaq M, Hussain SA, Fatima M. COVID-19 and social-politics of medical misinformation on  
906 social media in Pakistan. *Media Asia*. 2020; 47(1-2): 75-80.  
907 <https://doi.org/10.1080/01296612.2020.1817264>
- 908 **52.** The National Law Review. There's a Fake News Pandemic. Could COVID-19 and Trademarks  
909 be the Cure? [Internet]. The National Law Review 2020 Jul 7 [cited 2020 Nov 27] Available from:  
910 [https://www.natlawreview.com/article/there-s-fake-news-pandemic-could-covid-19-and-](https://www.natlawreview.com/article/there-s-fake-news-pandemic-could-covid-19-and-trademarks-be-cure)  
911 [trademarks-be-cure](https://www.natlawreview.com/article/there-s-fake-news-pandemic-could-covid-19-and-trademarks-be-cure)
- 912 **53.** O'connor C, Murphy M. Going Viral: Doctors Must Combat Fake News in the Fight against  
913 Covid-19. *Ir Med J*. 2020; 113(5): 85-85.
- 914 **54.** Pew Research Center. Nearly three-in-ten Americans believe COVID-19 was made in a lab.  
915 [Internet]. Pew research center 2020 April 8 [cited 2020 Nov 27] Available from:  
916 [https://www.pewresearch.org/fact-tank/2020/04/08/nearly-three-in-ten-americans-believe-](https://www.pewresearch.org/fact-tank/2020/04/08/nearly-three-in-ten-americans-believe-covid-19-was-made-in-a-lab/)  
917 [covid-19-was-made-in-a-lab/](https://www.pewresearch.org/fact-tank/2020/04/08/nearly-three-in-ten-americans-believe-covid-19-was-made-in-a-lab/)



- 918 **55.** Health Analytics Asia. 50 Fake ‘frequently forwarded’ COVID-19 WhatsApp messages.  
919 [Internet]. Health Analytics Asia 2020 April 2 [cited 2020 Nov 27] Available from:  
920 <https://www.ha-asia.com/50-fake-frequently-forwarded-covid-19-whatsapp-messages/>
- 921 **56.** Brennen JS, Simon F, Howard PN, Nielsen RK. Types, sources, and claims of COVID-19  
922 misinformation. *Reuters Institute*. 2020; 7: 1-13.
- 923 **57.** Pennycook G, McPhetres J, Zhang Y, Lu JG, Rand DG. Fighting COVID-19 misinformation on  
924 social media: Experimental evidence for a scalable accuracy-nudge intervention. *Psychol*.  
925 2020; 31(7): 770-780. <https://doi.org/10.1177/0956797620939054>
- 926 **58.** Barua Z, Barua S, Aktar S, Kabir N, Li M. Effects of misinformation on COVID-19 individual  
927 responses and recommendations for resilience of disastrous consequences of  
928 misinformation. *Prog Disaster Science*. 2020; 8: 100119. doi:10.1016/j.pdisas.2020.100119
- 929 **59.** Ahmed N, Shahbaz T, Shamim A, Khan KS, Hussain SM, Usman A. The COVID-19 Infodemic:  
930 A Quantitative Analysis Through Facebook. *Cureus*. 2020; 12(11): e11346. doi:  
931 10.7759/cureus.11346
- 932 **60.** Nagler RH, Vogel RI, Gollust SE, Rothman AJ, Fowler EF, Yzer MC. Public perceptions of  
933 conflicting information surrounding COVID-19: Results from a nationally representative survey  
934 of US adults. *PLoS one*. 2020; 15(10): e0240776. doi:10.1371/journal.pone.0240776
- 935 **61.** Orso D, Federici N, Copetti R, Vetrugno L, Bove T. Infodemic and the spread of fake news in  
936 the COVID-19-era. *Eur J Emerg Med*. 2020; 27(5):327-328. doi:10.1097/MEJ.0000000000000713
- 937 **62.** McNab C. What social media offers to health professionals and citizens. *Bull World Health*  
938 *Organ*. 2009; 87(8):566. doi:10.2471/blt.09.066712

- 939 **63.** Ma X, Vervoort D, Luc JG. When misinformation goes viral: access to evidence-based  
940 information in the COVID-19 pandemic. *J. Glob. Health. Sci.* 2020; 2(1):e13  
941 doi:10.35500/jghs.2020.2.e13
- 942 **64.** Tasnim S, Hossain MM, Mazumder H. Impact of rumors and misinformation on COVID-19 in  
943 social media. *J Prev Med Public Health.* 2020; 53(3):171-174.
- 944 **65.** Bode L, Vraga EK. See something, say something: Correction of global health misinformation  
945 on social media. *J Health Commu.* 2018; 33(9):1131-1140.  
946 doi:10.1080/10410236.2017.1331312
- 947 **66.** Chou WYS, Oh A, Klein WM. Addressing health-related misinformation on social  
948 media. *Jama.* 2018; 320(23): 2417-2418. doi:10.1001/jama.2018.16865.
- 949 **67.** Stasiuk K, Polak M, Dolinski D, Maciuszek J. The credibility of health information sources as  
950 predictors of attitudes toward vaccination—the results from a longitudinal study in  
951 Poland. *Vaccines.* 2021; 9(8):933 doi: 10.3390/vaccines9080933
- 952 **68.** Cernicova-Buca M, Palea A. An appraisal of communication practices demonstrated by  
953 romanian district public health authorities at the outbreak of the COVID-19  
954 pandemic. *Sustainability.* 2021; 13(5): 1-19, doi: 10.3390/su13052500
- 955 **69.** Tagliacozzo S, Albrecht F, Ganapati NE. International Perspectives on COVID-19  
956 Communication Ecologies: Public Health Agencies' Online Communication in Italy, Sweden, and  
957 the United States. *Am Behav Sci.* 2021; 65(7), 934-955 doi: 10.1177/0002764221992832
- 958 **70.** Saechang O, Yu J, Li Y. Public trust and policy compliance during the COVID-19 pandemic:  
959 The role of professional trust. *Healthcare.* 2021; 9 (2):1-13 doi: 10.3390/healthcare9020151.

960 **71.** Lewandowski R, Goncharuk AG, Cirella GT. Restoring patient trust in healthcare: medical  
961 information impact case study in Poland. *BMC Health Serv. Res.* 2021; 21(1):1-11 doi:  
962 10.1186/s12913-021-06879-2

963 **72.** Soveri A, Karlsson LC, Antfolk J, Lindfelt M, Lewandowsky S. Unwillingness to engage in  
964 behaviors that protect against COVID-19: the role of conspiracy beliefs, trust, and endorsement  
965 of complementary and alternative medicine. *BMC Public Health.* 2021; 21(1): 1-12 doi:  
966 10.1186/s12889-021-10643-w

967 **73.** Antinyan A, Bassetti T, Corazzini L, Pavesi F. Trust in the health system and COVID-19  
968 treatment. *Front. Psychol.* 2021; 12:1-14 doi:10.3389/fpsyg.2021.643758

969 **74.** Law RW, Kanagasingam S, Choong KA. Sensationalist social media usage by doctors and  
970 dentists during Covid-19. *Digit. Health.* 2021; 7:1-12 doi: 10.1177/20552076211028034

971 **75.** Leonard MB, Pursley DM, Robinson LA, Abman SH, Davis JM. The importance of  
972 trustworthiness: lessons from the COVID-19 pandemic. *Pediatr. Res.* 2021; 1-4  
973 doi:10.1038/s41390-021-01866-z

974 **76.** Wood JL, Lee GY, Stinnett SS, Southwell BG. A Pilot Study of Medical Misinformation  
975 Perceptions and Training Among Practitioners in North Carolina (USA). *INQUIRY: The Journal of*  
976 *Health Care Organization, Provision, and Financing,* 2021; 58:1-6 doi:  
977 10.1177/00469580211035742

978 **77.** Gopichandran V, Sakthivel K. Doctor-patient communication and trust in doctors during  
979 COVID 19 times—A cross sectional study in Chennai, India. *Plos One.* 2021: 16(6), 1-11 doi:  
980 10.1371/journal.pone.0253497

981 **78.** Nwoga HO, Ajuba, MO, Ezeoke UE. Effect of COVID-19 on doctor-patient relationship. *Int J*  
982 *Community Med Public Health.* 2020; 7(12): 2394-6040, doi: 10.18203/2394-  
983 6040.ijcmph20205136

984 **79.** Rocha YM, de Moura GA, Desidério GA, de Oliveira CH, Lourenço FD, de Figueiredo NLD. The  
985 impact of fake news on social media and its influence on health during the COVID-19 pandemic:  
986 A systematic review. *J. Public Health.* 2021; 1-10 doi:10.1007/s10389-021-01658-z

987 **80.** Greene CM, Murphy G. Quantifying the effects of fake news on behavior: Evidence from a  
988 study of COVID-19 misinformation. *J Exp Psychol Appl.* 2021 Dec;27(4):773-784. doi:  
989 10.1037/xap0000371.**81.**Rogozea LM, Sechel G, Bularca MC, Coman C, Cocuz ME. Who's  
990 Getting Shots First? Dealing With the Ethical Responsibility for Prioritizing Population Groups in  
991 Vaccination. *Am J Ther.* 2021 Jun 22;28(4):e478-e487. doi: 10.1097/MJT.0000000000001400.  
992 PMID: 34228653.

993 **82.** Rogozea L, Purcaru D, Leașu F, Nemet C. Biomedical research - opportunities and ethical  
994 challenges. *Rom J Morphol Embryol.* 2014;55(2 Suppl):719-22. PMID: 25178352.

995 **83.** Olimid AP, Rogozea LM, Olimid DA. Ethical approach to the genetic, biometric and health  
996 data protection and processing in the new EU General Data Protection Regulation (2018). *Rom J*  
997 *Morphol Embryol.* 2018;59(2):631-636. PMID: 30173275.

## 998 **Supporting information**

- 999 S1 Appendix English version of the questionnaire  
1000 (docx)
- 1001 S2 Appendix Romanian version of the questionnaire  
1002 (docx)

- 1003 S3 Tables with results to the 1<sup>st</sup> research question
- 1004 S4 Tables with results to the 2<sup>nd</sup> research question\_
- 1005 S5 Tables with results to the 3<sup>rd</sup> research question\_
- 1006 S6 Tables with results to the 4<sup>th</sup> research question\_
- 1007 S7 Tables with results to the 5<sup>th</sup> research question\_



Click here to access/download

**Supporting Information - Compressed/ZIP File Archive**  
Supporting information\_revised manuscript.zip



1 ~~Challenges in the communication process during the COVID-19 pandemic – a perspective of~~  
2 ~~medical staff~~ Misinformation about medication during the COVID – 19 pandemic: a perspective  
3 of medical staff  
4

5 Claudiu Coman<sup>1#a\*</sup>, Maria Cristina Bularca<sup>1</sup>, Angela Repanovici<sup>2</sup>, Liliana Rogozea<sup>3</sup>

6 1 Department of Social Sciences and Communication, Faculty of Sociology and Communication,  
7 Transilvania University of Brasov, Brasov, Romania;

8 2 Department of Product Design, Mechatronics and Environment, Faculty of Product Design and  
9 Environment, Transilvania University of Brasov, Brasov, Romania

10 3 Basic, Preventive and Clinical Sciences Department, Transilvania University of Brasov, Brasov,  
11 Romania;

12  
13 <sup>#a</sup> Current address: Department of Social Sciences and Communication, Faculty of Sociology and  
14 Communication, Transilvania University of Braşov, Brasov, România

15  
16 \* Corresponding author

17 E-mail: [claudiu.coman@unitbv.ro](mailto:claudiu.coman@unitbv.ro) (CC)

18

19

20

21

22

23

24

## 25 **Abstract**

26 ~~Background. Healthcare professionals had to face numerous challenges during the pandemic,~~  
27 ~~their professional activity being influenced not only by the virus, but also by the spread of~~  
28 ~~medical misinformation. In this regard, we aimed to analyze, from the perspective of medical~~  
29 ~~staff, the way medical and non-medical information about the virus was communicated during~~  
30 ~~the pandemic in order to raise awareness about the way misinformation affected the medical~~  
31 ~~staff.~~

32 ~~Methods and findings. The study was conducted on Romanian healthcare professionals~~  
33 ~~including doctors, nurses and medical students. They were asked to answer to a questionnaire~~  
34 ~~and the sample of the research includes 536 respondents. The findings revealed that most~~  
35 ~~respondents stated that information about alternative treatments against the virus affected the~~  
36 ~~credibility of health professionals, and that younger professionals believed to a greater extent~~  
37 ~~that trust in doctors was affected. The research also showed that respondents were well~~  
38 ~~informed about the drugs used in clinical trials in order to treat the virus, and that younger~~  
39 ~~respondents believed that social media should be used to send official information. Among the~~  
40 ~~main limitations of our study we mention the fact that we used only quantitative methods and~~  
41 ~~the fact we focused only on Romanian healthcare professionals.~~

42 ~~Conclusions. Healthcare professionals declared that the spread of misinformation regarding~~  
43 ~~alternative treatments, affected their credibility and the relationship with their patients.~~  
44 ~~Healthcare professionals had knowledge about the drugs used in clinical trials, and they~~  
45 ~~acknowledged the role of social media in spreading medical misinformation. However, younger~~



46 ~~professionals also believed that social media could be used to share official information about~~  
47 ~~the virus. A future research should focus on studying the opinion of Romanian and international~~  
48 ~~doctors, it should use qualitative methods too and should address the issue of social media~~  
49 ~~being an appropriate environment for sending official information.~~

50 Background. Healthcare professionals had to face numerous challenges during the pandemic,  
51 their professional activity being influenced not only by the virus, but also by the spread of  
52 medical misinformation. In this regard, we aimed to analyze, from the perspective of medical  
53 staff, the way medical and non - medical information about the virus was communicated during  
54 the pandemic to encourage the development of future research or interventions in order to  
55 raise awareness about the way misinformation affected medical staff.

56 Methods and findings. The study was conducted on Romanian healthcare professionals. They  
57 were asked to answer to a questionnaire and the sample of the research includes 536  
58 respondents. The findings revealed that most respondents stated that information about  
59 alternative treatments against the virus affected the credibility of health professionals, and that  
60 younger professionals believed to a greater extent that trust in doctors was affected. The  
61 research also showed that respondents were well informed about the drugs used in clinical  
62 trials in order to treat the virus.

63 Conclusions. Healthcare professionals declared that the spread of misinformation regarding  
64 alternative treatments, affected their credibility and the relationship with their patients.  
65 Healthcare professionals had knowledge about the drugs used in clinical trials, and they  
66 acknowledged the role of social media in spreading medical misinformation. However, younger

67 professionals also believed that social media could be used to share official information about  
68 the virus.

69

## 70 **Introduction**

71 The COVID 19 pandemic generated multiple changes in the way today's society  
72 members carry out their daily activities. One of the processes which was mostly affected by the  
73 pandemic was the communication process between institutions and the public, as well as  
74 between individuals. In this regard, from this perspective, Wwhile many domains were affected  
75 by the spread of the virus, such as the educational system or the cultural sector, the health  
76 sector was the one that faced the most challenges, ~~the pandemic managing to generate a~~  
77 ~~tremendous global public health crisis [1].~~

78 ~~Caused by severe acute respiratory syndrome coronavirus 2 (SARS-CoV-2) [2], the~~  
79 ~~disease was firstly detected in December 2019, in Wuhan, China [3], and it fastly spread all over~~  
80 ~~the world. The World Health Organization was informed about a pneumonia outbreak in~~  
81 ~~Wuhan on December 31 2019, the number of cases continued to increase, and on March 11~~  
82 ~~2020 the World Health Organization characterized COVID 19 as a pandemic [4]. Being highly~~  
83 ~~contagious, the virus affected a large number of people, and as of November 27 over 61 million~~  
84 ~~cases were reported [5]. Even though many companies and institutions are struggling to~~  
85 ~~develop a vaccine, Pfizer, Gamaleya Research Institute, University of Oxford, and a preliminary~~  
86 ~~analysis of the vaccine proposed by Pfizer showed that the vaccine is able to prevent more than~~  
87 ~~90% of people from getting infected with COVID 19 [6], so far no vaccine was approved as a~~  
88 ~~general and universal vaccine against COVID 19 [7].~~

89 ~~Ever since the pandemic was declared, finding the right treatment for the virus has~~  
90 ~~become a priority for researchers and doctors from all over the world. In this regard, large~~  
91 ~~number of trials started to be conducted, and in order to find an efficient drug treatment~~  
92 ~~against the virus, one method that was adopted was testing and administrating to patients,~~  
93 ~~drugs that were previously used for curing other viruses [8]. Thus, on March 20 2020, The~~  
94 ~~World Health Organization launched the SOLIDARITY clinical trial, a trial that monitored the~~  
95 ~~effects on patients infected with COVID 19, of specific drugs that proven to be effective in the~~  
96 ~~treatment of other diseases: remdesivir, interferon beta, chloroquine and hydroxychloroquine-~~  
97 ~~previously used for Malaria, as well as drugs used on HIV patients: lopinavir and ritonavir [9].~~  
98 ~~However, according to the interim results published on October 15 2020 by WHO, even though~~  
99 ~~those drugs were taught to have positive effects on treating COVID 19, they had little influence~~  
100 ~~or no influence at all on mortality in general, on the need and initiation of ventilation and on~~  
101 ~~the recovery process [10].~~

102 “Caused by severe acute respiratory syndrome coronavirus 2 [2], the disease was firstly  
103 detected in December 2019, in Wuhan, China [3]. Due to the evolution of the virus, the World  
104 Health Organization declared the pandemic in March 2020 [4], and as of November 27 over 61  
105 million cases were reported [5]. In this regard, although several companies are struggling to  
106 develop a vaccine, and some of the proposed vaccines showed promising results [6], so far no  
107 vaccine was approved in order to be administrated to the entire population [7]. Ever since the  
108 pandemic was declared, many companies started to be preoccupied with finding a treatment,  
109 and one method used that was adopted was administrating to patients, drugs that were  
110 previously used for curing other viruses [8]. Thus, one of the most well - known trials started

111 was the SOLIDARITY trial, which focused on using various drugs including chloroquine and  
112 hydroxychloroquine, lopinavir or ritonavir [9]. However, even if those drugs were taught to  
113 have positive effects on treating the virus, they did not have a significant influence on  
114 preventing mortality in general [10].

115         With the development of many trials and programs meant to find a cure for COVID 19  
116 and with the use of diverse drug combinations, another major problem arose: misinformation  
117 and fake news about the virus, its treatment or methods to combat it. In this regard, along with  
118 the pandemic, people also had to face an epidemic of information, described by the general  
119 director of WHO as an „infodemic” [11]. In other words, information about COVID 19 began to  
120 be spread by people on every available communication channel, both in the online and offline  
121 environment. However, very often and especially on social media, the information was poorly  
122 communicated, it was distorted and there usually wasn't enough scientific evidence to  
123 demonstrate its validity [12].

124         Taking into account the previously mentioned aspects the paper addresses the issues of  
125 drugs tested and used for the treatment of COVID 19 and how information about COVID 19 was  
126 communicated in the offline and online environment. ~~The purpose of the paper is to analyze,~~  
127 ~~from the perspective of medical staff, the way medical and non - medical information about the~~  
128 ~~virus was communicated during the pandemic in order to raise awareness about the way~~  
129 ~~misinformation affected medical staff.~~ The purpose of the paper is to analyze, from the  
130 perspective of medical staff, the way medical and non - medical information about the virus  
131 was communicated during the pandemic in order to encourage the development of future  
132 research or interventions in order to raise awareness about the way misinformation affected

133 medical staff. Thus, the paper aims at finding an answer to three research questions: (1) to  
134 what extent information about alternative treatments affected the credibility of medical staff?  
135 (2) What is the knowledge of medical staff about the type of drugs that had positive effects on  
136 treating the disease and about alternative treatments? (3) How satisfied is the medical staff  
137 with the way medical and non-medical information was communicated online and offline  
138 during the pandemic? (4) What is the perception of medical staff about the role of social media  
139 in spreading misinformation about the virus? (5) What aspects of the professional activity of the  
140 medical staff were affected most by the COVID – 19 pandemic?

Formatted: Font color: Text 1

141 ~~Hence, considering the purpose of our paper and the research questions, we believed it~~  
142 ~~was necessary to analyze the literature on the drugs used to treat COVID – 19, on the role of~~  
143 ~~social media platforms in spreading fake information about the virus and potential treatments,~~  
144 ~~and on the way the pandemic influenced the credibility of doctors and their relationship with~~  
145 ~~their patients.~~

## 146 **Literature review**

### 147 **Information on drugs used to treat COVID 19**

148 Before analyzing the way information about the virus was communicated in the online  
149 environment, it is important to take a look at the drugs used to treat the disease. Hence, one of  
150 the most important issues that appeared with the COVID 19 pandemic, was finding the right  
151 treatment for the virus. In this regard, researchers started to develop many experimental trials  
152 and used diversified drug combinations in order to treat patients with COVID 19. However,  
153 information that was communicated about the effectiveness of certain drugs was often  
154 contradictory.

155 Chloroquine and hydroxychloroquine are two drugs that were tested and included in  
156 many trials. Both drugs were previously used to treat malaria but they also have antiviral  
157 effects on viruses like HIV since they have the ability to prevent the virus to enter in the host  
158 cells [13]. Even though they have similar compounds, chloroquine is taught to have more  
159 negative effects than hydroxychloroquine [14], and hydroxychloroquine is considered safer due  
160 to the fact that it can be tolerated better for a longer period of time [15].

161 While some studies show positive effects of hydroxychloroquine in inhibiting the  
162 infection with the virus in vitro [16, 17], other studies found no influence of the drug on  
163 mortality rate or time spent by patients in the hospital [18]. However, when  
164 hydroxychloroquine was combined with other drugs such as azithromycin, it showed beneficial  
165 effects in treating patients with COVID 19 [19].

166 Nonetheless the findings regarded the effectiveness of these drugs were contrasting.  
167 For example, on March 28 2020 the Food and Drug Administration (FDA) issued an Emergency  
168 Use Authorization for using hydroxychloroquine in treating people suffering from COVID 19  
169 [20], and in June 15 2020, the FDA retracted the authorization stating that the trials in which  
170 the drug was involved showed that the drug had no effect on the faster recovery of patients or  
171 on decreasing chances of death [21]. Even more, on 5th June 2020 the UK trial, Randomised  
172 Evaluation of COVID 19 THERAPY (RECOVERY), also stopped testing the drug on patients  
173 because the results showed no benefits in improving the conditions of hospitalized patients  
174 with COVID 19 [22].

175 Studies were carried out with other drugs such as lopinavir/ritonavir, an antiviral drug  
176 used in the treatment of HIV [23]. While in concentration of 4 µg/ml and 50 µg/ml, the drug

177 showed positive effects against the virus in vitro [24], a study on 199 patients, from which 99  
178 received the drug and the other 100 did not receive the drug, revealed that lopinavir/ritonavir  
179 had no benefits when it comes to diminishing mortality or improving the state of patients with  
180 severe symptoms [25].

181 Controversial discussions also involved the use of Ibuprofen, a Non-steroidal anti-inflammatory  
182 drug that is used to treat fever, or inflammation [26]. Since the pandemic was declared there  
183 has been a preoccupation regarding ibuprofen and its role in making people more vulnerable to  
184 contacting the virus. Thus, right after the declaration of the pandemic, in a letter addressed to  
185 The Lancet Journal, researchers pointed out that ibuprofen could make people with diabetes,  
186 cardiac disease or hypertension more likely to get infected with virus and have severe  
187 symptoms [27]. However, while firstly, WHO recommended people who are infected with the  
188 virus not to take ibuprofen, only one day after that recommendation, on 18 March 2020, WHO  
189 corrected its statement and mentioned that it "does not recommend against ibuprofen" [28].  
190 Even more, a study focusing on the use of ibuprofen showed that the drug does not make  
191 patients feel worse [29] and another study that analyzed the use of ibuprofen and paracetamol  
192 of 403 COVID 19 confirmed patients revealed that compared to paracetamol, ibuprofen did not  
193 aggravated the clinical state of the patients [30].

194 While other drugs failed to show beneficial effects on the treatment of COVID 19, drugs  
195 like dexamethasone, which is included in the UK RECOVERY trial, revealed positive effects on  
196 people suffering from COVID 19: the drug lowered the risk of death in patients on ventilators  
197 from 40% to 28% and in patients who were in need of oxygen, from 25% to 20%, but did not  
198 influence the state of patients who did not need oxygen [31, 32].

199 Another highly tested drug was Remdesivir, an antiviral drug produced by Gilead  
200 Sciences that was previously used in treating Ebola [33]. The information regarding its positive  
201 effects on treating COVID 19 is also contradictory. A study conducted from February 6 2020  
202 until March 12 2020, on 237 patients, showed that the drug did not bring any benefits for  
203 people that had severe symptoms of COVID 19 [34], while a more recent study revealed that  
204 Remdesivir had a more positive effect in reducing the time of recovery in patients with COVID  
205 19 that showed signs of respiratory issues, than it had the placebo effect [35]. However, the  
206 FDA approved on October 22 2020, the use of Remdesivir in the case of adults and also children  
207 aged 12 or older who have at least 44 kilograms, who are infected with the virus and need to be  
208 treated in the hospital [36], and as of November 20 2020, FDA allows, in emergency cases, the  
209 use of Remdesivir in combination with Baricitinib, for adults and children aged two or older that  
210 require oxygen and treatment in the hospital [37].

## 211 **Social media and COVID 19 misinformation**

212 Together with the health crisis, the COVID 19 pandemic generated an information crisis,  
213 often described as an infodemic, that is represented by the spread of fake news, misguided and  
214 false information, especially in the online environment [38].

215 In this context, social media plays an essential role in disseminating information. Social  
216 media consists of internet based channels that provide people with the opportunity to interact,  
217 communicate in asynchronous way and in real time, with either small or large audiences where  
218 value is derived from user generated content [39]. Social media comprises multiple social  
219 networks, which according to Boyd and Ellison, offer users the possibility to create profiles that



220 are public, or semi-public, to create a list of people with whom they can interact and share  
221 information and to view the list of connections that other users make [40].

222         Social media channels are often used in time of crisis not only by citizen, but also by  
223 official authorities, emergency services, because they can facilitate communication and the  
224 spread of valuable information that can contribute to surpassing the crisis [41]. Social networks  
225 like Facebook, Whatsapp, Twitter, Instagram can function as sources that have the ability to  
226 confirm or complete the information communicated by the authorities, while also receiving  
227 feedback from the public [42]. Thus, sending messages through social media channels is a  
228 strategy that can help authorities obtain feedback on certain proposals regarding public health  
229 policies [43]. Even more, a study regarding the influence of social media on the way people  
230 protect their health during the pandemic, showed that social media can have positive impact on  
231 increasing awareness about public health and protection against the virus [44].

232         However, during the pandemic, while authorities can use social media to keep the  
233 public informed, a major issue generated by social media, that public health representatives  
234 have to face, is the spread of fake news [45].

235         Fake news are represented by fabricated information designed in the form of news  
236 communicated by the media that do not share the same process of organization and do not  
237 have the same intent, and fake news are related to misinformation: information that is false or  
238 misleading, and disinformation: a type of false information whose aim is to deceive people [46].

239         Thus, the internet became a favorable environment for spreading conspiracy theories or  
240 false information about alternative treatment for the virus. Since people were stressed and  
241 frightened by the uncertainty of the situation, they started to consider reasonable and valid any

242 information that presented explanations in regards to the virus [47]. Thus, when referring to  
243 health information, false news often undermine the credibility of official sources, they create  
244 confusion among people and favor the faster spread of the virus [48].

245           Misinformation during the pandemic can negatively influence peoples' health because  
246 false information is not easy to recognize, because it can determine people to change their  
247 behavior in a way that is harmful to their health and those around them. Thus, since the  
248 pandemic was declared, false information has been spread about the origin of the virus, about  
249 what caused it, how it spreads and what treatment is efficient for eliminating it [49]. However,  
250 a study focusing on the WhatsApp platform showed that when the information on social media  
251 is shared by trusted sources, it can increase knowledge about the virus and encourage people  
252 to adopt preventive behavior [50].

253           During the time of crisis, on platforms like WhatsApp or Facebook, more and more false  
254 news and unverified information about the virus began to be shared. With millions of users  
255 worldwide, WhatsApp became one of the platforms where most fake news were shared by  
256 forwarding messages to many users [51], while Facebook was characterized as the core,  
257 epicenter of misinformation [52].

258           When it comes to health misinformation on social media, the most discussed subjects  
259 are alternative cures involving certain food or drinks, hygiene related actions and treatment  
260 drugs. Thus, among the most "recommended" practices for preventing or curing COVID were  
261 drinking hot water every 15 minutes in order for the virus to go into the stomach, eating garlic,  
262 taking vitamin C or even pointing a hairdryer to the nostrils because the heat could eliminate  
263 the virus [53].

264 False news that circulated on social media regarding the virus also involve the idea that the  
265 virus was created on purpose in a lab, three in ten Americans considering true this information  
266 [54].

267 However, many other unverified methods were shared and the most forwarded  
268 messages on WhatsApp presented information about the fact that if people hold their breath  
269 for ten seconds without coughing then they are not infected with the virus, about the idea that  
270 at temperatures of 30-35 Celsius degrees the virus will die, messages about the release of the  
271 vaccine or about drugs allegedly recommended by Chinese doctors that could be efficient in  
272 eliminating the virus [55].

273 Nonetheless, misinformation became a major issue in the context of the pandemic, but  
274 also a subject of interest for researchers. A study focusing on the spread of fake news showed  
275 that most news reconfigure and twist the original information thus creating a different context,  
276 and that most of them contain false information about public authorities and health  
277 organizations [56].

278 Another study found that people who tend to rely on their intuition or who possess little  
279 scientific knowledge about certain subjects, encountered difficulties in differentiating true and  
280 false information [57]. Thus, misleading or unverified information can negatively influence the  
281 way people behave. For example, people in USA who died after they consumed chloroquine  
282 may have used the drug because news about it mentioned that it could treat and eliminate the  
283 virus [58]. Even more, a study concerning misinformation on Facebook revealed that posts  
284 made from verified accounts contained more false information than the accounts that were not  
285 verified [59], while other study conducted from 23 April 2020 to 27 April 2020, focused on

286 perception about contradictory information and stated that 73% of participants mentioned  
287 they observed or were exposed to contrasting messages usually communicated by politicians or  
288 health experts [60].

289         Apart from influencing peoples' beliefs or health practices, COVID 19 fake news also  
290 influenced the activity of health professionals. Social media managed to increase the level of  
291 trust in information that comes from people's personal opinions rather than professionals [61],  
292 and doctor's credibility is often affected. In order to improve these situations, doctors must be  
293 willing to use social media not just to send messages, but to actively communicate with people,  
294 to offer feedback, to share their experiences and rectify and clarify the fake news presented on  
295 social media [62].

296         Among action from health professionals, in order to combat COVID 19 fake news, social  
297 media networks as well as public authorities must implement some strategies. For example, the  
298 government of United Kingdom developed collaboration programs between its rapid response  
299 teams and social media platforms, and Taiwan introduced greater fines for news that were  
300 proven to be false [63]. Moreover, even though some social networks such as Facebook or  
301 Twitter already implemented algorithms to identify and remove fake accounts [64], or to  
302 correct information [65], they should further develop efficient strategies in order to validate the  
303 information that people share [66].

304  
305  
306 **The influence of the pandemic on doctors' credibility and relationship**  
307 **with patients**

308 The way information regarding the virus was communicated online and offline during the  
309 pandemic played an essential role in the process of maintaining trust in health professionals. In

310 this regard, a previous longitudinal study conducted in Poland revealed that trust in physicians  
311 has declined from 2018 – 2020, and emphasized the idea that the decrease may be caused by  
312 the health problems that people had to cope with during the pandemic and the problems with  
313 the healthcare system of the country [67]. In Romanian context, a previous study showed that  
314 the communication process of the healthcare system was poor and confusing, and that public  
315 health authorities at national level focused more on global information about the virus, while  
316 local authorities failed to succeed in providing their “share of information” [68]. Another study,  
317 which focused on analyzing the online communication of Public Health Agencies from Italy,  
318 United States and Sweden, revealed that compared to Sweden and the United States, agencies  
319 from Italy collaborated more with other organizations, and that overall, the communication  
320 process of the agencies was coordinated by their members, that agencies also communicated  
321 with governments, but they rarely collaborated with political or non-governmental  
322 organizations [69]. Hence, while trust in the government and communication from authorized  
323 organizations is essential, the importance of trusting the professionals is highlighted by a study  
324 conducted in Thailand, which showed that in the cases in which people have low levels of trust  
325 in the government, trust in professionals can have a positive influence on the adoption of  
326 protective measures at the individual level [70].

327 Furthermore, another previous study conducted in Poland, revealed that information  
328 can have the power to influence the level of trust that people have in the healthcare system  
329 and in healthcare professionals, suggesting that an increase of trust in hospitals, may be  
330 associated with a decrease of trust in physicians [71].

331 While focusing on studying people's response to non- pharmaceutical interventions,  
332 conspiracy theories and alternative treatments, a study conducted in Finland showed that the  
333 level of trust people have in the system implemented in order to provide information about the  
334 virus, has an essential role in the way people react to the official measures recommended.  
335 Hence, most participants in the study were between 40 and 60 years of age, and the study  
336 emphasized that people who were less willing to comply with the non-pharmaceutical  
337 interventions implemented by the government, tended to believe more in conspiracies and had  
338 low levels of trust in the sources which provided information about the virus [72].

339 Another study, which focused on examining the relationship between trust in the  
340 healthcare system and people's choice of seeking medical help when they experienced COVID –  
341 19 symptoms, concluded that high levels of trust in the healthcare system can increase the  
342 probability of asking for medical help when people first notice COVID – 19 symptoms [73].

343 Taking into account the aspects mentioned above, we can infer that peoples' trust in  
344 doctors was affected during the pandemic. In this regard, in the context of misinformation, one  
345 of the reasons why people lost trust in doctors may be the fact that, besides using social media  
346 for communicating information, for networking or for interacting with patients, many medical  
347 or dental practitioners used social media to express their professional opinions about the virus,  
348 opinions which were not validated and which later proven to be inaccurate [74]. In other words,  
349 health professionals may have contributed to the spread of misinformation, and such behavior  
350 can contribute to the decrease of trust in medical processes and in healthcare professionals  
351 [75]. Other researchers who focused on examining medical misinformation, found that most  
352 doctors (94.2%) stated that patients had medical misinformation, and the subjects about they

353 had the most inaccurate information were represented by COVID – 19 vaccines, COVID – 19  
354 origin, treatment or essential oils [76]. Furthermore, a previous study discovered that trust in  
355 doctors increased with age, and communication difficulties decreased, and that trust in doctors  
356 decreased while the level of education and communication difficulties increased [77].

357 Hence, while acknowledging that the pandemic influenced the trust in medical  
358 professionals, another aspect that was negatively influenced was the relationships between  
359 doctors and their patients. A study which focused on examining the doctor – patient interaction  
360 from the perspective of both groups of people, revealed differences in the respondents'  
361 opinions. Thus, most doctors stated that they still make eye contact (72%) and that they still  
362 show patients empathy, but only few patients declared that their doctors made eye contact  
363 (56,8%) or showed them empathy (43,2%) [78].

## 364 ~~Methods and materials~~ Materials and methods

### 365 Research design

366 The present study was conducted on Romanian healthcare professionals including doctors,  
367 nurses and medical students. The method used is quantitative. The questionnaire was  
368 administrated online, the data was collected through the help of Google forms, and was  
369 disseminated on groups of healthcare professionals and students on platforms such as  
370 Facebook and WhatsApp, during the period April 2021– June 2021. The data we collected was  
371 firstly exported to Microsoft Excel, and then it was analyzed with IBM Statistical Package for the  
372 Social Sciences, version 20. The respondents were informed about the purpose of the study,  
373 about the fact that they were allowed to withdraw at any time, and they were asked to give

374 their consent for participating in the study. The average time needed to complete the  
375 questionnaire was 15 minutes.  
376 Considering the validity of our research, we took into account the theoretical information from  
377 the literature regarding the development of a questionnaire. Our team of researchers together  
378 with health specialists have configured the dimensions, and operationalized the concepts in  
379 accordance with the theoretical approaches identified at the current stage of the research.  
380 Even more, we pre-tested the questionnaire before disseminating in order to guarantee the  
381 validity of the instrument. Thus, the questionnaire was completed by 50 respondents in the  
382 pre-testing stage. Considering the reliability of the research, we used split half reliability  
383 method. We split our sample in half, and we checked the variables in from our sub-samples in  
384 order to see if the variables provided convergent results. The convergent results we obtained  
385 by applying the split half method showed that we obtained a high fidelity measurement.

386

Formatted: Font: Not Bold

## 387 **The research instrument**

388 In order to conduct the research we used a quantitative method while having a questionnaire  
389 as an instrument. In this regard, we developed a questionnaire which comprises four sections:  
390 A. Influence of the pandemic on the professional activity of medical staff (items A1 to A4), B.  
391 Perception about the authorities' communication process (items B1 to B11), C. Perception  
392 about the communication of non- validated treatments (items C1 to C20), and D.  
393 Sociodemographic questions (items D1 – D9), such as: gender, age, living environment,  
394 professional degree, field of specialization. The sociodemographic questions were used in order  
395 to identify different or similar attitudes between specific groups. The questionnaire can be

Formatted: Justified, Line spacing: Double



396 found in “S1.Appendix English version of the questionnaire”, and in “S2. Appendix Romanian  
397 version of the questionnaire.” Before disseminating the questionnaire, the instrument was  
398 tested on 30 doctors who work in the field of cardiology and general medicine. The  
399 respondents understood clearly the questions and did not report any issue in the process of  
400 answering them. Hence, the questionnaire comprises close ended and open ended questions  
401 (Items A1, A4,B3, B11, C19, C20, D2, D5, D6,) dihotomic questions as well as questions whose  
402 answers were measured on a 7 point Likert scale. For example, item A2 measured the extent to  
403 which the respondents considered that the pandemic influenced the way they carried out their  
404 professional activity (1- “to an extremely little extent, 7 “to an extremely great extent”), or item  
405 B2 measure the respondents’ level of agreement with statements regarding the way authorities  
406 communicated during the pandemic (1 – “strongly disagree, 7-“ strongly agree”).

Formatted: Font: 12 pt, Not Bold, Font color: Text 1

## 407 **Sampling and data collection procedures**

408 ~~The present study was conducted on Romanian healthcare professionals including doctors,~~  
409 ~~nurses and medical students. The questionnaire was administered online, the data was~~  
410 ~~collected through the help of Google forms, and was disseminated on groups of healthcare~~  
411 ~~professionals and students on platforms such as Facebook and WhatsApp, during the period~~  
412 ~~April 2021– June 2021. The data we collected was firstly exported to Microsoft Excel, and then~~  
413 ~~it was analyzed with IBM Statistical Package for the Social Sciences, version 20. At the beginning~~  
414 ~~of the questionnaire, the respondents were informed about the purpose of the study, about~~  
415 ~~the fact that they were allowed to withdraw at any time, and they were asked to give their~~  
416 ~~consent for participating in the study. The average time needed to complete the questionnaire~~

417 ~~was 15 minutes, and the research received approval from The Council of the Faculty of~~  
418 ~~Sociology and Communication, approval request Nr.378/30.03.2021.~~

419 ~~———In order to conduct the research we used a quantitative method while having as an~~  
420 ~~instrument a questionnaire. The responses were collected online, with the help of Google~~  
421 ~~forms, and the questionnaire was self – administrated. The research received approval from~~  
422 ~~The Council of the Faculty of Sociology and Communication, approval request~~  
423 ~~Nr.378/30.03.2021. Taking into account the sampling method and the calculation of the study~~

424 ~~sample, we used random, probabilistic sampling method. We took into consideration~~  
425 ~~specialists, physicians, and medical students from Brasov, and we applied the snowballing~~  
426 ~~method in order to disseminate the questionnaire. The sample of our study comprises 536~~  
427 ~~respondents, and includes doctors, nurses as well as medical students from Romania.- Out of~~  
428 ~~the 536 respondents, 460 (85.8%) were female and 76 (14.2%) were male. A total of 411~~  
429 ~~respondents live in the urban area (76.7%), while 125 (23.3%) live in the rural area. Most~~  
430 ~~respondents (286, 53.4%) are between 18 and 35 years of age, 142 respondents (26.5%) are~~  
431 ~~between 36 and 50 years of age, 102 respondents (19.0%) are between 51 and 65 years of age,~~  
432 ~~and 6 of them (1.1) are over 65 years of age. When it comes to the professional degree of the~~  
433 ~~respondents, most of them are students at a university nursing program (122, 22.8%), and~~  
434 ~~medical students (120, 22.4%). However, a total of 102 respondents (19.0%) are senior~~  
435 ~~specialists medical – doctors, and 70 (13.1%) are nurses who have a higher education diploma.~~  
436 ~~When it comes to the respondents field of specialization, most of them (70.5%) operate in the~~  
437 ~~field of general medicine, while others are family doctors (10.4%), pediatricians (3%), dentists~~  
438 ~~or oncologists (1.9%), surgeons of doctors who are specialized in internal medicine (1.5%), or~~

Formatted: Font: Not Bold

439 ~~infectious disease doctors, radiologists or cardiologists (1.1%). Furthermore, most of the~~  
 440 ~~respondents (77.2%) stated that they did not work a unit with COVID-19 patients while few of~~  
 441 ~~them (22.8%) stated that they worked in such a unit at the time the research was conducted.~~  
 442 ~~Thus, all the characteristics of the sample are presented in Table 1.~~

443 **Table 1.** Sample characteristics (n = 536).

|                            | <b>Category</b>                  | <b>Count</b> | <b>Percentage</b> |
|----------------------------|----------------------------------|--------------|-------------------|
| <b>Gender</b>              | Female                           | 460          | 88.8%             |
|                            | Male                             | 76           | 14.2%             |
| <b>Living environment</b>  | Urban                            | 411          | 76.7%             |
|                            | Rural                            | 125          | 23.3%             |
| <b>Age</b>                 | 18-35 years old                  | 286          | 53.4%             |
|                            | 36-50 years old                  | 142          | 26.5%             |
|                            | 51-65 years old                  | 102          | 19.0%             |
|                            | Over 65 years old                | 6            | 1.1%              |
| <b>Professional degree</b> | Senior specialist medical doctor | 102          | 19.0%             |
|                            | Specialist medical doctor        | 46           | 8.6%              |
|                            | Resident                         | 28           | 5.2%              |

Formatted: Normal, Justified, Line spacing: Double

Nurse with higher education diploma 70 13.1%

Formatted: Normal, Justified, Line spacing: Double

Nurse with other studies than higher education 48 9.0%

Formatted: Normal, Justified, Line spacing: Double

Medical student 120 22.4%

Formatted: Normal, Justified, Line spacing: Double

Student at university nursing program 122 22.8%

Formatted: Normal, Justified, Line spacing: Double

Field of specialization General medicine 378 70.5%

Formatted: Normal, Justified, Line spacing: Double

Family doctor 56 10.4%

Formatted: Normal, Justified, Line spacing: Double

Pediatrics 16 3%

Formatted: Normal, Justified, Line spacing: Double

Stomatology 10 1.9%

Formatted: Normal, Justified, Line spacing: Double

Oncology 10 1.9%

Formatted: Normal, Justified, Line spacing: Double

Surgery 8 1.5%

Formatted: Normal, Justified, Line spacing: Double

Internal medicine 8 1.5%

Formatted: Normal, Justified, Line spacing: Double

Virology/ infectious disease doctor 6 1.1%

Formatted: Normal, Justified, Line spacing: Double

|                                        |            |     |       |
|----------------------------------------|------------|-----|-------|
|                                        | Cardiology | 6   | 1.1%  |
|                                        | Radiology  | 6   | 1.1%  |
|                                        | Other      | 32  | 6%    |
| Works in a unit with COVID-19 patients | Yes        | 122 | 22.8% |
|                                        | No         | 414 | 77.2% |

Formatted: Normal, Justified, Line spacing: Double

444

445

## 446 **The research instrument**

447 In order to conduct the research we used a quantitative method while having a questionnaire  
 448 as an instrument. In this regard, we developed a questionnaire which comprises four sections:  
 449 A. Influence of the pandemic on the professional activity of medical staff (items A1 to A4), B.  
 450 Perception about the authorities' communication process (items B1 to B11), C. Perception  
 451 about the communication of non validated treatments (items C1 to C20), and D.  
 452 Sociodemographic questions (items D1 to D9), such as: gender, age, living environment,  
 453 professional degree, field of specialization. The sociodemographic questions were used in order  
 454 to identify different or similar attitudes between specific groups. The questionnaire can be  
 455 found in "S1. Appendix English version of the questionnaire", and in "S2. Appendix Romanian  
 456 version of the questionnaire." Before disseminating the questionnaire, the instrument was  
 457 tested on 30 doctors who work in the field of cardiology and general medicine. The

458 ~~respondents understood clearly the questions and did not report any issue in the process of~~  
459 ~~answering them. Hence, the questionnaire comprises close ended and open ended questions~~  
460 ~~(Items A1, A4, B3, B11, C19, C20, D2, D5, D6,) dihatomic questions as well as questions whose~~  
461 ~~answers were measured on a 7 point Likert scale. For example, item A2 measured the extent to~~  
462 ~~which the respondents considered that the pandemic influenced the way they carried out their~~  
463 ~~professional activity (1 “to an extremely little extent, 7 “to an extremely great extent”), or item~~  
464 ~~B2 measure the respondents’ level of agreement with statements regarding the way authorities~~  
465 ~~communicated during the pandemic (1 “strongly disagree, 7 “strongly agree”).~~

466

## 467 **Data analysis**

468 Data was analyzed with IBM Statistical Package for the Social Sciences, version 20. In order to  
469 analyze the data and identify differences and similarities between the attitudes of certain  
470 groups, t tests for independent samples were performed. The t test were performed among  
471 groups: male/female, working in unit with COVID – 19 patients/ not working in unit with COVID  
472 – 19 patients, urban/rural area, and professional degree: medical staff/students. Hence, in  
473 order to be able to analyze the results depending on professional degree, we computed the  
474 variable of professional degree which had the following values: senior specialist medical –  
475 doctor, specialist medical – doctor, resident, nurse with higher education diploma, nurse with  
476 other studies than higher education, medical student, student at university nursing program, in  
477 a new variable. Thus, doctors, nurses and residents, were integrated in a new group called  
478 “medical staff”, while medical students and students at university nursing programs were

479 integrated in the group “students”. Moreover, for a better understanding of the way some  
480 variables correlate with each other, (for example: respondents satisfaction with the way  
481 authorities communicated during the pandemic and age, respondents’ opinion about the way  
482 misinformation about alternative treatments influenced doctors’ credibility and age), we also  
483 calculated the Pearson coefficient.

## 484 **Results**

485  
486 Out of the 536 respondents, 460 (85.8%) were female and 76 (14.2%) were male. A total of 411  
487 respondents live in the urban area (76.7%), while 125 (23.3%) live in the rural area. Most  
488 respondents (286, 53.4%) are between 18 and 35 years of age, 142 respondents (26.5%) are  
489 between 36 and 50 years of age, 102 respondents (19.0%) are between 51 and 65 years of age,  
490 and 6 of them (1.1) are over 65 years of age. When it comes to the professional degree of the  
491 respondents, most of them are students at a university nursing program (122, 22.8%), and  
492 medical students (120, 22.4%). However, a total of 102 respondents (19.0%) are senior  
493 specialists medical – doctors, and 70 (13.1%) are nurses who have a higher education diploma.  
494 When it comes to the respondents field of specialization, most of them (70.5%) operate in the  
495 field of general medicine, while others are family doctors (10.4%), pediatricians (3%), dentists  
496 or oncologists (1.9%), surgeons of doctors who are specialized in internal medicine (1.5%), or  
497 infectious disease doctors, radiologists or cardiologists (1.1%). Furthermore, most of the  
498 respondents (77.2%) stated that they did not work a unit with COVID – 19 patients while few of  
499 them (22.8%) stated that they worked in such a unit at the time the research was conducted.  
500 Thus, all the characteristics of the sample are presented in Table 1.

**Table 1.** Sample characteristics (n = 536).

|                                                 | <u>Category</u>                                       | <u>Count</u> | <u>Percentage</u> |
|-------------------------------------------------|-------------------------------------------------------|--------------|-------------------|
| <u>Gender</u>                                   | <u>Female</u>                                         | <u>460</u>   | <u>88.8%</u>      |
|                                                 | <u>Male</u>                                           | <u>76</u>    | <u>14.2%</u>      |
| <u>Living environment</u>                       | <u>Urban</u>                                          | <u>411</u>   | <u>76.7%</u>      |
|                                                 | <u>Rural</u>                                          | <u>125</u>   | <u>23.3%</u>      |
| <u>Age</u>                                      | <u>18-35 years old</u>                                | <u>286</u>   | <u>53.4%</u>      |
|                                                 | <u>36-50 years old</u>                                | <u>142</u>   | <u>26.5%</u>      |
|                                                 | <u>51 -65 years old</u>                               | <u>102</u>   | <u>19.0%</u>      |
|                                                 | <u>Over 65 years old</u>                              | <u>6</u>     | <u>1.1%</u>       |
| <u>Professional degree</u>                      | <u>Senior specialist medical - doctor</u>             | <u>102</u>   | <u>19.0%</u>      |
|                                                 | <u>Specialist medical - doctor</u>                    | <u>46</u>    | <u>8.6%</u>       |
|                                                 | <u>Resident</u>                                       | <u>28</u>    | <u>5.2%</u>       |
|                                                 | <u>Nurse with higher education diploma</u>            | <u>70</u>    | <u>13.1%</u>      |
|                                                 | <u>Nurse with other studies than higher education</u> | <u>48</u>    | <u>9.0%</u>       |
|                                                 | <u>Medical student</u>                                | <u>120</u>   | <u>22.4%</u>      |
|                                                 | <u>Student at university nursing program</u>          | <u>122</u>   | <u>22.8%</u>      |
|                                                 |                                                       |              |                   |
| <u>Field of specialization</u>                  | <u>General medicine</u>                               | <u>378</u>   | <u>70.5%</u>      |
|                                                 | <u>Family doctor</u>                                  | <u>56</u>    | <u>10.4%</u>      |
|                                                 | <u>Pediatrics</u>                                     | <u>16</u>    | <u>3%</u>         |
|                                                 | <u>Stomatology</u>                                    | <u>10</u>    | <u>1.9%</u>       |
|                                                 | <u>Oncology</u>                                       | <u>10</u>    | <u>1.9%</u>       |
|                                                 | <u>Surgery</u>                                        | <u>8</u>     | <u>1.5%</u>       |
|                                                 | <u>Internal medicine</u>                              | <u>8</u>     | <u>1.5%</u>       |
|                                                 | <u>Virology/ infectious disease doctor</u>            | <u>6</u>     | <u>1.1%</u>       |
|                                                 | <u>Cardiology</u>                                     | <u>6</u>     | <u>1.1%</u>       |
|                                                 | <u>Radiology</u>                                      | <u>6</u>     | <u>1.1%</u>       |
|                                                 | <u>Other</u>                                          | <u>32</u>    | <u>6%</u>         |
| <u>Works in a unit with COVID – 19 patients</u> | <u>Yes</u>                                            | <u>122</u>   | <u>22.8%</u>      |
|                                                 | <u>No</u>                                             | <u>414</u>   | <u>77.2%</u>      |



502  
 503 **1) To what extent information about alternative treatments affected**  
 504 **the credibility of medical staff?**

505 The results of our research revealed that respondents were of the opinion that information  
 506 about alternative treatments for COVID -19 affected the credibility of healthcare professionals.  
 507 Hence, most respondents (32.5%), stated that trust in healthcare professionals was affected to  
 508 a an extremely great extent by the information about alternative treatments, many of them  
 509 declared that credibility was affected to a very great extent (23.1%), and to a great extent  
 510 (21.3%) ([S3 tables with results for 1<sup>st</sup> research question -Table 2 Table 1](#)).

Formatted: Superscript

**Table 1.** The extent to which information about alternative treatments affected trust in physicians

|                                                  | Frequency | Percent | Valid Percent | Cumulative Percent |
|--------------------------------------------------|-----------|---------|---------------|--------------------|
| to an extremely little extent                    | 14        | 2.6     | 2.6           | 2.6                |
| to a very little extent                          | 10        | 1.9     | 1.9           | 4.5                |
| to a little extent                               | 42        | 7.8     | 7.8           | 12.3               |
| Valid nor to a little, neither to a great extent | 58        | 10.8    | 10.8          | 23.1               |
| to a great extent                                | 114       | 21.3    | 21.3          | 44.4               |
| to a very great extent                           | 124       | 23.1    | 23.1          | 67.5               |
| to an extremely great extent                     | 174       | 32.5    | 32.5          | 100.0              |
| Total                                            | 536       | 100.0   | 100.0         |                    |

512 Furthermore, the Pearson correlation performed between the extent to which  
 513 respondents believed that information about alternative treatments affected people’s trust in  
 514 doctors and the age of the respondents, revealed a weak, negative and statistically significant  
 515 correlation between the two variables ( $r(534) = -.155, p=0.001$ ) (Table [32](#)). Hence, as the age of  
 516

517 the medical staff decreases, the extent to which they believe the credibility of doctors was  
 518 affected increases. In other words, compared to older healthcare professionals, younger  
 519 healthcare professionals tend to believe more that information about alternative treatments  
 520 affected trust in doctors. One possible explanation for this result can be that younger people  
 521 tend to be fonder of keeping up with trends and being up to date, and in this context, it is  
 522 possible that they came into contact more frequently with information about certain  
 523 alternative treatments for COVID – 19, this making them more aware about the way such  
 524 treatments can undermine doctor’s credibility.

**Table 32.** Pearson correlation between information about alternative treatments and age

|                                                                                                             |                     | C14. The extent to which information about alternative treatments affected trust in physicians | D2. Age |
|-------------------------------------------------------------------------------------------------------------|---------------------|------------------------------------------------------------------------------------------------|---------|
| C14. <sup>1</sup> The extent to which information about alternative treatments affected trust in physicians | Pearson Correlation | 1                                                                                              | -.155** |
|                                                                                                             | Sig. (2-tailed)     |                                                                                                | .000    |
|                                                                                                             | N                   | 536                                                                                            | 536     |
| D2. <sup>2</sup> Age                                                                                        | Pearson Correlation | -.155**                                                                                        | 1       |
|                                                                                                             | Sig. (2-tailed)     | .000                                                                                           |         |
|                                                                                                             | N                   | 536                                                                                            | 536     |

\*\* . Correlation is significant at the 0.01 level (2-tailed).

<sup>1</sup> C14 – refers to the question 14 from the section C of the manuscript (The extent to which information about alternative treatments affected trust in physicians), section which refers to Perception about the communication of non- validated treatments

<sup>2</sup> D2 - refers to question 2 from the D section of the manuscript (age), which refers to Sociodemographic characteristics of the respondents.

Formatted: Font: 10 pt

Formatted: Font: 10 pt, Not Superscript/ Subscript

Formatted: Font: 10 pt, Not Superscript/ Subscript

Formatted: Font: 10 pt

525 In order to observe if there any differences in the opinion of the respondents depending  
 526 on certain variables including, age, gender, or living environment, we performed t tests for  
 527

528 independent samples. The results of the significant t tests (Table 43), showed that students  
 529 believed to a greater extent (M= 5.60, SD=1.49), that information about alternative treatments  
 530 negatively affects the credibility of doctors, than the medical staff (M=5.33, SD=1.54). Also,  
 531 respondents who declared they worked in a unit without COVID – 19 patients (M=5.53,  
 532 SD=1.49), were more of the opinion that information about alternative cures affected trust in  
 533 health professionals, than respondents who worked in a unit with COVID – 19 patients (M=5.19,  
 534 SD=1.61). One possible explanation would be that, doctors who interacted with COVID – 19  
 535 patients may have observed that when being put in the situation to receive medical care in the  
 536 hospital, patients still had faith and trust in doctors. Moreover, another explanation is that  
 537 respondents who did not come into contact with COVID – 19 patients were not that close with  
 538 the situation and thus they might have had a more distorted perception about the situation  
 539 than those professionals who interacted with COVID – 19 patients. Moreover, the results of the  
 540 research also showed that female respondents (M=5.51, SD=1.48), believed more than male  
 541 respondents (M=5.10, SD=1.70), that trust in healthcare professionals was affected by the  
 542 information about alternative treatments.

543 **Table 43.** Significant t-test results: comparisons between variables

|                                                                            | Group         | N   | Mean | S. D. | t     | df  | p   | t-test for Equality of Means |                       |           |       |
|----------------------------------------------------------------------------|---------------|-----|------|-------|-------|-----|-----|------------------------------|-----------------------|-----------|-------|
|                                                                            |               |     |      |       |       |     |     | Mean Difference              | Std. Error Difference | CI4 Lower | Upper |
| <b>Variables:</b>                                                          | Medical staff | 294 | 5.33 | 1.54  | -2.04 | 534 | .04 | -.27                         | .13                   | -.52      | -.01  |
| Information about alternative treatments_ Professional degree <sup>1</sup> | Student       | 242 | 5.60 | 1.49  |       |     |     |                              |                       |           |       |



|                                        |     |       |
|----------------------------------------|-----|-------|
| Azithromicin                           | 206 | 38.4% |
| Chloroquine,<br>Hydroxychloroquine     | 124 | 23.1% |
| Dexamethasone                          | 250 | 46.6% |
| Doxycycline                            | 32  | 6.0%  |
| Favipiravir                            | 74  | 13.8% |
| Ibuprofen                              | 106 | 19.8% |
| Lopinavir/Ritonavir                    | 56  | 10.4% |
| Oseltamivir, Peramivir<br>or Zanamivir | 32  | 6.0%  |
| Remdesivir                             | 217 | 40.5% |
| Tocilizumab                            | 85  | 15.9% |
| Umifenovir                             | 17  | 3.2%  |

563

564 In the context of respondents' perception about alternative methods of preventing and treating  
565 the virus, the findings show that, most of them stated that they heard about the fact that  
566 alcohol consumption can prevent the infection with the virus (24.3%), that drinking warm water  
567 every 15 minutes may help eliminate the virus (21.3%), but also that pointing the hot air of the  
568 hairdryer to the nostrils leads to the elimination of the virus (16.8%) ([S4 tables with results to](#)  
569 [the 2<sup>nd</sup> research question Table 6Table-5](#)).

Formatted: Superscript

**Table 5.** Medical staff's knowledge about alternative methods of preventing and treating the virus

|                                                                   | Frequency | Percent | Valid Percent | Cumulative Percent |
|-------------------------------------------------------------------|-----------|---------|---------------|--------------------|
| Valid drinking alcohol helps you eliminate the virus              | 79        | 14.7    | 14.7          | 14.7               |
| drinking alcohol prevents the infection with the virus            | 130       | 24.3    | 24.3          | 39.0               |
| Valid rinsing the nostrils with disinfectant eliminates the virus | 81        | 15.1    | 15.1          | 54.1               |
| drinking hot water every 15 minutes eliminates the virus          | 114       | 21.3    | 21.3          | 75.4               |

|                                                                        |     |       |       |       |
|------------------------------------------------------------------------|-----|-------|-------|-------|
| pointing hot air to the nostrils leads to the elimination of the virus | 90  | 16.8  | 16.8  | 92.2  |
| other                                                                  | 42  | 7.8   | 7.8   | 100.0 |
| Total                                                                  | 536 | 100.0 | 100.0 |       |

570

571 **3) How satisfied is the medical staff with the way medical and non-**  
572 **medical information was communicated during the pandemic?**

573

574 The findings of the study revealed that respondents were mostly dissatisfied with the way  
575 medical and non – medical information was communicated during the pandemic. Hence, the  
576 sum of the responses with negative valences of the study participants (extremely dissatisfied,  
577 very dissatisfied and dissatisfied), showed that 238 of them, (44.4%) were dissatisfied with the  
578 process of sending medical and non- medical information, while the sum of the positive  
579 responses (satisfied, very satisfied, extremely satisfied) showed that 162 of them (30.2%),  
580 were satisfied with the communication process ([S5 Tables with results to the 3<sup>rd</sup> research](#)  
581 [question Table 7 Table 6](#)). In other words, the study highlighted that respondents registered  
582 mostly low level of satisfaction with the way information was sent during the pandemic.

Formatted: Superscript

583

**Table 6. The level of satisfaction with the way information about drugs used to treat the virus were communicated at national level**

|                                           | Frequency | Percent | Valid Percent | Cumulative Percent |
|-------------------------------------------|-----------|---------|---------------|--------------------|
| extremely dissatisfied                    | 52        | 9.7     | 9.7           | 9.7                |
| very dissatisfied                         | 76        | 14.2    | 14.2          | 23.9               |
| dissatisfied                              | 110       | 20.5    | 20.5          | 44.4               |
| Valid Not dissatisfied, neither satisfied | 136       | 25.4    | 25.4          | 69.8               |
| satisfied                                 | 108       | 20.1    | 20.1          | 89.9               |
| very satisfied                            | 30        | 5.6     | 5.6           | 95.5               |
| Extremely satisfied                       | 24        | 4.5     | 4.5           | 100.0              |

|              |            |              |              |
|--------------|------------|--------------|--------------|
| <b>Total</b> | <b>536</b> | <b>100.0</b> | <b>100.0</b> |
|--------------|------------|--------------|--------------|

584  
585 Furthermore, in the context of the medical staff's satisfaction with the way information  
586 about drugs used to treat the virus was communicated at national level, the research showed  
587 that as age of the respondents decreases, the level of satisfaction increases ( $r(534) = -.091$ ,  
588  $p=0.035$ ) (Table 87). Thus, according to this result, it can be inferred that younger people were  
589 more satisfied than older people, with how information about drugs used to treat the virus was  
590 communicated.

**Table 87.** Pearson Correlation: satisfaction with the way information about drugs used to treat the virus was communicated and age

|                                                                                                               |                     | B10. Satisfaction with the way information about drugs used to treat the virus was communicated | D2. Age |
|---------------------------------------------------------------------------------------------------------------|---------------------|-------------------------------------------------------------------------------------------------|---------|
| B10 <sup>1</sup> . Satisfaction with the way information about drugs used to treat the virus was communicated | Pearson Correlation | 1                                                                                               | -.091*  |
|                                                                                                               | Sig. (2-tailed)     |                                                                                                 | .035    |
|                                                                                                               | N                   | 536                                                                                             | 536     |
| D2 <sup>2</sup> . Age                                                                                         | Pearson Correlation | -.091*                                                                                          | 1       |
|                                                                                                               | Sig. (2-tailed)     | .035                                                                                            |         |
|                                                                                                               | N                   | 536                                                                                             | 536     |

\*. Correlation is significant at the 0.05 level (2-tailed).

<sup>1</sup>B10- refers to the question 10 from the section B of the manuscript (Satisfaction with the way information about drugs used to treat the virus was communicated) section which refers to Perception about the authorities' communication process

<sup>2</sup>D2 - refers to question 2 from the D section of the manuscript (age), which refers to Sociodemographic characteristics of the respondents.

- Formatted: Font: 10 pt
- Formatted: Font: 10 pt, Superscript
- Formatted: Font: 10 pt
- Formatted: Font: 10 pt, Superscript
- Formatted: Font: 10 pt

591  
592 Moreover, when asked to evaluate the efficiency of the communication strategies  
593 adopted by authorities in order to send information about the virus, most respondents stated  
594 that the strategies were effective. Thus, the sum of the responses with negative valences shows

595 that 144 of them (26, 9%) described the communication strategies as inefficient, while 266 of  
 596 them (49, 6%) described them as efficient (S5 Tables with results to the 3<sup>rd</sup> research  
 597 question Table 9Table 8). One interesting result of the analysis, was that, when trying to  
 598 examine if the responses of the study participants about the efficiency of communication  
 599 strategies differ depending on certain variables such as working unit, gender, working unit,  
 600 living environment, the analysis found no differences between the responses of males and  
 601 females, of people working in units without COVID – 19 patients and people not working in  
 602 units with COVID – 19 patients, or in people from the rural and urban area.

Formatted: Superscript

**Table 8.** Perception about the efficiency of communication strategies adopted by authorities

|                                         | Frequency | Percent | Valid Percent | Cumulative Percent |
|-----------------------------------------|-----------|---------|---------------|--------------------|
| Extremely inefficient                   | 22        | 4.1     | 4.1           | 4.1                |
| very inefficient                        | 38        | 7.1     | 7.1           | 11.2               |
| inefficient                             | 84        | 15.7    | 15.7          | 26.9               |
| Valid neither efficient nor inefficient | 126       | 23.5    | 23.5          | 50.4               |
| efficient                               | 134       | 25.0    | 25.0          | 75.4               |
| very efficient                          | 80        | 14.9    | 14.9          | 90.3               |
| extremely efficient                     | 52        | 9.7     | 9.7           | 100.0              |
| Total                                   | 536       | 100.0   | 100.0         |                    |

Formatted Table

603  
 604 In the context of the information about drugs tested and used in the treatment against COVID –  
 605 19, the results showed that students believe to a greater extent that such information was  
 606 communicated in a coherent manner (M=4.05, SD=1.63), than the medical staff (M=3.79,  
 607 SD=1.53) (t(534)= -2.05, p<0.05) (Table 109.). Hence, one possible explanation for this result



608 would be that, due the experience and knowledge of the medical staff, people who were  
 609 already working in the healthcare system, such people have greater expectations from  
 610 authorities when it comes to sending medical information, than medical students.

611 **Table 109. Significant t test for information about drugs used to treat the virus and**  
 612 **professional degree**

|                                                                                                              | Group         | N   | Mean | S. D. | t-test for Equality of Means |     |     |                 |                       |           |       |
|--------------------------------------------------------------------------------------------------------------|---------------|-----|------|-------|------------------------------|-----|-----|-----------------|-----------------------|-----------|-------|
|                                                                                                              |               |     |      |       | t                            | df  | p   | Mean Difference | Std. Error Difference | CI4 Lower | Upper |
| Information about drugs tested and used to treat the disease <sup>1</sup> _ Professional degree <sup>2</sup> | Medical staff | 294 | 3.79 | 1.53  | -2.05                        | 534 | .03 | -.28            | .13                   | -.55      | -.01  |
|                                                                                                              | Student       | 242 | 4.05 | 1.63  |                              |     |     |                 |                       |           |       |

613 <sup>1</sup> The extent to which respondents believe that information about drugs tested and used to treat the virus  
 614 was communicated in a coherent manner

615 <sup>2</sup> Index variable from the professional degrees of respondents. Student: medical student and student at  
 616 university nursing program, Medical Staff: Senior specialist medical – doctor, Specialist medical – doctor,  
 617 Resident, Nurse with higher education diploma, Nurse with other studies than higher education

619 **(4) What is the perception of medical staff about the role of social**  
 620 **media in spreading misinformation about the virus?**

621 The results of the research revealed that respondents were inclined to believe more that social  
 622 media was a proper environment for spreading fake medical information during the pandemic.

623 By analyzing the information from [S6 Tables with results to the 4<sup>th</sup> research question Table 11](#)  
 624 [Table 10](#), it can be observed that the sum of the responses with negative valences (4.5%) (to an  
 625 extremely little extent, to a very little extent and to a little extent) is much lower than the sum  
 626 of the responses with positive valences (89.9%) ( to an extremely great extent, to a very great  
 627 extent, to a great extent). Hence, most participants of the study believe that social media  
 628

Formatted: Superscript

629 platforms favored the transmission of fake medical news during the pandemic. Furthermore,  
 630 when trying to find differences in the responses of the participants depending on age, gender,  
 631 living environment, professional degree or working unit (with COVID – 19 patients or without  
 632 COVID – 19 patients), we observed that their responses did not differ depending on such  
 633 variables. Thus, it can be inferred that, regardless of age, gender, living environment,  
 634 professional degree or working unit, respondents’ perception was that social media had a role  
 635 in spreading fake medical information.

**Table 10.** Perception about the extent to which social media contributed to the spread of medical fake news

|                                                  | Frequency | Percent | Valid Percent | Cumulative Percent |
|--------------------------------------------------|-----------|---------|---------------|--------------------|
| to an extremely little extent                    | 2         | .4      | .4            | .4                 |
| to a very little extent                          | 10        | 1.9     | 1.9           | 2.2                |
| to a little extent                               | 12        | 2.2     | 2.2           | 4.5                |
| Valid nor to a little, neither to a great extent | 30        | 5.6     | 5.6           | 10.1               |
| to a great extent                                | 62        | 11.6    | 11.6          | 21.6               |
| to a very great extent                           | 88        | 16.4    | 16.4          | 38.1               |
| to an extremely great extent                     | 332       | 61.9    | 61.9          | 100.0              |
| Total                                            | 536       | 100.0   | 100.0         |                    |

636  
 637 However, even though respondents were of the opinion that social media was an  
 638 environment in which was sent fake medical information, some of them still believe that social  
 639 media platforms are appropriate for sending official information about the virus. Thus,  
 640 considering the results from [S6 Tables with results to the 4<sup>th</sup> research question Table 12](#) ~~Table~~  
 641 ~~11~~, the sum of responses with positive valences (40.3%) is almost equal to the sum of responses  
 642 with negative valences (45.1%) meaning that the opinions of the study participants were  
 643 divided when it comes to sending official information about the virus on social media.

**Table 11.** Perception about the extent to which social media represents an appropriate environment for sharing official COVID – 19 information

|                                            | Frequency | Percent | Valid Percent | Cumulative Percent |
|--------------------------------------------|-----------|---------|---------------|--------------------|
| Valid to an extremely little extent        | 86        | 16.0    | 16.0          | 16.0               |
| to a very little extent                    | 78        | 14.6    | 14.6          | 30.6               |
| to a little extent                         | 52        | 9.7     | 9.7           | 40.3               |
| nor to a little, neither to a great extent | 78        | 14.6    | 14.6          | 54.9               |
| to a great extent                          | 72        | 13.4    | 13.4          | 68.3               |
| to a very great extent                     | 74        | 13.8    | 13.8          | 82.1               |
| to an extremely great extent               | 96        | 17.9    | 17.9          | 100.0              |
| Total                                      | 536       | 100.0   | 100.0         |                    |

644  
 645 A factor which showed a weak but statistically significant influence on respondents' opinion  
 646 about sending COVID – 19 official information on social media was age. Hence, the results of  
 647 the Pearson correlation ( $r(534) = -.175, p=0.000$ ), showed that as age decreases, the extent to  
 648 which respondents believed that social media is an environment in which official information  
 649 about the virus should be communicated decreases (Table 1312). In other words, younger  
 650 respondents believed to a greater extent than older respondents that official information  
 651 should also be communicated on social media. One possible explanation for this results would  
 652 be that young people gather most of their information from online sources, and they also  
 653 engage more with social media platforms, and thus it is possible that they would also like to see  
 654 official and important information on such platforms.

**Table 132.** Person correlation between the extent to which social media represents an appropriate environment for sharing official COVID – 19 info and age

| C1. The extent to which social media represents an appropriate environment for sharing official COVID – 19 info | D2. Age |
|-----------------------------------------------------------------------------------------------------------------|---------|
|-----------------------------------------------------------------------------------------------------------------|---------|

|                                                                                                                               |                     |         |         |
|-------------------------------------------------------------------------------------------------------------------------------|---------------------|---------|---------|
| C1 <sup>1</sup> . The extent to which social media represents an appropriate environment for sharing official COVID – 19 info | Pearson Correlation | 1       | -.175** |
|                                                                                                                               | Sig. (2-tailed)     |         | .000    |
|                                                                                                                               | N                   | 536     | 536     |
|                                                                                                                               | Pearson Correlation | -.175** | 1       |
| D2 <sup>2</sup> . Age                                                                                                         | Sig. (2-tailed)     |         | .000    |
|                                                                                                                               | N                   | 536     | 536     |

\*\* . Correlation is significant at the 0.01 level (2-tailed).

<sup>1</sup>C1 – refers to question 1 from the section C of the manuscript (The extent to which social media represents an appropriate environment for sharing official COVID – 19 info), section which refers to Perception about the communication of non- validated treatments

<sup>2</sup>D2 - refers to question 2 from the D section of the manuscript (age), which refers to Sociodemographic characteristics of the respondents.

Formatted: Font: 10 pt

Formatted: Font: 10 pt, Superscript

Formatted: Font: 10 pt

Formatted: Font: 10 pt, Superscript

Formatted: Font: 10 pt

Furthermore, when dividing the study participants in medical staff (doctors, nurses) and students (medical students or students at the university nursing programs), we found that students (M=4.31, SD=2.11) believed to a greater extent than the medical staff (M= 3.88, SD=2.07) that official information about the virus should also be sent on social media (t (534) = -2.36, p< 0.05) (Table 13). Next, when dividing the sample by living environment, participants living in the urban area (M=4.19, SD=2.10) were inclined more than those living in the rural area (M=3.72, SD=2.05), to believe that official information could also be sent on social media (t (534) = 2.23, p< 0.05) (Table 14).

**Table 14. Significant t tests for sharing official information on social media professional degree and living environment**

|                      | Group         | N   | Mean | S. D. | t     | df  | p   | t-test for Equality of Means |                       |           |       |
|----------------------|---------------|-----|------|-------|-------|-----|-----|------------------------------|-----------------------|-----------|-------|
|                      |               |     |      |       |       |     |     | Mean Difference              | Std. Error Difference | CI4 Lower | Upper |
| Official information | Medical staff | 294 | 3.88 | 2.07  | -2.36 | 534 | .01 | -.42                         | .18                   | -.78      | -.07  |

|                                                                      |            |     |      |      |      |     |     |     |     |     |     |
|----------------------------------------------------------------------|------------|-----|------|------|------|-----|-----|-----|-----|-----|-----|
| on social media _<br>Professional<br>degree <sup>1</sup>             | Student    | 242 | 4.31 | 2.11 |      |     |     |     |     |     |     |
| Official<br>information on<br>social media<br>_living<br>environment | Urban area | 411 | 4.19 | 2.10 | 2.23 | 534 | .02 | .47 | .21 | .05 | .89 |
|                                                                      | Rural area | 125 | 3.71 | 2.05 |      |     |     |     |     |     |     |

670 <sup>1</sup>Index variable from the professional degrees of respondents. Student: medical student and student at university  
671 nursing program, Medical Staff: Senior specialist medical – doctor, Specialist medical – doctor, Resident, Nurse  
672 with higher education diploma, Nurse with other studies than higher education  
673

674 **(5) What aspects of the professional activity of the medical staff were**  
675 **affected most by the COVID – 19 pandemic?**

676 The findings of our research showed that most respondents stated that the patient – doctor  
677 relationship was most affected by the pandemic (38.4%). However, a smaller percent of  
678 respondents declared that the working schedule was the most affected (26.9%), or the  
679 collaboration with their peers (23.9%) ([S7 Tables with results to the 5<sup>th</sup> research question Table](#)  
680 [15 Table-14](#)).

681

**Table 14. The aspect of professional life which was most influenced by the pandemic**

|                                   | Frequency | Percent | Valid Percent | Cumulative Percent |
|-----------------------------------|-----------|---------|---------------|--------------------|
| patient—doctor<br>relationship    | 206       | 38.4    | 38.4          | 38.4               |
| work schedule                     | 144       | 26.9    | 26.9          | 65.3               |
| Valid collaboration with<br>peers | 128       | 23.9    | 23.9          | 89.2               |
| other                             | 58        | 10.8    | 10.8          | 100.0              |
| Total                             | 536       | 100.0   | 100.0         |                    |

682 Furthermore, taking into account the group of medical staff (doctors, nurses) and the group of  
683 students ( medical students and students at university nursing program), the results revealed  
684 that the most respondents who stated that the patient- doctor relationship was affected most  
685

686 by the pandemic was the group of medical staff (144 compared to 62) ([S7 Tables with results to](#)  
 687 [the 5<sup>th</sup> research question Table 16 Table 15](#)). One possible explanation for this result is that, by  
 688 being in constant contact with their patients, doctors and nurses were more inclined to  
 689 perceive that the relation with their patients has deteriorated during the pandemic.

690

**Table 15. Main aspect of professional life influenced by the pandemic \*  
 professional degree – Cross tabulation**

|                                                                 |                               | Professional degree <sup>‡</sup> |            | Total      |
|-----------------------------------------------------------------|-------------------------------|----------------------------------|------------|------------|
|                                                                 |                               | Medical staff                    | Student    |            |
| A3. Main aspect of professional life influenced by the pandemic | patient – doctor relationship | 144                              | 62         | 206        |
|                                                                 | work schedule                 | 70                               | 74         | 144        |
|                                                                 | collaboration with peers      | 62                               | 66         | 128        |
|                                                                 | other                         | 18                               | 40         | 58         |
| <b>Total</b>                                                    |                               | <b>294</b>                       | <b>242</b> | <b>536</b> |

691 <sup>‡</sup>index variable from the professional degrees of respondents. Student: medical student and student at university  
 692 nursing program, Medical Staff: Senior specialist medical – doctor, Specialist medical – doctor, Resident, Nurse  
 693 with higher education diploma, Nurse with other studies than higher education

694

695

696

697

## Discussion

698 During the COVID – 19 pandemic, one of the major issues people had to face, was the spread of  
 699 misinformation about the virus, its origins and its treatment. In this regard, we analyzed the  
 700 perception of medical staff (including doctors, nurses, medical students and students in the  
 701 university nursing program) about the way medical and non – medical information was  
 702 communicated during the pandemic. In the context of the so called infodemic [11], and the  
 703 effects of misinformation on people’s trust in doctors, most participants of our study declared  
 704 that the information about alternative treatments for the virus affected the credibility of health

705 professionals. Hence, from this point of view, our study is in line with previous studies which  
706 highlighted the fact that lately, trust in physician decreased [67], and which suggested that  
707 social media managed to determine people to trust the personal opinions of other people  
708 rather than the opinion of the professionals [61]. Furthermore, since other researchers pointed  
709 out that many medical practitioners used social media to express professional opinions that  
710 were later found inaccurate [74], and thus they may have contributed to the spread of  
711 misinformation [75], we argue that the credibility of physicians might have also been affected  
712 by this type of behavior.

713         An interesting result of our research showed that as the age of medical staff decreases,  
714 the extent to which they believe that information about alternative treatments affects doctors'  
715 credibility increases. Hence, younger healthcare professionals believed to a greater extent than  
716 older healthcare professionals, that information about alternative treatments affected  
717 negatively people's trust in doctors. This results might have as possible explanation, the fact  
718 that younger people tend to spend more time on social media platforms, and they may have  
719 interacted more than older professionals, with misinformation about the virus, this making  
720 them more able to be aware of the negative effects of fake news. Moreover, the type of unit in  
721 which the respondents worked, was a factor which influenced the opinion of the respondents,  
722 our findings showing that, the medical staff who did not work in unit with COVID -19 patients,  
723 believed to a greater extent than those who worked in such units, that information about  
724 alternative treatments negatively influenced doctors' credibility. Given this result we argue that  
725 is it possible for those professionals who did not interact with COVID -19 patients, and who thus

726 were more distant from the situation, to have a more distorted image regarding the way  
727 people's levels of trust in them changed in the context of the pandemic.

728         Considering the role of social media in spreading misinformation, our study is in line  
729 with previous studies which support the idea that such channels favored the communication of  
730 fake news during the pandemic [49, 50, 51]. In this regard, regardless of age, professional  
731 degree or living environment, most healthcare professionals who participated in our study were  
732 of the opinion that social media contributed to the spread of misinformation. However, our  
733 study also showed that when it comes to communicating official information on social media,  
734 younger respondents (students) believed to a greater extent than older respondents (doctors,  
735 nurses), that such channels should be used to send official information about the virus. Taking  
736 into account these results, the fact that healthcare professionals acknowledge that social media  
737 favors the spread of misinformation, and that many of them still believe they should be used in  
738 order to communicate official information, shows that at personal level, professionals were not  
739 affected that much by misinformation, them being able to differentiate more easily between  
740 real and fake news. In other words, we argue that while people in general were negatively  
741 influenced by the fake news they read on social media, as it was shown in previous studies  
742 which highlighted that people trusted the information on social networks, they shared un-  
743 validated information and had trouble with differentiating real from fake news [57, 79] or that  
744 exposure to health misinformation may influence people's intention to engage in certain  
745 behaviors [80], healthcare professionals may be less influenced by fake news, due to their  
746 knowledge.



747           Considering the knowledge of medical staff about the type of drugs that had positive  
748 effects on treating the virus, the findings of the research showed that the respondents had  
749 opinions which were in line with the results found in other studies. Hence, according to the  
750 research, most respondents stated that the drug which was known to have positive effects  
751 against the virus was Dexamethasone (46.6%), it being followed by Remdesivir (40.5%). Thus,  
752 positive effects of Dexamethasone were also highlighted by studies [31, 32], while study [35]  
753 showed positive effects of Remdesivir. Moreover, during the period in which we conducted our  
754 research, (April – June 2021), among the drugs which were approved for administration against  
755 the virus were Remdesivir, Tocilizumab – which was authorized first in June 2021, drugs which  
756 were also acknowledged by the respondents of our research. Even more, one of the authors of  
757 the article (L.R.) is a doctor and was directly involved in the process of taking care of COVID – 19  
758 patients, so the author can confirm that among the drugs which were in trial, or which were  
759 approved for administration against COVID-19 were also the drugs which were acknowledged  
760 by the respondents of our research.

761           In the context of medical staff’s knowledge about alternative treatments, most  
762 respondents declared they had heard about the fact that alcohol can prevent the infection, that  
763 warm water drunk every 15 minutes, and the hot air from the hairdryer pointed to the nostrils  
764 can help eliminate the virus. From this point of view, our study is in line with a previous study  
765 [53], which also described these methods.

766           When it comes to the respondents’ level of satisfaction about the way medical and non  
767 – medical information was communicated during the pandemic, generally, the research  
768 revealed that most respondents were dissatisfied with the communication process. In the case

769 of communication strategies adopted by authorities, the results showed that most respondents  
770 were satisfied with them. However, in the context of sending information about the drugs used  
771 to treat the disease, the research showed that younger healthcare professionals were more  
772 satisfied with the communication process than older healthcare professionals. This results  
773 might be due to the fact that physicians with more experience have higher expectations from  
774 authorities than students.

775 Another area on which we focused our research was the professional activity of the  
776 medical staff during the pandemic. In this regard, our findings revealed that, according to the  
777 respondents of our study, the aspect that was mostly affected by the pandemic was the doctor-  
778 patient relationship. Hence, our research is in line with other studies [78], which showed that  
779 the pandemic affected the way doctors interacted with their patients.

780 Furthermore, on the basis of the results of our study we argue that not only the process  
781 of vaccination created ethical issues, but also the process of communication [81]. Thus, these  
782 ethical issues were perceived by the medical staff and they would require a further examination  
783 in order to be able to create communication guides which can be regarded as essential  
784 instruments not only for the research process of the medical staff and healthcare professionals  
785 with management positions, but also for their current medical activity [82,83].

## 786 **Conclusions**

787 During the pandemic, healthcare professionals did not have to deal only with challenges  
788 regarding their health and the health of their patients, but also with the problems created by  
789 the spread of medical misinformation. ~~In this regard, besides fighting the pandemic, physician~~  
790 ~~also had to fight the so-called infodemic. Fake news spread on social media about various~~

791 ~~alternative treatments for the virus and the opinions of certain professionals about treatment~~  
792 ~~methods which later proven to be inaccurate negatively influenced the credibility of doctors.~~  
793 ~~A~~Hence, according to the main findings~~results~~ of our research, generally, the medical staff  
794 (doctors, nurses, medical students, students at university nursing program), believed that  
795 information about alternative treatments affected people's trust in doctors, but younger  
796 healthcare professionals and those working in units without COVID - 19 patients believed to a  
797 greater extent than older healthcare professionals and people working in units with COVID – 19  
798 patients that fake news about treatments for the virus affected the credibility of doctors.

799 Furthermore, regardless of age, age, gender, living environment, professional degree or  
800 working unit, the medical staff acknowledged the role of social media in spreading fake news,  
801 but when it comes to using social media in order to communicate official information, younger  
802 healthcare professionals were more inclined to believe that such networks were appropriate  
803 for the communication of official information. ~~This results can suggest that while professionals~~  
804 ~~were aware of the role of social media in spreading medical misinformation and in affecting~~  
805 ~~trust in doctors, due to their knowledge, at personal level they were less affected by that type~~  
806 ~~of information, many of them believing that social media should also be used for sending~~  
807 ~~official information.~~

808 In the context of the drugs used to treat the virus, the results pointed out that the  
809 medical staff had knowledge about the drugs known to have positive effects in treating the  
810 virus, their perception being in line with previous studies which focused on this matter.

811 ~~Moreover, the medical staff was aware of the alternative treatments which were promoted on~~

812 ~~social media, the method of drinking alcohol in order to prevent the infection being the method~~  
813 ~~that most of the respondents have heard about.~~

814           When it comes to the influence of the pandemic on the professional activity of the  
815 medical staff, the respondents declared that the aspect which was most affected was the  
816 doctor – patient relationship. In this regard, we argue that, by influencing peoples’ trust in  
817 doctors, the medical fake news spread during the pandemic, implicitly had a role in  
818 deteriorating the relation between doctors and their patients.

819           Therefore, the healthcare professionals were generally dissatisfied with the way medical  
820 and non – medical information was communicated during the pandemic, but younger  
821 professionals were satisfied than older professionals. Overall, the medical staff believed that  
822 fake news managed to undermine doctors’ credibility that social media platforms favor the  
823 spread of such news, and they had knowledge about the drugs which were known to have  
824 positive effects on the virus and about the alternative treatments.

825           Taking into account the results of the research, the paper has some theoretical and  
826 practical implications. From a theoretical point of view, the paper contributes to the literature  
827 on the matter of fake news and its influence on the trust of healthcare professionals, a strength  
828 of the paper being the fact that it analyzed the opinions of medical staff (doctors, nurses,  
829 medical students and students at university nursing program). From a practical point of view,  
830 the paper brings awareness to the phenomenon of fake news regarding medical treatments  
831 and the negative influence it has on doctors’ credibility. Another practical implication refers to  
832 the fact that the paper brings attention to the issue of using social media as a mean to  
833 communicate official information, many healthcare professionals, especially the younger ones,

834 stating that such networks could be appropriate for sharing official information. Furthermore,  
835 by highlighting that the most affected aspect of the professional activity of doctors was the  
836 relationship with their patients, the study also shows that actions need to be taken in order to  
837 restore people's trust in doctors and improve the process of communication between them.

838 ~~Hence, on the basis of the findings and implications of the study, we further discuss limitations~~  
839 ~~and future research directions.~~

840

## 841 **Limitations and future research directions**

842 While our study proved relevant information regarding the perception of healthcare  
843 professionals about the way medical and non – medical information was communicated in time  
844 of the pandemic, it also has some limitations.

845 One limitation is represented by the fact that the perception of healthcare professionals  
846 was studied only by using quantitative methods. In this regard, a future research should focus  
847 on obtaining information from doctors while using qualitative methods too. Next, the study was  
848 conducted only on Romanian healthcare professionals, and thus, a future research should take  
849 into consideration a comparison between the opinions of professionals from different  
850 countries. Another limitation is represented by the fact that we only asked respondents to state  
851 the aspect which was most influenced by the pandemic, but we did not asked them to offer  
852 detail about other type of challenges encountered. Thus, a future research should focus on  
853 analyzing the extent to which aspects of the professional activity of doctors were affected, and  
854 on analyzing more deeply the challenges they had to face during the pandemic.

855           Furthermore, since our research revealed that many respondents believed that social  
856 media platforms could be appropriate for sharing official information, we draw attention to a  
857 problem that can arise in this context. Since people know that such platforms favor the spread  
858 of fake news, if we encourage the use of social media in order to communicate official  
859 information, don't we risk to discredit that information as it is possible for people to consider  
860 that such information is fake too? We believe that this issue should be taken into account and  
861 studied in a future research.

## 862 **Author Contributions**

863 Conceptualization: Claudiu Coman, Maria Cristina Bularca

864 Data curation: Claudiu Coman, Liliana Rogozea, Angela Repanovici, Maria Cristina Bularca

865 Formal analysis: Maria Cristina Bularca, Claudiu Coman

866 Investigation: Claudiu Coman, Maria Cristina Bularca, Angela Repanovici, Liliana Rogozea

867 Methodology: Maria Cristina Bularca, Claudiu Coman

868 Project administration: Claudiu Coman, Liliana Rogozea, Angela Repanovici

869 Resources: Maria Cristina Bularca, Liliana Rogozea, Angela Repanovici

870 Supervision: Claudiu Coman, Liliana Rogozea, Angela Repanovici

871 Writing – original draft: Maria Cristina Bularca, Claudiu Coman

872 Writing – review & editing: Maria Cristina Bularca, Claudiu Coman, Liliana Rogozea, Angela

873 Repanovici

874

875

876

## 877 **References**

878 1. Sanders JM, Monogue ML, Jodlowski TZ, Cutrell J. B.Pharmacologic Treatments for

879 Coronavirus Disease 2019 (COVID-19): A Review. *JAMA*. 2020; 323(18):1824–1836.

880 doi:10.1001/jama.2020.6019

Formatted: Font: Not Italic

881 2. Shereen MA, Khan S, Kazmi A, Bashir N, Siddique R. COVID-19 infection: Origin, transmission,

882 and characteristics of human coronaviruses. *J Adv Res*. 2020; 24:91-98 doi:

883 10.1016/j.jare.2020.03.005

Formatted: Font: Not Italic

884 3. Kristina SA, Herliana N, Hanifah S. The perception of role and responsibilities during covid-19

885 pandemic: A survey from Indonesian pharmacists. *Int J Pharm Res*, 2020; 12(2). doi:

886 10.31838/ijpr/2020.SP2.369

Formatted: Font: Not Italic

887 4. World Health Organization (WHO). Timeline of WHO's response to COVID-19. [Internet].

888 World Health Organization. 2020 June 29 [cited 2020 Nov 27] Available from:

889 <https://www.who.int/news/item/29-06-2020-covidtimeline>

890 5. European Centre for Disease Prevention and Control. COVID-19 situation update worldwide,

891 as of 27 November 2020 [Internet]. European Centre for Disease Prevention and Control. 2020

892 June 29 [cited 2021 Nov 25] Available from: [https://www.ecdc.europa.eu/en/geographical-](https://www.ecdc.europa.eu/en/geographical-distribution-2019-ncov-cases)

893 [distribution-2019-ncov-cases](https://www.ecdc.europa.eu/en/geographical-distribution-2019-ncov-cases).

- 894 **6.** British Broadcasting Corporation. COVID vaccine: First 'milestone' vaccine offers 90%  
895 protection. [Internet]. 2020 Nov 9 [cited 2020 Nov 27] Available from:  
896 <https://www.bbc.com/news/health-54873105>.
- 897 **7.** Kommenda N, Jones FH. COVID vaccine tracker: when will a coronavirus vaccine be ready?  
898 [Internet]. The Guardian. 2020 Nov 10 [cited 2020 Nov 27] Available from:  
899 [https://www.theguardian.com/world/ng-interactive/2020/nov/10/covid-vaccine-tracker-when-](https://www.theguardian.com/world/ng-interactive/2020/nov/10/covid-vaccine-tracker-when-will-a-coronavirus-vaccine-be-ready)  
900 [will-a-coronavirus-vaccine-be-ready](https://www.theguardian.com/world/ng-interactive/2020/nov/10/covid-vaccine-tracker-when-will-a-coronavirus-vaccine-be-ready)
- 901 **8.** Ahsan W, Javed S, Al Bratty M, Alhazmi HA, Najmi A. Treatment of SARS-CoV-2: How far have  
902 we reached? *Drug Discov Ther.* 2020; 14(2):67-72. doi: 10.5582/ddt.2020.03008
- 903 **9.** Kupferschmidt K, Cohen J. Race to find COVID-19 treatments accelerates. *Science.* 2020;  
904 367(6485): 1412-1413. doi: 10.1126/science.367.6485.1412
- 905 **10.** World Health Organization (WHO). Solidarity clinical trial for COVID-19 treatments  
906 [Internet]. World Health Organization 2019. [cited 2020 Nov 27] Available from:  
907 [https://www.who.int/emergencies/diseases/novel-coronavirus-2019/global-research-on-novel-](https://www.who.int/emergencies/diseases/novel-coronavirus-2019/global-research-on-novel-coronavirus-2019-ncov/solidarity-clinical-trial-for-covid-19-treatments)  
908 [coronavirus-2019-ncov/solidarity-clinical-trial-for-covid-19-treatments](https://www.who.int/emergencies/diseases/novel-coronavirus-2019/global-research-on-novel-coronavirus-2019-ncov/solidarity-clinical-trial-for-covid-19-treatments)
- 909 **11.** Zarocostas J. How to fight an infodemic. *The Lancet.* 2020; 395(10225):676. doi:  
910 10.1016/S0140-6736(20)30461-X
- 911 **12.** Tuccori M, Convertino I, Ferraro S, Cappello E, Valdiserra G, Focosi D et al. The Impact of the  
912 COVID-19 “Infodemic” on Drug-Utilization Behaviors: Implications for Pharmacovigilance. *Drug*  
913 *Saf.* 2020;43:699–709 doi:10.1007/s40264-020-00965-w
- 914 **13.** Rosa SGV, Santos WC. Clinical trials on drug repositioning for COVID-19 treatment. *Rev*  
915 *Panam Salud Publica.* 2020; 44: e40 doi: 10.26633/RPSP.2020.40



916 **14.** Sahraei Z, Shabani M, Shokouhi S, Saffaei A. Aminoquinolines against coronavirus disease  
917 2019 (COVID-19): chloroquine or hydroxychloroquine. *Int J Antimicrob Agents*. 2020;  
918 105945(10.1016) doi:10.1016/j.ijantimicag.2020.105945

919 **15.** White NJ, Watson JA, Hoglund RM, Chan XHS, Cheah PY, Tarning J. COVID-19 prevention  
920 and treatment: A critical analysis of chloroquine and hydroxychloroquine clinical pharmacology.  
921 *PLoS Med*. 2020; 17(9): e1003252. doi:10.1371/journal.pmed.1003252

922 **16.** Liu J, Cao R, Xu M, Wang X, Zhang H, Hu H. et al. Hydroxychloroquine, a less toxic derivative  
923 of chloroquine, is effective in inhibiting SARS-CoV-2 infection in vitro. *Cell Discov*. 2020; 6(16)  
924 doi:10.1038/s41421-020-0156-0 .

925 **17.** Wang M, Cao R, Zhang L, Yang X, Liu J, Xu M. et.al. Remdesivir and chloroquine effectively  
926 inhibit the recently emerged novel coronavirus (2019-nCoV) in vitro. *Cell Res*. 2020; 30:269–  
927 271. doi:10.1038/s41422-020-0282-0

928 **18.** Davidescu EI, Odajiu I, Bunea T, Sandu G, Stratan L, Aramă V. et.al. Treatment with  
929 hydroxychloroquine in patients with covid-19. Experience of a neurology  
930 department. *Farmacia*. 2020; 68(4): 597-605. doi:10.31925/farmacia.2020.4.3

931 **19.** Gautret P, Lagier JC, Parola P, Meddeb L, Mailhe M, Doudier B. et.al. Hydroxychloroquine  
932 and azithromycin as a treatment of COVID-19: results of an open-label non-randomized clinical  
933 trial. *Int. J. Antimicrob. Agents*. 2020; 105949. doi:10.1016/j.ijantimicag.2020.105949.

934 **20.** Thomson K, Nachlis H. Emergency Use Authorizations During the COVID-19  
935 Pandemic: Lessons From Hydroxychloroquine for Vaccine Authorization and  
936 Approval. *JAMA*. 2020; 324(13):1282–1283. doi:10.1001/jama.2020.16253.

937 **21.** U.S Food & Drug Administration. FDA cautions against use of hydroxychloroquine or  
938 chloroquine for COVID-19 outside of the hospital setting or a clinical trial due to risk of heart  
939 rhythm problems. [Internet]. Food and Drug Administration. 2020 Jul 1 [cited 2020 Nov 27]  
940 Available from: [https://www.fda.gov/drugs/drug-safety-and-availability/fda-cautions-against-](https://www.fda.gov/drugs/drug-safety-and-availability/fda-cautions-against-use-hydroxychloroquine-or-chloroquine-covid-19-outside-hospital-setting-or)  
941 [use-hydroxychloroquine-or-chloroquine-covid-19-outside-hospital-setting-or](https://www.fda.gov/drugs/drug-safety-and-availability/fda-cautions-against-use-hydroxychloroquine-or-chloroquine-covid-19-outside-hospital-setting-or) .

942 **22.** Recovery. No clinical benefit from use of hydroxychloroquine in hospitalized patients with  
943 COVID-19. [Internet]. Recovery 2020 June 5 [cited 2020 Nov 27] Available from:  
944 [https://www.recoverytrial.net/news/statement-from-the-chief-investigators-of-the-](https://www.recoverytrial.net/news/statement-from-the-chief-investigators-of-the-randomised-evaluation-of-covid-19-therapy-recovery-trial-on-hydroxychloroquine-5-june-2020-no-clinical-benefit-from-use-of-hydroxychloroquine-in-hospitalised-patients-with-covid-19)  
945 [randomised-evaluation-of-covid-19-therapy-recovery-trial-on-hydroxychloroquine-5-june-2020-](https://www.recoverytrial.net/news/statement-from-the-chief-investigators-of-the-randomised-evaluation-of-covid-19-therapy-recovery-trial-on-hydroxychloroquine-5-june-2020-no-clinical-benefit-from-use-of-hydroxychloroquine-in-hospitalised-patients-with-covid-19)  
946 [no-clinical-benefit-from-use-of-hydroxychloroquine-in-hospitalised-patients-with-covid-19](https://www.recoverytrial.net/news/statement-from-the-chief-investigators-of-the-randomised-evaluation-of-covid-19-therapy-recovery-trial-on-hydroxychloroquine-5-june-2020-no-clinical-benefit-from-use-of-hydroxychloroquine-in-hospitalised-patients-with-covid-19) .

947 **23.** Naveed M, Uddin S, Abdullah KS, Ishaq SE, Ahmad T. Various Evidence-Based Hypothetical  
948 and Experimental Treatment Approaches and Their Effectiveness against COVID-19 Worldwide:  
949 A Comprehensive Literature Review. *EJMO* 2020; 4(4):265–285. doi:  
950 10.14744/ejmo.2020.52538

951 **24.** Chu C M, Cheng VCC, Hung IFN, Wong MML, Chan KH, Chan KS, et.al. Role of  
952 lopinavir/ritonavir in the treatment of SARS: initial virological and clinical findings. *Thorax*.  
953 2004; 59(3):252-256. doi:10.1136/thorax.2003.012658

954 **25.** Cao B, Wang Y, Wen D, Liu W, Wang J, Fan G, et al. A trial of lopinavir-ritonavir in adults  
955 hospitalized with severe covid-19. *N. Engl . J. Med.* 2020; 382(19): 1787-1799.  
956 doi:10.1056/NEJMoa2001282

957 **26.** Vosu J, Britton P, Howard-Jones A, Isaacs D, Kesson A, Khatami A, et al. Is the risk of  
958 ibuprofen or other non-steroidal anti-inflammatory drugs increased in COVID-19?. *J Paediatr*  
959 *Child Health*. 2020; 56(10): 1645-1646. doi:10.1111/jpc.15159

960 **27.** Fang L, Karakiulakis G, Roth M. Are patients with hypertension and diabetes mellitus at  
961 increased risk for COVID-19 infection? *Lancet Respir Med*. 2020; 8(4):e21.8 doi:10.1016/S2213-  
962 2600(20)30116-8

963 **28.** Science alert. Updated: WHO Now Doesn't Recommend Avoiding Ibuprofen For COVID-19  
964 Symptoms [Internet]. Science alert 2020 Mar 17 [cited 2020 Nov 27]. Available from:  
965 [https://www.sciencealert.com/who-recommends-to-avoid-taking-ibuprofen-for-covid-19-](https://www.sciencealert.com/who-recommends-to-avoid-taking-ibuprofen-for-covid-19-symptoms)  
966 [symptoms](https://www.sciencealert.com/who-recommends-to-avoid-taking-ibuprofen-for-covid-19-symptoms)

967 **29.** Esba LCA, Alqahtani RA, Thomas A, Shamas N, Alswaidan L, Mardawi G. Ibuprofen and  
968 NSAID Use in COVID-19 Infected Patients Is Not Associated with Worse Outcomes: A  
969 Prospective Cohort Study. *Infect Dis Ther*. 2020; 1-16. doi:10.1007/s40121-020-00363-w

970 **30.** Rinott E, Kozer E, Shapira Y, Bar-Haim A, Youngster I. Ibuprofen use and clinical outcomes in  
971 COVID-19 patients. *Clin Microbiol Infect*. 2020; 26(9):1259.e5-1259.e7.  
972 doi:10.1016/j.cmi.2020.06.003

973 **31.** Roberts M. Coronavirus: Dexamethasone proves first life-saving drug. [Internet]. British  
974 Broadcasting Corporation 2020 June 16 [cited 2020 Nov 27] Available from:  
975 <https://www.bbc.com/news/health-53061281>.

976 **32.** Horby P, Lim WS, Emberson JR, Mafham M, Bell JL, Linsell L, et al.. Dexamethasone in  
977 hospitalized patients with Covid-19-preliminary report. *N. Engl. J. Med*. 2020.  
978 doi:10.1056/nejmoa2021436

979 **33.** Lu CC, Chen MY, Lee WS, Chang YL. Potential therapeutic agents against COVID-19: What we  
980 know so far. *J Chin Med Assoc.* 2020; 83(6):534-536. doi: 10.1097/JCMA.0000000000000318

981 **34.** Wang Y, Zhang D, Du G, Du R, Zhao J, Jin Y, et al. Remdesivir in adults with severe COVID-19:  
982 a randomised, double-blind, placebo-controlled, multicentre trial. *The Lancet.* 2020;  
983 395(10236):1569-1578. doi:10.1016/S0140-6736(20)31022-9

984 **35.** Beigel JH, Tomashek KM, Dodd LE, Mehta AK, Zingman BS, Kalil AC. et al. Remdesivir for the  
985 treatment of Covid-19. *N. Engl. J. Med.* 2020.  
986 <https://www.nejm.org/doi/10.1056/NEJMoa2007764>

987 **36.** U.S Food and Drug Administration. FDA Approves First Treatment for COVID-19 [Internet].  
988 Food and Drug Administration 2020 Oct 22 [cited 2020 Nov 27] Available from:  
989 [https://www.fda.gov/news-events/press-announcements/fda-approves-first-treatment-covid-](https://www.fda.gov/news-events/press-announcements/fda-approves-first-treatment-covid-19)  
990 [19.](https://www.fda.gov/news-events/press-announcements/fda-approves-first-treatment-covid-19)

991 **37.** U.S Food and Drug Administration. Coronavirus (COVID-19) Update: November 20, 2020  
992 [Internet]. Food and Drug Administration 2020 Nov 20 [cited 2020 Nov 27] Available from:  
993 [https://www.fda.gov/news-events/press-announcements/coronavirus-covid-19-update-](https://www.fda.gov/news-events/press-announcements/coronavirus-covid-19-update-november-20-2020)  
994 [november-20-2020.](https://www.fda.gov/news-events/press-announcements/coronavirus-covid-19-update-november-20-2020)

995 **38.** Glasdam S, Stjernswärd S. Information about the COVID-19 pandemic—a thematic analysis of  
996 different ways of perceiving true and untrue information. *SSHOP.* 2020; (2)1: 100090.  
997 <https://doi.org/10.1016/j.ssaho.2020.100090>

998 **39.** Caleb TC, Hayes RA. Social Media: Defining, Developing, and Divining. *Atl J Commun.*2015;  
999 23:1: 46-65. <https://doi.org/10.1080/15456870.2015.972282>

1000 **40.** Boyd DM, Ellison NB. Social network sites: Definition, history, and scholarship. *J Comput*  
1001 *Mediat Commun.* 2007; 13(1): 210-230. <https://doi.org/10.1111/j.1083-6101.2007.00393.x>

1002 **41.** Reuter C, Stieglitz S, Imran M. Social media in conflicts and crises. *Behav. Inf. Technol.*  
1003 2020; 39(3): 241-251. <https://doi.org/10.1080/0144929X.2019.1629025>

1004 **42.** Vasconcellos-Silva PR, Castiel LD. COVID-19, fake news, and the sleep of communicative  
1005 reason producing monsters: the narrative of risks and the risks of narratives. *Cad Saude Publica.*  
1006 2020); 36(7): e00101920. <https://doi.org/10.1590/0102-311x00101920>

1007 **43.** Pulido CM, Ruiz-Eugeni L, Redondo-Sama G, Villarejo-Carballido B. A New Application of  
1008 Social Impact in Social Media for Overcoming Fake News in Health. *Int. J. Environ. Res. Public*  
1009 *Health.* 2020; 17(7):2430. <https://doi.org/10.3390/ijerph17072430>

1010 **44.** Al-Dmour H, Salman A, Abuhashesh M, Al-Dmour R. Influence of social media platforms on  
1011 public health protection against the COVID-19 pandemic via the mediating effects of public  
1012 health awareness and behavioral changes: integrated model. *J. Medical Internet Res.*  
1013 2020; 22(8):e19996.

1014 **45.** Wong JEL, Leo YS, Tan CC. COVID-19 in Singapore—Current Experience: Critical Global Issues  
1015 That Require Attention and Action. *JAMA.* 2020; 323(13):1243–  
1016 1244. doi:10.1001/jama.2020.2467

1017 **46.** Lazer DM, Baum MA, Benkler Y, Berinsky AJ, Greenhill KM, Menczer F, et al. The science of  
1018 fake news. *Science.* 2018; 359(6380):1094-1096. DOI: 10.1126/science.aao2998

1019 **47.** Moscadelli A, Albora G, Biamonte MA, Giorgetti D, Innocenzio M, Paoli S, et al. Fake News  
1020 and Covid-19 in Italy: Results of a Quantitative Observational Study. *Int. J. Environ. Res. Public*  
1021 *Health.* 2020; 17:5850

1022 **48.** Mian A, Khan S. Coronavirus: The spread of misinformation. *BMC Medicine*. 2020; 18(1):1-2  
1023 doi:10.1186/s12916-020-01556-3 \

1024 **49.** Pan American Health Organization. Understanding the infodemic and misinformation in the  
1025 fight against covid-19. [Internet]. Pan American Health Organization 2020 May 1 [cited 2020  
1026 Nov 27] Available from: [https://www.paho.org/en/documents/understanding-infodemic-and-](https://www.paho.org/en/documents/understanding-infodemic-and-misinformation-fight-against-covid-19)  
1027 [misinformation-fight-against-covid-19](https://www.paho.org/en/documents/understanding-infodemic-and-misinformation-fight-against-covid-19).

1028 **50.** Bowles J, Larreguy H, Liu, S. Countering misinformation via WhatsApp: Preliminary evidence  
1029 from the COVID-19 pandemic in Zimbabwe. *PloS one*. 2020; 15(10): e0240005.  
1030 <https://doi.org/10.1371/journal.pone.0240005>

1031 **51.** Ittefaq M, Hussain SA, Fatima M. COVID-19 and social-politics of medical misinformation on  
1032 social media in Pakistan. *Media Asia*. 2020; 47(1-2): 75-80.  
1033 <https://doi.org/10.1080/01296612.2020.1817264>

1034 **52.** The National Law Review. There's a Fake News Pandemic. Could COVID-19 and Trademarks  
1035 be the Cure? [Internet]. The National Law Review 2020 Jul 7 [cited 2020 Nov 27] Available from:  
1036 [https://www.natlawreview.com/article/there-s-fake-news-pandemic-could-covid-19-and-](https://www.natlawreview.com/article/there-s-fake-news-pandemic-could-covid-19-and-trademarks-be-cure)  
1037 [trademarks-be-cure](https://www.natlawreview.com/article/there-s-fake-news-pandemic-could-covid-19-and-trademarks-be-cure)

1038 **53.** O'connor C, Murphy M. Going Viral: Doctors Must Combat Fake News in the Fight against  
1039 Covid-19. *Ir Med J*. 2020; 113(5): 85-85.

1040 **54.** Pew Research Center. Nearly three-in-ten Americans believe COVID-19 was made in a lab.  
1041 [Internet]. Pew research center 2020 April 8 [cited 2020 Nov 27] Available from:  
1042 [https://www.pewresearch.org/fact-tank/2020/04/08/nearly-three-in-ten-americans-believe-](https://www.pewresearch.org/fact-tank/2020/04/08/nearly-three-in-ten-americans-believe-covid-19-was-made-in-a-lab/)  
1043 [covid-19-was-made-in-a-lab/](https://www.pewresearch.org/fact-tank/2020/04/08/nearly-three-in-ten-americans-believe-covid-19-was-made-in-a-lab/)

1044 **55.** Health Analytics Asia. 50 Fake 'frequently forwarded' COVID-19 WhatsApp messages.  
1045 [Internet]. Health Analytics Asia 2020 April 2 [cited 2020 Nov 27] Available from:  
1046 <https://www.ha-asia.com/50-fake-frequently-forwarded-covid-19-whatsapp-messages/>

1047 **56.** Brennen JS, Simon F, Howard PN, Nielsen RK. Types, sources, and claims of COVID-19  
1048 misinformation. *Reuters Institute*. 2020; 7: 1-13.

1049 **57.** Pennycook G, McPhetres J, Zhang Y, Lu JG, Rand DG. Fighting COVID-19 misinformation on  
1050 social media: Experimental evidence for a scalable accuracy-nudge intervention. *Psychol*.  
1051 2020; 31(7): 770-780. <https://doi.org/10.1177/0956797620939054>

1052 **58.** Barua Z, Barua S, Aktar S, Kabir N, Li M. Effects of misinformation on COVID-19 individual  
1053 responses and recommendations for resilience of disastrous consequences of  
1054 misinformation. *Prog Disaster Science*. 2020; 8: 100119. doi:10.1016/j.pdisas.2020.100119

1055 **59.** Ahmed N, Shahbaz T, Shamim A, Khan KS, Hussain SM, Usman A. The COVID-19 Infodemic:  
1056 A Quantitative Analysis Through Facebook. *Cureus*. 2020; 12(11): e11346. doi:  
1057 10.7759/cureus.11346

1058 **60.** Nagler RH, Vogel RI, Gollust SE, Rothman AJ, Fowler EF, Yzer MC. Public perceptions of  
1059 conflicting information surrounding COVID-19: Results from a nationally representative survey  
1060 of US adults. *PloS one*. 2020; 15(10): e0240776. doi:10.1371/journal.pone.0240776

1061 **61.** Orso D, Federici N, Copetti R, Vetrugno L, Bove T. Infodemic and the spread of fake news in  
1062 the COVID-19-era. *Eur J Emerg Med*. 2020; 27(5):327-328. doi:10.1097/MEJ.0000000000000713

1063 **62.** McNab C. What social media offers to health professionals and citizens. *Bull World Health*  
1064 *Organ*. 2009; 87(8):566. doi:10.2471/blt.09.066712

1065 **63.** Ma X, Vervoort D, Luc JG. When misinformation goes viral: access to evidence-based  
1066 information in the COVID-19 pandemic. *J. Glob. Health. Sci.* 2020; 2(1):e13  
1067 doi:10.35500/jghs.2020.2.e13

1068 **64.** Tasnim S, Hossain MM, Mazumder H. Impact of rumors and misinformation on COVID-19 in  
1069 social media. *J Prev Med Public Health.* 2020; 53(3):171-174.

1070 **65.** Bode L, Vraga EK. See something, say something: Correction of global health misinformation  
1071 on social media. *J Health Commu.* 2018; 33(9):1131-1140.  
1072 doi:10.1080/10410236.2017.1331312

1073 **66.** Chou WYS, Oh A, Klein WM. Addressing health-related misinformation on social  
1074 media. *Jama.* 2018; 320(23): 2417-2418. doi:10.1001/jama.2018.16865.

1075 **67.** Stasiuk K, Polak M, Dolinski D, Maciuszek J. The credibility of health information sources as  
1076 predictors of attitudes toward vaccination—the results from a longitudinal study in  
1077 Poland. *Vaccines.* 2021; 9(8):933 doi: 10.3390/vaccines9080933

1078 **68.** Cernicova-Buca M, Palea A. An appraisal of communication practices demonstrated by  
1079 romanian district public health authorities at the outbreak of the COVID-19  
1080 pandemic. *Sustainability.* 2021; 13(5): 1-19, doi: 10.3390/su13052500

1081 **69.** Tagliacozzo S, Albrecht F, Ganapati NE. International Perspectives on COVID-19  
1082 Communication Ecologies: Public Health Agencies' Online Communication in Italy, Sweden, and  
1083 the United States. *Am Behav Sci.* 2021; 65(7), 934-955 doi: 10.1177/0002764221992832

1084 **70.** Saechang O, Yu J, Li Y. Public trust and policy compliance during the COVID-19 pandemic:  
1085 The role of professional trust. *Healthcare.* 2021; 9 (2):1-13 doi: 10.3390/healthcare9020151.



1086 **71.** Lewandowski R, Goncharuk AG, Cirella GT. Restoring patient trust in healthcare: medical  
1087 information impact case study in Poland. *BMC Health Serv. Res.* 2021; 21(1):1-11 doi:  
1088 10.1186/s12913-021-06879-2

1089 **72.** Soveri A, Karlsson LC, Antfolk J, Lindfelt M, Lewandowsky S. Unwillingness to engage in  
1090 behaviors that protect against COVID-19: the role of conspiracy beliefs, trust, and endorsement  
1091 of complementary and alternative medicine. *BMC Public Health.* 2021; 21(1): 1-12 doi:  
1092 10.1186/s12889-021-10643-w

1093 **73.** Antinyan A, Bassetti T, Corazzini L, Pavesi F. Trust in the health system and COVID-19  
1094 treatment. *Front. Psychol.* 2021; 12:1-14 doi:10.3389/fpsyg.2021.643758

1095 **74.** Law RW, Kanagasigam S, Choong KA. Sensationalist social media usage by doctors and  
1096 dentists during Covid-19. *Digit. Health.* 2021; 7:1-12 doi: 10.1177/20552076211028034

1097 **75.** Leonard MB, Pursley DM, Robinson LA, Abman SH, Davis JM. The importance of  
1098 trustworthiness: lessons from the COVID-19 pandemic. *Pediatr. Res.* 2021; 1-4  
1099 doi:10.1038/s41390-021-01866-z

1100 **76.** Wood JL, Lee GY, Stinnett SS, Southwell BG. A Pilot Study of Medical Misinformation  
1101 Perceptions and Training Among Practitioners in North Carolina (USA). *INQUIRY: The Journal of*  
1102 *Health Care Organization, Provision, and Financing*, 2021; 58:1-6 doi:  
1103 10.1177/00469580211035742

1104 **77.** Gopichandran V, Sakthivel K. Doctor-patient communication and trust in doctors during  
1105 COVID 19 times—A cross sectional study in Chennai, India. *Plos One.* 2021: 16(6), 1-11 doi:  
1106 10.1371/journal.pone.0253497

1107 **78.** Nwoga HO, Ajuba, MO, Ezeoke UE. Effect of COVID-19 on doctor-patient relationship. *Int J*  
1108 *Community Med Public Health.* 2020; 7(12): 2394-6040, doi: 10.18203/2394-  
1109 6040.ijcmph20205136

1110 **79.** Rocha YM, de Moura GA, Desidério GA, de Oliveira CH, Lourenço FD, de Figueiredo NLD. The  
1111 impact of fake news on social media and its influence on health during the COVID-19 pandemic:  
1112 A systematic review. *J. Public Health.* 2021; 1-10 doi:10.1007/s10389-021-01658-z

1113 **80.** Greene CM, Murphy G. Quantifying the effects of fake news on behavior: Evidence from a  
1114 study of COVID-19 misinformation. *J Exp Psychol Appl.* 2021 Dec;27(4):773-784. doi:  
1115 10.1037/xap0000371.

1116 **81.** Rogozea LM, Sechel G, Bularca MC, Coman C, Cocuz ME. Who's Getting Shots First? Dealing  
1117 With the Ethical Responsibility for Prioritizing Population Groups in Vaccination. *Am J Ther.*  
1118 2021 Jun 22;28(4):e478-e487. doi: 10.1097/MJT.0000000000001400. PMID: 34228653.

1119 **82.** Rogozea L, Purcaru D, Leașu F, Nemet C. Biomedical research - opportunities and ethical  
1120 challenges. *Rom J Morphol Embryol.* 2014;55(2 Suppl):719-22. PMID: 25178352.

1121 **83.** Olimid AP, Rogozea LM, Olimid DA. Ethical approach to the genetic, biometric and health  
1122 data protection and processing in the new EU General Data Protection Regulation (2018). *Rom J*  
1123 *Morphol Embryol.* 2018;59(2):631-636. PMID: 30173275.

## 1124 **Supporting information**

1125 S1 Appendix English version of the questionnaire

1126 (docx)

1127 S2 Appendix Romanian version of the questionnaire

1128 (docx)

1129 S3 Tables with results to the 1<sup>st</sup> research question

1130 S4 Tables with results to the 2<sup>nd</sup> research question

1131 S5 Tables with results to the 3<sup>rd</sup> research question

1132 S6 Tables with results to the 4<sup>th</sup> research question

1133 S7 Tables with results to the 5<sup>th</sup> research question

Formatted: Superscript

Formatted: Superscript

## Rebuttal letter

Claudiu Coman

Transilvania University of Brasov

[claudiu.coman@unitbv.ro](mailto:claudiu.coman@unitbv.ro)

Dear Sir/Madam

With this cover letter we submit the revised manuscript, initially entitled "Challenges in the communication process during the COVID-19 pandemic- a perspective of medical staff", and after complying with the suggestions of the reviewers, entitled "Misinformation about medication during the COVID – 19 pandemic: a perspective of medical staff" by Claudiu Coman, Maria Cristina Bularca, Angela Repanovici and Liliana Rogozea for publication in PLOS ONE.

We revised the manuscript according to the suggestions and recommendation made by the reviewers. We would like to thank the reviewers for taking time to review our paper and for providing such useful suggestions. We also thank the academic editor for reviewing our paper. We tried to comply with all the suggestions and recommendations made by the reviewers, and in this letter, we describe the changes we made to the text according to the recommendations of the reviewers.

Our manuscript needed major revisions. The changes were made while having active the "Track changes" function from Microsoft Word and the lines where the text was changed can be best viewed while having active the "All markup" option. Moreover, in order for our changes to be best seen, we will also provide in this cover letter, the lines from the revised manuscript with the "Track changes" function, and "All markup" option active. With regards to our response to Reviewer 1, the reviewer made a series of suggestions directly in the PDF version of our initial manuscript, but also provided a summary of those suggestions in the e-mail which was sent by the journal to the corresponding author. In this regard, we responded first to the comments highlighted in the summary from the e-mail, and then we responded to each point made by Reviewer 1 in the PDF version of our initial manuscript. Next, we responded to each point raised by Reviewer 2.

### **Our response to Reviewer 1:**

We firstly thank the reviewer for taking time to review our manuscript and provide suggestions in order to improve it. We addressed all the suggestions made by the reviewer. When we describe how the text was changed, we also provide the lines where the text can be found in the revised manuscript with the option "Track changes" active. In this way, the changes can be viewed completely (the text we deleted, and the text we inserted). Next, we will firstly describe our answers to the comments which were summarized in the e-mail received by the corresponding author, and then we will present our responses to the comments made by the reviewer in the PDF version of our manuscript.

## **Reviewer 1 comments- as summarized in the email received by the corresponding author**

**Reviewer 1 point 1:** the review comments attached. The required modifications can be summarized as following and the authors will find it in details in the attached file: the authors should review the journal guidelines and abide by it in manuscript preparation.

**Response 1:** We are grateful to the reviewer for the suggestion. We reviewed the guidelines of PLOS ONE journal again and we made sure our manuscript is prepared in accordance to the author guidelines which can be found on the journal's official website. We also checked the pdf files entitled "Download sample title, author list, and affiliation page" and "Download sample manuscript body", in order to make sure our manuscript is correctly formatted. Thus, we looked again at the guidelines for the sections which have to be included in the manuscript, the font and sizes for headings, table captions, referencing rules, etc., and we made sure our manuscript respects the guidelines of the journal.

**Reviewer 1 point 2:** the introduction section is too long and need to be summarized.

**Response 2:** We thank the reviewer for the useful suggestion. In order to comply with it, we tried to summarize our introduction. Thus, we would like to mention that we also took into account the comments the reviewer made in the pdf version of the manuscript. In this regard, there the reviewer recommended us to rephrase the first paragraph of our paper because the paragraph was not about the communication process: "the introductory paragraph is not related to communication process". We rephrased the paragraph and we added information in which we highlighted the fact that the COVID – 19 pandemic negatively influenced the communication process. The changes we made, the text deleted, added or rephrased can be best seen while having active the "Track changes" function and the "All markup" option provided by Microsoft Word. Thus, in the Introduction section of the paragraph, page 4 of the manuscript, lines 71-77, we made changes to the text, and the new introductory paragraph also addresses the subject of communication:

"The COVID 19 pandemic generated multiple changes in the way today's society members carry out their daily activities. One of the processes which was mostly affected by the pandemic was the communication process between institutions and the public, as well as between individuals. In this regard, from this perspective, while many domains were affected by the spread of the virus, such as the educational system or the cultural sector, the health sector was the one that faced the most challenges [1]."

Next, in the pdf version of our manuscript, the reviewer suggested that the details we gave regarding the virus could be summarized in one paragraph: "the history of covid-19 can be summarized in a single paragraph". In order to comply with the request, in the Introduction section, at page 4 of the manuscript, we summarized the text indicated by the reviewer.

The text the reviewer suggested us to summarize:

"Caused by severe acute respiratory syndrome coronavirus 2 (SARS-CoV-2) [2], the disease was firstly detected in December 2019, in Wuhan, China [3], and it fastly spread all over the world. The World Health Organization was informed about a pneumonia outbreak in Wuhan on December 31 2019, the number of cases continued to increase, and on March 11 2020 the World

Health Organization characterized COVID 19 as a pandemic [4]. Being highly contagious, the virus affected a large number of people, and as of November 27 over 61 million cases were reported [5]. Even though many companies and institutions are struggling to develop a vaccine, Pfizer, Gamaleya Research Institute, University of Oxford, and a preliminary analysis of the vaccine proposed by Pfizer showed that the vaccine is able to prevent more than 90% of people from getting infected with COVID 19 [6], so far no vaccine was approved as a general and universal vaccine against COVID 19 [7]. Ever since the pandemic was declared, finding the right treatment for the virus has become a priority for researchers and doctors from all over the world. In this regard, large number of trials started to be conducted, and in order to find an efficient drug treatment against the virus, one method that was adopted was testing and administrating to patients, drugs that were previously used for curing other viruses [8]. Thus, on March 20 2020, The World Health Organization launched the SOLIDARITY clinical trial, a trial that monitored the effects on patients infected with COVID 19, of specific drugs that proven to be effective in the treatment of other diseases: remdesivir, interferon beta, chloroquine and hydroxychloroquine -previously used for Malaria, as well as drugs used on HIV patients: lopinavir and ritonavir [9]. However, according to the interim results published on October 15 2020 by WHO, even though those drugs were taught to have positive effects on treating COVID 19, they had little influence or no influence at all on mortality in general, on the need and initiation of ventilation and on the recovery process [10].”

The way we summarized the text can be seen at lines 102-114- in the revised version of our manuscript (The full change, the text deleted and the text summarizes is visible at lines 78-114).

The text we summarized (lines 102 -114 with the “Track changes” and “All Markup” option active:

“Caused by severe acute respiratory syndrome coronavirus 2 [2], the disease was firstly detected in December 2019, in Wuhan, China [3]. Due to the evolution of the virus, the World Health Organization declared the pandemic in March 2020 [4], and as of November 27 over 61 million cases were reported [5]. In this regard, although several companies are struggling to develop a vaccine, and some of the proposed vaccines showed promising results [6], so far no vaccine was approved in order to be administrated to the entire population [7]. Ever since the pandemic was declared, many companies started to be preoccupied with finding a treatment, and one method used that was adopted was administrating to patients, drugs that were previously used for curing other viruses [8]. Thus, one of the most well - known trials started was the SOLIDARITY trial, which focused on using various drugs including chloroquine and hydroxychloroquine, lopinavir or ritonavir [9]. However, even if those drugs were taught to have positive effects on treating the virus, they did not have a significant influence on preventing mortality in general [10]”.

Next, in order to reduce the information written in the Introduction section, as the reviewer suggested, we also deleted the last paragraph of the Introduction section, paragraph in which we provided details about the concepts that we addressed next in the Literature review section. Thus, at lines 118 – 122 in the revised manuscript with “Track changes” and “All Markup” option active, we deleted the following text:

“Hence, considering the purpose of our paper and the research questions, we believed it was necessary to analyze the literature on the drugs used to treat COVID – 19, on the role of social

media platforms in spreading fake information about the virus and potential treatments, and on the way the pandemic influenced the credibility of doctors and their relationship with their patients.”

**Reviewer 1 point 3:** the section titles need to be reviewed and fixed.

**Response 3:** We thank the reviewer for the useful suggestion. We checked again the author guidelines provided by the journal on its official website, regarding sections of the manuscript. In this regard, we corrected the section which was entitled “Methods and materials” in the initial version of our manuscript, with the correct form, which is “Materials and methods”. The change can be seen in the revised manuscript at page 17, line 364, while having active the “Track changes” and “All markup” options from Microsoft Word. We reviewed all of our section titles and made sure they are correct.

**Reviewer 1 point 4:** the results section include too much tables need to be focusing on the most significant tables and attach the other tables as supplementary tables.

**Response 4:** We are grateful to the reviewer for such useful suggestion. We addressed the suggestion, we looked at the tables included in the Results section and we integrated in the section only the most significant tables. The other tables were deleted from the text and added to supplementary information. Thus, we created Word documents with supplementary information for each of our research questions. In this regard in S3\_Tables with results to the 1<sup>st</sup> research question we included Table 2 ; in S4\_Tables with results to the 2<sup>nd</sup> research question we included Table 5 and Table 6; in S5\_Tables with results to the 3<sup>rd</sup> research question we included Table 7 and Table 9; in S6\_Tables with results to the 4<sup>th</sup> research question we included Table 11 and Table 12; in S7\_Tables with results to the 5<sup>th</sup> research question we included Table 15 and Table 16.

**Reviewer 1 point 5:** the methods section is missing the research design, sampling method and the calculation of the study sample and the validity and reliability section.

**Response 5:** We are very grateful to the reviewer for suggesting us to improve the methods section of our paper. With regards to the research design section, we added this section to our manuscript and we explained in detail the research design. Even more, we deleted some information from the Sampling and data collection procedures and we added it to the research design section because it was more suitable there. In this regard, at pages 17-18 of the manuscript, between lines 365- 385 can be found the Research design section of our paper, which comprises the following text:

“The present study was conducted on Romanian healthcare professionals including doctors, nurses and medical students. The method used is quantitative. The questionnaire was administrated online, the data was collected through the help of Google forms, and was disseminated on groups of healthcare professionals and students on platforms such as Facebook and WhatsApp, during the period April 2021– June 2021. The data we collected was firstly exported to Microsoft Excel, and then it was analyzed with IBM Statistical Package for the Social Sciences, version 20. The respondents were informed about the purpose of the study, about the fact that they were allowed to withdraw at any time, and they were asked to give their consent for participating in the study. The average time needed to complete the questionnaire was 15 minutes. Considering the validity

of our research, we took into account the theoretical information from the literature regarding the development of a questionnaire. Our team of researchers together with health specialists have configured the dimensions, and operationalized the concepts in accordance with the theoretical approaches identified at the current stage of the research. Even more, we pre-tested the questionnaire before disseminating in order to guarantee the validity of the instrument. Thus, the questionnaire was completed by 50 respondents in the pre-testing stage. Considering the reliability of the research, we used split half reliability method. We split our sample in half, and we checked the variables in from our sub-samples in order to see if the variables provided convergent results. The convergent results we obtained by applying the split half method showed that we obtained a high fidelity measurement.

In order to create the research design section and to also improve the way our paper is structured, we made changes to the section “Sampling and data collection procedures”. In this regard, we deleted some text and we reformulated some phrases. The section comprises the following text, which can be found at pages 17-18 of the revised manuscript with “Track changes” and “All markup” option active, lines 419-427:

“In order to conduct the research we used a quantitative method while having as an instrument a questionnaire. The responses were collected online, with the help of Google forms, and the questionnaire was self – administrated. The research received approval from The Council of the Faculty of Sociology and Communication, approval request Nr.378/30.03.2021. Taking into account the sampling method and the calculation of the study sample, we used random, probabilistic sampling method. We took into consideration specialists, physicians, and medical students from Brasov, and we applied the snowballing method in order to disseminate the questionnaire. The sample of our study comprises 536 respondents, and included doctors, nurses as well as medical students from Romania.”

With regards to the sampling method, we would like to thank the reviewer for pointing out that we should give more information about the sampling procedure. Even though in the initial version of our manuscript we described the sample of our research, how the questionnaire was distributed and to whom, we added more specific information about the sampling method. Hence, at page 20 of the manuscript, lines 423 - 426, we explained that we used a random, probabilistic sampling method:

“Taking into account the sampling method and the calculation of the study sample, we used random, probabilistic sampling method. We took into consideration specialists, physicians and medical students from Brasov, and we applied the snowballing method in order to disseminate the questionnaire.”

**Reviewer 1 point 6:** the conclusion section need to be summarized and conclude the main study findings and its significance.

**Response 6:** We are grateful to the reviewer for the suggestion. In order to comply with it we tried to summarize our Conclusions section, to highlight again the main findings of the research and the significance of our study. In this regard, the text which was written in Conclusions in the initial



version of our manuscript was improved. In this regard, we deleted some of the redundant information which was written in this section. The information we deleted:

“In this regard, besides fighting the pandemic, physician also had to fight the so called infodemic. Fake news spread on social media about various alternative treatments for the virus and the opinions of certain professionals about treatment methods which later proven to be inaccurate negatively influenced the credibility of doctors.” (Lines 789-792)

“This results can suggest that while professionals were aware of the role of social media in spreading medical misinformation and in affecting trust in doctors, due to their knowledge, at personal level they were less affected by that type of information, many of them believing that social media should also be used for sending official information” (lines 803-807)

“Moreover, the medical staff was aware of the alternative treatments which were promoted on social media, the method of drinking alcohol in order to prevent the infection being the method that most of the respondents have heard about” (lines 811-813).

“Hence, on the basis of the findings and implications of the study, we further discuss limitations and future research directions.” (Lines 838-839).

Next, we took into account the recommendation of the reviewer and we started the section by presenting the main findings of our research. Since we had several research questions, we presented our main findings in relation to those research questions. Next, the reviewer recommended us to explain the significance of our study. Thus, in the paper we had already written the theoretical and practical implication of our paper. In this regard, we did not delete the implications because we consider that the implications emphasize why the study conducted is important and how it can be further taken into consideration. Next, we did not delete the limitations and future research directions either, because we considered necessary to highlight how and why our study has limitations but also how it could be further developed or extended.

**Reviewer 1 point 7:** the references are too much need to be filtered and summarized to 30 or 40 references maximum. Regards

**Response 7:** We are very grateful to the reviewer for this recommendation and we appreciated the interest in improving our paper. However, when we started to write the article, we wanted to make sure our paper will be well documented and that it will address all the theoretical concepts and aspects needed. In this regard, we made a thorough research and literature review on the medication used in order to treat the virus, on the way social media contributed to the spread of misinformation about the virus, and on the way trust in doctors and the doctor- patient relation was affected during the pandemic. Thus, we read many research paper because we wanted for our paper to provide an overall view on the subject addressed. In this regard, we consider that all the references we used are relevant for the subject approached and for the research that we conducted, and therefore we could not delete more than half of them. In other words, through the references cited we support and sustain our arguments, we show how other researchers approached similar matters and thus we could not delete more than half of our references because we considered that by deleting them we could no longer have a strong and well consolidated theoretical background

and we could not properly explain how we wanted to address the matter of medical misinformation and its effects from the perspective of medical staff. Even more, the journal does not have a limitation regarding the length of the article or the number of references: “Manuscripts can be any length. There are no restrictions on word count, number of figures, or amount of supporting information”. In addition, we have seen articles which addressed subjects related to health and the COVID – 19 pandemic, and which were published in PLOS ONE, that have more than 40 references. For example, one article entitled “Severity of infection with the SARS- CoV -2 B1.1.7 lineage among hospitalized COVID – 19 patients in Belgium” (<https://journals.plos.org/plosone/article?id=10.1371/journal.pone.0269138>), has 76 references, and another article, entitled “The coronavirus disease 2019 (COVID -19) vaccination psychological antecedent assessment using the ARABIC 5c validated tool: An online survey in 13 Arab countries” (<https://journals.plos.org/plosone/article?id=10.1371/journal.pone.0260321>) has 71 references.

### **Reviewer 1 comments- as pointed by the reviewer in the PDF version of our manuscript**

**Reviewer 1 point 1:** A perspective of medical staff

**Response 1:** We thank the reviewer for the suggestion. We put “:” instead of “-“ in our title, before the phrase “a perspective of medical staff”. The change can be seen at line 2 of the revised manuscript.

**Reviewer 1 point 2:** the abstract need to be summarized to 250 to 300 words by the main important information in each part ...it is recommended to avoid long paragraphs and to paraphrase and summarize the ideas in short paragraphs.

**Response 2:** We are grateful to the reviewer for the recommendation. In order to comply with it we summarized our abstract to 219 words. In this regard, we deleted the text which was written in the Abstract section, and instead, at page 3 of the revised manuscript with “Track changes” and “All markup” option on, at lines 50 –68 we inserted the following text:

“Background. Healthcare professionals had to face numerous challenges during the pandemic, their professional activity being influenced not only by the virus, but also by the spread of medical misinformation. In this regard, we aimed to analyze, from the perspective of medical staff, the way medical and non - medical information about the virus was communicated during the pandemic in order to raise awareness about the way misinformation affected the medical staff.

Methods and findings. The study was conducted on Romanian healthcare professionals. They were asked to answer to a questionnaire and the sample of the research includes 536 respondents. The findings revealed that most respondents stated that information about alternative treatments against the virus affected the credibility of health professionals, and that younger professionals believed to a greater extent that trust in doctors was affected. The research also showed that respondents were well informed about the drugs used in clinical trials in order to treat the virus.

Conclusions. Healthcare professionals declared that the spread of misinformation regarding alternative treatments, affected their credibility and the relationship with their patients. Healthcare professionals had knowledge about the drugs used in clinical trials, and they acknowledged the

role of social media in spreading medical misinformation. However, younger professionals also believed that social media could be used to share official information about the virus.”

**Reviewer 1 point 3:** the introductory paragraph is not related to communication process.

**Response 3:** We thank the reviewer for pointing this out. We explained how we addressed this point above in this Cover letter, in point 2 raised by the reviewer in the summary which was written in the e-mail sent to the corresponding author. However, we will present again the way we changed the introductory paragraph in order for it to be related to communication process. In this regards, in the Introduction section of the paragraph, page 4 of the manuscript with “Track changes” and “All markup active”, lines 71-77, we made changes to the text, and the new introductory paragraph also addresses the subject of communication:

“The COVID 19 pandemic generated multiple changes in the way today’s society members carry out their daily activities. One of the processes which was mostly affected by the pandemic was the communication process between institutions and the public, as well as between individuals. In this regard, from this perspective, while many domains were affected by the spread of the virus, such as the educational system or the cultural sector, the health sector was the one that faced the most challenges [1].”

**Reviewer 1 point 4:** the history of covid-19 can be summarized in a single paragraph.

**Response 4:** We are very grateful to the reviewer for the recommendation. We tried to comply with it and we summarized the history of COVID -19. Earlier in this cover letter we explained how we addressed this point because the reviewer also mentioned it in the summary which was written in the e-mail sent to the corresponding author. In this regard, we summarized the indicated text, and at page 5 of the manuscript with “Track changes” and “All markup” option active, lines 102-114 we added the following text:

“Caused by severe acute respiratory syndrome coronavirus 2 [2], the disease was firstly detected in December 2019, in Wuhan, China [3]. Due to the evolution of the virus, the World Health Organization declared the pandemic in March 2020 [4], and as of November 27 over 61 million cases were reported [5]. In this regard, although several companies are struggling to develop a vaccine, and some of the proposed vaccines showed promising results [6], so far no vaccine was approved in order to be administrated to the entire population [7]. Ever since the pandemic was declared, many companies started to be preoccupied with finding a treatment, and one method used that was adopted was administrating to patients, drugs that were previously used for curing other viruses [8]. Thus, one of the most well - known trials started was the SOLIDARITY trial, which focused on using various drugs including chloroquine and hydroxychloroquine, lopinavir or ritonavir [9]. However, even if those drugs were taught to have positive effects on treating the virus, they did not have a significant influence on preventing mortality in general [10]”.

**Reviewer 1 point 5:** the study aim is to assess the perception and this other aim is not included as an intervention, so it is better to rephrased as to recommend future researches or interventions to raise.....

**Response 5:** We thank the reviewer for the useful suggestion. We tried our best in addressing the recommendation. In this regard, we rephrased the part of the purpose indicated by the reviewer. In other words, the reviewer suggested us to rephrase the last part of our purpose, to rephrase the expression “in order to raise awareness about the way misinformation affected medical staff”. Hence, at page 6 of the manuscript with “Track changes” and “All Markup” option active, lines 129 –133 we rephrased the purpose and added the following text:

“The purpose of the paper is to analyze, from the perspective of medical staff, the way medical and non - medical information about the virus was communicated during the pandemic to encourage the development of future research or interventions in order to raise awareness about the way misinformation affected medical staff.”

Due to the suggestion of the reviewer, we had to change the way we described the purpose of our paper in other sections of our manuscript too. Thus, the purpose of the paper was changed in the way recommended by the reviewer, also at lines: 52 -55 (in the Abstract section).

**Reviewer 1 point 6:** please to consider the restructuring of the manuscript as per the journal guidelines and the title of each section. Also, the literature review section is very long and it should be fixed to be not more than 2 to 2 and half pages summarizing the main ideas.

**Response 6:** We are very grateful to the reviewer for suggesting us to check again the guidelines of the journal. As we previously explained in this Cover letter, (due to the fact that the same point was also highlighted by the reviewer in the summary which was written in the e-mail sent to the corresponding author), we checked again the guidelines and made sure our manuscript is formatted according to the guidelines. We also checked again the titles of the section which should be included in the manuscript, and at page 17 of the revised manuscript with “Track changes” and “All markup” option active, line 364 we changed “Methods and materials” to “Materials and methods”.

With regards to summarizing our Literature review and deleting references from our paper, we present again the explanation we gave earlier in the Cover letter, at point 7 made by the reviewer in the e-mail sent to the corresponding author:

We are very grateful to the reviewer for this recommendation and we appreciated the interest in improving our paper. However, when we started to write the article, we wanted to make sure our paper will be well documented and that it will address all the theoretical concepts and aspects needed. In this regard, we made a thorough research and literature review on the medication used in order to treat the virus, on the way social media contributed to the spread of misinformation about the virus, and on the way trust in doctors and the doctor- patient relation was affected during the pandemic. Thus, we read many research paper because we wanted for our paper to provide an overall view on the subject addressed. In this regard, we consider that all the references we used are relevant for the subject approached and for the research that we conducted, and therefore we could not delete more than half of them. In other words, through the references cited we support and sustain our arguments, we show how other researchers approached similar matters and thus we could not delete more than half of our references because we considered that by deleting them

we could no longer have a strong and well consolidated theoretical background and we could not properly explain how we wanted to address the matter of medical misinformation and its effects from the perspective of medical staff. Even more, the journal does not have a limitation regarding the length of the article or the number of references: “Manuscripts can be any length. There are no restrictions on word count, number of figures, or amount of supporting information”. In addition, we have seen articles which addressed subjects related to health and the COVID – 19 pandemic, and which were published in PLOS ONE, that have more than 40 references. For example, one article entitled “Severity of infection with the SARS- CoV -2 B1.1.7 lineage among hospitalized COVID – 19 patients in Belgium” (<https://journals.plos.org/plosone/article?id=10.1371/journal.pone.0269138>), has 76 references, and another article, entitled “The coronavirus disease 2019 (COVID -19) vaccination psychological antecedent assessment using the ARABIC 5c validated tool: An online survey in 13 Arab countries” (<https://journals.plos.org/plosone/article?id=10.1371/journal.pone.0260321>) has 71 references.

**Reviewer 1 point 7:** Research Design (please to review examples of the journal manuscript preparation)

**Response 7:** We thank the reviewer for pointing out that we should describe more thoroughly the Research design of our paper. We explained how we addressed this suggestion earlier in this Cover letter, because the reviewer highlighted the suggestion in the summary from the e-mail sent to the corresponding author too. However, we will present again the way we complied with the suggestion. We did review examples of the journal manuscript preparation, and after we had done so, we deleted some text from the section “Sampling and data collection procedures” and moved it to the new section created. In this regard, at pages 17-18 of the revised manuscript with “Track changes” and “All markup” option active, lines 365-385, we inserted a sub-section entitled “Research design” which comprises the following text:

“The present study was conducted on Romanian healthcare professionals including doctors, nurses and medical students. The method used is quantitative. The questionnaire was administered online, the data was collected through the help of Google forms, and was disseminated on groups of healthcare professionals and students on platforms such as Facebook and WhatsApp, during the period April 2021– June 2021. The data we collected was firstly exported to Microsoft Excel, and then it was analyzed with IBM Statistical Package for the Social Sciences, version 20. The respondents were informed about the purpose of the study, about the fact that they were allowed to withdraw at any time, and they were asked to give their consent for participating in the study. The average time needed to complete the questionnaire was 15 minutes. Considering the validity of our research, we took into account the theoretical information from the literature regarding the development of a questionnaire. Our team of researchers together with health specialists have configured the dimensions, and operationalized the concepts in accordance with the theoretical approaches identified at the current stage of the research. Even more, we pre-tested the questionnaire before disseminating in order to guarantee the validity of the instrument. Thus, the questionnaire was completed by 50 respondents in the pre-testing stage. Considering the reliability of the research, we used split half reliability method. We split our sample in half, and we checked

the variables in from our sub-samples in order to see if the variables provided similar results. The convergent results we obtained by applying the split half method showed that we obtained a high fidelity measurement.”

**Reviewer 1 point 8:** methods and data (please to review the journal authors guideline).Also the reserch design is missed, please to clarify the research design used.

**Response 8:** We thank the reviewer for the suggestion. We reviewed again the journal author guidelines. Also, we added a research design section and the text contained in the section can be found at lines 365-385 of the manuscript with the “Track changes” and “All markup” option active.

**Reviewer 1 point 9:** start new sentence (line 333) in the PDF version of our manuscript

**Response 9:** We thank the reviewer for the recommendation. We complied with it and we started a new sentence, at page 17 of the manuscript with “Track changes” and “All markup” option active, lines 372 we deleted the words “At the beginning of the questionnaire”, and we started a new sentence with “The respondents were informed...”.

**Reviewer 1 point 10:** Also this section should not include the data interpretation or analysis. it should include only description.

**Response 10:** The reviewer referred to the “Sample and data collection procedure” section. We are grateful to the reviewer for the suggestion and in order to comply with it we made some changes to the text which was written in this section. In this regard, the data interpretation and analysis was removed from the section, and was moved to the “Results” section of our paper. The deleted text together with the table can be seen at lines 427 –444 of the revised manuscript with “Track changes” and “All markup” option active. The text we inserted in the “Results” section can be seen at lines 486-501 of the manuscript:

“Out of the 536 respondents, 460 (85.8%) were female and 76 (14.2%) were male. A total of 411 respondents live in the urban area (76.7%), while 125 (23.3%) live in the rural area. Most respondents (286, 53.4%) are between 18 and 35 years of age, 142 respondents (26.5%) are between 36 and 50 years of age, 102 respondents (19.0%) are between 51 and 65 years of age, and 6 of them (1.1) are over 65 years of age. When it comes to the professional degree of the respondents, most of them are students at a university nursing program (122, 22.8%), and medical students (120, 22.4%). However, a total of 102 respondents (19.0%) are senior specialists medical – doctors, and 70 (13.1%) are nurses who have a higher education diploma. When it comes to the respondents field of specialization, most of them (70.5%) operate in the field of general medicine, while others are family doctors (10.4%), pediatricians (3%), dentists or oncologists (1.9%), surgeons of doctors who are specialized in internal medicine (1.5%), or infectious disease doctors, radiologists or cardiologists (1.1%). Furthermore, most of the respondents (77.2%) stated that they did not work a unit with COVID – 19 patients while few of them (22.8%) stated that they worked in such a unit at the time the research was conducted. Thus, all the characteristics of the sample are presented in Table 1.

**Table 1.** Sample characteristics (n = 536).

|                         | <b>Category</b>                                | <b>Count</b> | <b>Percentage</b> |
|-------------------------|------------------------------------------------|--------------|-------------------|
| Gender                  | Female                                         | 460          | 88.8%             |
|                         | Male                                           | 76           | 14.2%             |
| Living environment      | Urban                                          | 411          | 76.7%             |
|                         | Rural                                          | 125          | 23.3%             |
| Age                     | 18-35 years old                                | 286          | 53.4%             |
|                         | 36-50 years old                                | 142          | 26.5%             |
|                         | 51 -65 years old                               | 102          | 19.0%             |
|                         | Over 65 years old                              | 6            | 1.1%              |
| Professional degree     | Senior specialist medical - doctor             | 102          | 19.0%             |
|                         | Specialist medical - doctor                    | 46           | 8.6%              |
|                         | Resident                                       | 28           | 5.2%              |
|                         | Nurse with higher education diploma            | 70           | 13.1%             |
|                         | Nurse with other studies than higher education | 48           | 9.0%              |
|                         | Medical student                                | 120          | 22.4%             |
|                         | Student at university nursing program          | 122          | 22.8%             |
| Field of specialization | General medicine                               | 378          | 70.5%             |
|                         | Family doctor                                  | 56           | 10.4%             |
|                         | Pediatrics                                     | 16           | 3%                |
|                         | Stomatology                                    | 10           | 1.9%              |
|                         | Oncology                                       | 10           | 1.9%              |
|                         | Surgery                                        | 8            | 1.5%              |
|                         | Internal medicine                              | 8            | 1.5%              |

|                                        |                                     |     |       |
|----------------------------------------|-------------------------------------|-----|-------|
|                                        | Virology/ infectious disease doctor | 6   | 1.1%  |
|                                        | Cardiology                          | 6   | 1.1%  |
|                                        | Radiology                           | 6   | 1.1%  |
|                                        | Other                               | 32  | 6%    |
| Works in a unit with COVID 19 patients | Yes                                 | 122 | 22.8% |
|                                        | No                                  | 414 | 77.2% |

”

**Reviewer 1 point 11:** please to explain how you calculated the sample size and the type of sampling that you used.

**Response 11:** We thank the reviewer for the suggestion. We offered an explanation for this point, which was also mentioned by the reviewer in the summary provided in the e-mail sent to the corresponding author. However, we will present again the explanation, which can be found at lines 413-416 of the manuscript with “Track changes” and “All markup” option active:

“Taking into account the sampling method and the calculation of the study sample, we used random, probabilistic sampling method. We took into consideration specialists, physicians and medical students from Brasov, and we applied the snowballing method in order to disseminate the questionnaire.”

**Reviewer 1 point 12:** this section should be trasfered before data presentation and analysis with the methods part before data analysis

**Response 12:** The reviewer was referring to “The research instrument” section. We thank the reviewer for the suggestion. Since the section was already written before the “Data analysis” section, we moved the section before “Sampling and data collection procedures”. The deleted text can be seen at lines 446-465 in the revised the manuscript with “Track changes” and “All markup” option active. The section was moved and so, the following text can be found in the revised manuscript at lines 387-406:

“In order to conduct the research we used a quantitative method while having a questionnaire as an instrument. In this regard, we developed a questionnaire which comprises four sections: A. Influence of the pandemic on the professional activity of medical staff (items A1 to A4), B. Perception about the authorities’ communication process (items B1 to B11), C. Perception about the communication of non- validated treatments (items C1 to C20), and D. Sociodemographic questions (items D1 – D9), such as: gender, age, living environment, professional degree, field of specialization. The sociodemographic questions were used in order to identify different or similar attitudes between specific groups. The questionnaire can be found in “S1.Appendix English



version of the questionnaire”, and in “S2. Appendix Romanian version of the questionnaire.” Before disseminating the questionnaire, the instrument was tested on 30 doctors who work in the field of cardiology and general medicine. The respondents understood clearly the questions and did not report any issue in the process of answering them. Hence, the questionnaire comprises close ended and open ended questions (Items A1, A4, B3, B11, C19, C20, D2, D5, D6,) dihotomic questions as well as questions whose answers were measured on a 7 point Likert scale. For example, item A2 measured the extent to which the respondents considered that the pandemic influenced the way they carried out their professional activity (1- “to an extremely little extent, 7 “to an extremely great extent”), or item B2 measure the respondents’ level of agreement with statements regarding the way authorities communicated during the pandemic (1 – “strongly disagree, 7-“strongly agree”).”

**Reviewer 1 point 13:** the validity and reliability section is missed , please to discuss it clearly

**Response 13:** We thank the reviewer for the recommendation. In order to address the recommendation, we inserted into our manuscript information about the validity and reliability of our research in the “Research design” section. In this regard, at page 18 of the manuscript with “Track changes” and “All markup” option active, lines 376 – 385, we inserted the following explanation:

“Considering the validity of our research, we took into account the theoretical information from the literature regarding the development of a questionnaire. Our team of researchers together with health specialists have configured the dimensions, and operationalized the concepts in accordance with the theoretical approaches identified at the current stage of the research. Even more, we pre-tested the questionnaire before disseminating in order to guarantee the validity of the instrument. Thus, the questionnaire was completed by 50 respondents in the pre-testing stage.

Considering the reliability of the research, we used split half reliability method. We split our sample in half, and we checked the variables in from our sub-samples in order to see if the variables provided similar results. The convergent results we obtained by applying the split half method showed that we obtained a high fidelity measurement.”

**Reviewer 1 point 14:** you have two tables number by number 1 two times. please to review the tables numbering and indexing in the maneuscript.

**Response 14:** We are very grateful to the reviewer for pointing this out. We checked again all the numbers of the tables and corrected all the mistakes. Now in the revised manuscript, all the tables are correctly numbered.

**Reviewer 1 point 15:** these codes need to be interpreted ( to give its full interpretaion under each table)

**Response 15:** We thank the reviewer for the suggestion. The reviewer was referring to the numbers of the questions which appear in the tables with correlations and t tests. Those numbers represent the number of the questions from the questionnaires which were included in the t tests or in the correlations. In other words, the numbers refer to the variables used in order to make the

tests and the correlations. For example, in Table 3, C14 means, the question 14 from the questionnaire, which belongs to section C. Section C refers to Perception about the communication of non- validated treatments. So, under each table from our manuscript (including the tables which we put in supplementary information) we added an explanation of the codes (numbers).

We would like to mention that the numbers of our tables changed, because in the initial manuscript we had two tables numbered 1, so now we corrected the mistake. Thus, we further present the explanation we gave in the revised manuscript with “Track changes” and “All markup” option active, under each table:

Table 3 (which was table 2 in the initial manuscript). The following explanation was added under the table: “<sup>1</sup> C14 – refers to the question 14 from the section C of the manuscript (The extent to which information about alternative treatments affected trust in physicians), section which refers to Perception about the communication of non- validated treatments; <sup>2</sup>D2 - refers to question 2 from the D section of the manuscript (age), which refers to Sociodemographic characteristics of the respondents

Table 8 (which was Table 7 in the initial manuscript). The following explanation was added under the table “<sup>1</sup> B10- refers to the question 10 from the section B of the manuscript (Satisfaction with the way information about drugs used to treat the virus was communicated) section which refers to Perception about the authorities’ communication process; <sup>2</sup>D2 - refers to question 2 from the D section of the manuscript (age), which refers to Sociodemographic characteristics of the respondents.”

Table 13 (which was Table 12 in the initial manuscript). The following explanation was added under the table “<sup>1</sup> C1 – refers to question 1 from the section C of the manuscript (The extent to which social media represents an appropriate environment for sharing official COVID – 19 info), section which refers to Perception about the communication of non- validated treatments; <sup>2</sup>D2 - refers to question 2 from the D section of the manuscript (age), which refers to Sociodemographic characteristics of the respondents.

Table 16 (which was Table 15 in the initial manuscript and which is in Supplementary information - S7 Tables with results to the 5th research question). The following explanation was added under the table “<sup>2</sup>A3 – refers to question 3 from the section A of the manuscript (Main aspect of professional life influenced by the pandemic), section which refers to Influence of the pandemic on the professional activity of medical staff; The explanation for <sup>1</sup> *professional degree* was already written under the table in the initial version of our manuscript.

**Reviewer 1 point 16:** the variables need to be clear on the table

**Response 16:** We thank the reviewer for pointing this out. The reviewer was referring to the variables from the table which had the number 3 in the initial version of our manuscript. The table now has the number 4, because we corrected the way we numbered the tables. Hence, in order to be clear which the variables in the table are, we put the word “variables” in front of the variables which were tested. The changes to the table can be seen in the revised version of our manuscript with “Track changes” and “All markup” option active at page 29:

**“Table 4. Significant t-test results: comparisons between variables**

|                                                                           |                             | t-test for Equality of Means |      |       |       |     |     |                 |            |       |       |
|---------------------------------------------------------------------------|-----------------------------|------------------------------|------|-------|-------|-----|-----|-----------------|------------|-------|-------|
| Variables:                                                                | Group                       | N                            | Mean | S. D. | t     | df  | p   | Mean Difference | Std. Error | CI    |       |
|                                                                           |                             |                              |      |       |       |     |     |                 |            | Lower | Upper |
| Information about alternative treatments Professional degree <sup>1</sup> | Medical staff               | 294                          | 5.33 | 1.54  | -2.04 | 534 | .04 | -.27            | .13        | -.52  | -.01  |
|                                                                           | Student                     | 242                          | 5.60 | 1.49  |       |     |     |                 |            |       |       |
| Information about alternative treatments _working unit                    | Unit with COVID patients    | 122                          | 5.19 | 1.61  | -2.13 | 534 | .03 | -.33            | .15        | -.64  | -.02  |
|                                                                           | Unit without COVID patients | 414                          | 5.53 | 1.49  |       |     |     |                 |            |       |       |
| Information about alternative treatments _gender                          | Male                        | 76                           | 5.10 | 1.70  | -2.16 | 534 | .03 | -.40            | .18        | -.77  | -.03  |
|                                                                           | Female                      | 460                          | 5.51 | 1.48  |       |     |     |                 |            |       |       |

<sup>1</sup>Index variable from the professional degrees of respondents. Student: medical student and student at university nursing program, Medical Staff: Senior specialist medical – doctor, Specialist medical – doctor, Resident, Nurse with higher education diploma, Nurse with other studies than higher education”

**Reviewer 1 point 17:** there keys need to be written in full interpretaion under each table.

**Response 17:** We thank the reviewer for the recommendation. We complied with it, and as we explained at one of the previous points of the reviewer, the keys (or codes) refer to the number of the question from the questionnaire, and the letter refers to the section of the questionnaire. Hence, the reviewer referred to the table which had the number 7 in the initial version of our manuscript. The table has the number 8 in the revised version of our manuscript with “Track changes” and “All markup” option active, because we corrected the way we numbered the tables. Under table 8, at page 33 of the manuscript we added the following explanation:

“<sup>1</sup> B10- refers to the question 10 from the section B of the manuscript (Satisfaction with the way information about drugs used to treat the virus was communicated) section which refers to Perception about the authorities’ communication process; <sup>2</sup>D2 - refers to question 2 from the D section of the manuscript (age), which refers to Sociodemographic characteristics of the respondents.”

**Reviewer 1 point 18:** the tables are too much, please to focus on the highly significant tables and add the others as a supplementary tables. it is recommended to reduce the number of tables to 5 or 6 tables

Response 18: We are very grateful to the reviewer for the useful suggestion. We complied with the suggestion and we deleted some tables from the manuscript and added them as supplementary information. Early in this Cover letter we provided an explanation for the tables, because this point was also included in the summary provided by the reviewer in the e-mail sent to the corresponding author. We let in the manuscript only the important tables: the tables with correlations and t tests, and the table with sociodemographic characteristics of the respondents. Thus, we presented again the explanation for the way we included the tables in supplementary information:

We created Word documents with supplementary information for each of our research questions. In this regard in S3\_Tables with results to the 1<sup>st</sup> research question we included Table 1; in S4\_Tables with results to the 2<sup>nd</sup> research question we included Table 4 and Table 5; in S5\_Tables with results to the 3<sup>rd</sup> research question we included Table 6 and Table 8; in S6\_Tables with results to the 4<sup>th</sup> research question we included Table 10 and Table 11; in S7\_Tables with results to the 5<sup>th</sup> research question we included Table 14 and Table 15.

**Reviewer 1 point 19:** the conclusion section should be summarized to one paragraph summarize your important results and its significance and the future related researches

**Response 19:** We thank the reviewer very much for the recommendation. We answered to this point previously in this Cover letter, because the same point was also mentioned in the summary provided by the reviewer in the e-mail sent to the corresponding author by the journal (“the conclusion section need to be summarized and conclude the main study findings and its significance.”). In this regard, we present again the redundant information we deleted from the Conclusions section, the way we highlighted the main results, their significance as well as the future research directions.

The information we deleted from the Conclusions section:

“In this regard, besides fighting the pandemic, physician also had to fight the so called infodemic. Fake news spread on social media about various alternative treatments for the virus and the opinions of certain professionals about treatment methods which later proven to be inaccurate negatively influenced the credibility of doctors.” (Lines 789-792)

“This results can suggest that while professionals were aware of the role of social media in spreading medical misinformation and in affecting trust in doctors, due to their knowledge, at personal level they were less affected by that type of information, many of them believing that social media should also be used for sending official information” (lines 803-807)

“Moreover, the medical staff was aware of the alternative treatments which were promoted on social media, the method of drinking alcohol in order to prevent the infection being the method that most of the respondents have heard about” (lines 811-813).

“Hence, on the basis of the findings and implications of the study, we further discuss limitations and future research directions.” (Lines 838-839).

Next, we took into account the recommendation of the reviewer and we started the section by presenting the main findings of our research. Since we had several research questions, we presented our main findings in relation to those research questions. Next, the reviewer recommended us to explain the significance of our study. Thus, in the paper we had already written the theoretical and practical implication of our paper. In this regard, we did not delete the implications because we consider that the implications emphasize why the study conducted is important and how it can be further taken into consideration. Next, we did not delete the limitations and future research directions either, because we considered necessary to highlight how and why our study has limitations but also how it could be further developed or extended.

**Reviewer 1 point 20:** please to review your references and filter it to 30 to 40 references as 83 references are too much references

Response 20: We are very grateful to the reviewer for the suggestion and we understand the perspective of the reviewer. We would like to mention that we gave an explanation to this point early in this Cover letter, because the point was included in the summary which was sent by e-mail to the corresponding author. However, we insert again below the explanation for this point, explanations in which we show why we were unable to fully comply with the suggestion of the reviewer and delete more than half of our references:

We are very grateful to the reviewer for this recommendation and we appreciated the interest in improving our paper. However, when we started to write the article, we wanted to make sure our paper will be well documented and that it will address all the theoretical concepts and aspects needed. In this regard, we made a thorough research and literature review on the medication used in order to treat the virus, on the way social media contributed to the spread of misinformation about the virus, on the way misinformation influenced people’s confidence in the opinion of doctors and on the way the doctor- patient relation was affected during the pandemic. Thus, we searched and found many research papers and we reviewed all of them because we wanted for our paper to provide an overall view on the subject addressed. In this regard, all the references we used are relevant for the subject approached and for the research that we conducted. In other words, through the references cited we support and sustain our arguments, we show how other researchers approached similar matters and thus we could not afford to reduce them. By reducing them we could no longer have a strong and well consolidated theoretical background and we could not properly explain how we wanted to address the matter of medical misinformation and its effects from the perspective of medical staff. Even more, the journal does not have a limitation regarding the length of the article or the number of references: “Manuscripts can be any length. There are no restrictions on word count, number of figures, or amount of supporting information”. In addition, we have seen articles which addressed subjects related to health and the COVID – 19 pandemic, and which were published in PLOS ONE, that have more than 40 references. For example, one article entitled “Severity of infection with the SARS- CoV -2 B1.1.7 lineage among hospitalized COVID – 19 patients in Belgium” (<https://journals.plos.org/plosone/article?id=10.1371/journal.pone.0269138>), has 76 references,

and another article, entitled “The coronavirus disease 2019 (COVID -19) vaccination psychological antecedent assessment using the ARABIC 5c validated tool: An online survey in 13 Arab countries” (<https://journals.plos.org/plosone/article?id=10.1371/journal.pone.0260321>) has 71 references.

We would like to mention again that we did our best in trying to address all the suggestions of the reviewer and that we are thankful to the reviewer for all the points raised, for the time spent on analyzing our paper and for providing us very useful recommendations!

## **Response to reviewer 2**

**Reviewer 2 comment:** The study is interesting and shows the point of view of health professionals, misinformation affected trust with the patient. Another fact is that even among professionals, there are different perceptions about the spread of fakenews, according to age and occupation.

Response from authors: We are very grateful to the reviewer for his/hers kind words, and we appreciate the time the reviewer spent on reviewing our paper. We addressed all the recommendations of the reviewer and we will present each of the changes we made to the text. Before describing the way we addressed all the comments, we would like to mention that the changes can be best seen in the revised version of our manuscript, which has the “Track changes” and “All markup” options active.

**Reviewer 2 comment 1:** Thus, I suggest adequacy in the title, as it is not expressing exactly what the study observed.

**Response 1:** We thank the reviewer for the very useful suggestion. In order to comply with it, we changed the title of our manuscript in order for it to be more appropriate and more in line with the aim and the results of our study. In this regard, the new title of the manuscript is “Misinformation about medication during the COVID – 19 pandemic – a perspective of medical staff” (Lines 2-3). The title now highlights the fact that the study focused on misinformation about medication during the pandemic, and on the effects that misinformation had on doctors, from the perspective of specialists (doctors, nurses, medical students).

**Reviewer 2 comment 2:** The survey instrument was validated by a sufficient number of professionals; however, I did not find the attached instrument to be evaluated and to verify that the questions supported the statistical data that was generated. It is important to send supplementary material S1 so that the reviewer can evaluate the work impartially.

**Response 2:** We are very grateful to the reviewer for pointing this out. However, when we submitted the manuscript, we did upload the questionnaire as supplementary information, both in Romanian language and in English (S1\_Appendix English version of the questionnaire; S2\_Appendix Romanian version of the questionnaire).| In order to comply with the recommendation of the reviewer, we will try to upload again the questionnaire, and we will also insert it at the end of this document, so that the reviewer can have access to it. In this regard, the reviewer can find below the English and Romanian version of our questionnaire.

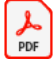

S1\_Appendix English  
version of the questio

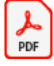

S2\_Appendix  
Romanian version of 1

**Reviewer 2 comment 3:** The Information on drugs used to treat COVID 19 topic of the Literature review covers the year 2020 and serves to locate the context that health professionals were in at the time of answering the questionnaire, however, there is a lack of information on the drugs that were being recommended by the WHO in the period of application of the questionnaire, which was from April to June 2021. Contextualizing how the data were in the period when the instrument was applied can directly impact the conclusion: “Healthcare professionals knew about the drugs used in clinical trials”.

**Response 3:** We thank the reviewer for the useful suggestion. We searched for sources which contained information regarding the types of drugs available and approved in the period in which we conducted our research (April – June 2021) and we saw that among the drugs approved were also the drugs about which the respondents to our research had knowledge. Besides drugs, the news regarding the virus started to focus also on information about possible vaccines, so the information about antiviral drugs started to be published more rarely. Hence, our conclusion regarding the fact that “Healthcare professionals knew about the drugs used in clinical trials” is still true. Thus, we researched the literature and added an explanation in our Discussion section, but we did not insert the references into our paper, because Reviewer 1 mentioned that we have many references in our paper and that we should reduce them. However, Reviewer 2 can consult the references because we will insert them here after we provide the explanation. Hence, in the Discussion section of our manuscript, page 43, lines 753-760 we added the following explanation:

“Moreover, during the period in which we conducted our research, (April – June 2021), among the drugs which were approved were Remdesivir Tocilizumab – which was authorized first in June 2021, drug which were also acknowledged by the respondents of our research” [Reference 84, Reference 85].”

Even more, one of the authors of the article (L.R.) is a doctor and was directly involved in the process of taking care of COVID – 19 patients, so the author can confirm that among the drugs which were in trial, or which were approved for administration against COVID-19 were also the drugs which were acknowledged by the respondents of our research.

Reference 84: Food and drug administration. Coronavirus (COVID-19) Drugs [Internet]. Food and Drug Administration. [cited 2022 June 20] Available from: <https://www.fda.gov/drugs/emergency-preparedness-drugs/coronavirus-covid-19-drugs>

Reference 85: Murdock, J. The Latest Updates on COVID-19 Treatments and Medications in the Pipeline. [Internet]. 23 May 2022 [cited 2022 June 20] Available from: <https://www.goodrx.com/conditions/covid-19/coronavirus-treatments-on-the-way>

**Reviewer 2 comment 4:** Minor revisions: When reading, there are differences in font size/type. E.g. lines 206 and. 534

**Response 4:** We thank the reviewer for pointing this out. We would firstly like to mention that line 206 has the number 245 in the revised version of the manuscript with “Track changes” and “All markup” option active, and line 534 has the number 645. In order to make sure there will no differences in font/size type, we checked again our manuscript and we corrected the mistakes. In this regard, we made sure the text from our manuscript is all formatted with Calibri, size 12.

We thank again the reviewer for spending time on reviewing our paper and for providing us very useful suggestions!

We are very grateful to the reviewers and the academic editor for all the suggestions, comments and points raised in order to improve our paper!

Sincerely,  
Prof. Dr. Claudiu Coman
